# Supplementary material for: Financial performance of English NHS trusts and variation in clinical outcomes: a longitudinal observational study
Source: PubMed Central journal article supplement — BMJ Open. 2019 Jan 28;9(1):e021854. doi: 10.1136/bmjopen-2018-021854 (PMC6352807; doi:10.1136/bmjopen-2018-021854), 2019-01-28

# Financial Performance of English NHS Trusts and Clinical Outcomes: A Longitudinal Observational Study

## ONLINE SUPPLEMENTAL DATA

Myura Nagendran, MRCP, FRCA<sup>1</sup>

Grace Kiew, MB BChir<sup>2</sup>

Rosalind Raine, PhD<sup>3</sup>

Rifat Atun, FRCP<sup>4</sup>

Mahiben Maruthappu, BM BCh<sup>5</sup>

1. Academic Clinical Fellow, Division of Anaesthetics, Pain Medicine and Intensive Care, Imperial College London, UK
2. Foundation Doctor, North West Anglia NHS Foundation Trust, Peterborough, UK
3. Professor, Department of Applied Health Care, University College London, UK
4. Professor, Harvard T.H. Chan School of Public Health, Harvard University, Boston, MA, USA
5. Public Health Registrar, Department of Epidemiology and Public Health, University College London, UK

**Supplement version:** 2.3

## FINANCIAL DATA EXTRACTION

Where financial data was extracted from consolidated end of year accounts files via the gov.uk open data portal, the following fields were extracted:

### For foundation trusts:

Turnover --> Table ID 1, Subcode 100  
Surplus/Deficit --> Table ID 1, Subcode 160  
Consultancy --> 07A and 07I, subcode 280  
Agency spend --> 1415TRU06\_EXP\_P13, maincode 01, subcode 180

### For non-Foundation trusts:

Turnover --> Table ID CNE, Subcode 120 and 130  
Surplus/Deficit --> Table ID CNE, Subcode 390  
Consultancy --> 08C, subcode 125 (**only available for 2014-16**)  
Agency spend --> 1415TRU09\_EMP\_P13, maincode 04, subcode 100 (**only available for 2015-16**)

## DELAYED TRANSFERS OF CARE IN FINANCIAL YEAR ENDING 2011

Delayed transfer of care data were only available at Trust level for the latter eight months of the 2011 financial year. To ensure comparability with other years, a 1.5x multiplier was applied for each trust in this financial year with a sensitivity analysis to examine any impact of this change.

The total numbers of delayed transfers for all hospitals were available as an aggregate total (data obtained from King's Fund Quarterly Monitoring Report for 2010-11).

The ratio of aggregate delayed transfer of care days for the first 4 months (April 2010 to July 2010) to the last 8 months (August 2010 to March 2011) was 0.492; suggesting that a 1.5x multiplier appeared reasonable.

| Year | Month | Number of DTOCs | 4-monthly total |
|------|-------|-----------------|-----------------|
|      |       |                 |                 |
| 2010 | Apr   | 113900          | -               |
| 2010 | May   | 112442          | -               |
| 2010 | Jun   | 115336          | -               |
| 2010 | Jul   | 109918          | <b>451596</b>   |
| -    | -     | -               | -               |
| 2010 | Aug   | 115855          | -               |
| 2010 | Sep   | 113246          | -               |
| 2010 | Oct   | 113091          | -               |
| 2010 | Nov   | 116466          | <b>458658</b>   |
| -    | -     | -               | -               |
| 2010 | Dec   | 114346          | -               |
| 2011 | Jan   | 112386          | -               |
| 2011 | Feb   | 123130          | -               |
| 2011 | Mar   | 109362          | <b>459224</b>   |

## CHANGES TO TRUST COMPOSITION

The 168 Trusts listed below include specialist Trusts (e.g. Great Ormond Street Hospital for Children NHS Foundation Trust) that were excluded prior to analysis. Changes in composition to the Trusts (creation of a new Trust, dissolution of an existing Trust, acquisitions of a hospital or entire Trust to another Trust and mergers between Trusts) are detailed at the end of the table.

| Trust                                                           | Trust identifier | Change in composition | Transitioned to Foundation status | Foundation Trust transition date |
|-----------------------------------------------------------------|------------------|-----------------------|-----------------------------------|----------------------------------|
| Aintree University Hospital NHS Foundation Trust                | REM              |                       |                                   |                                  |
| Airedale NHS Foundation Trust                                   | RCF              |                       | Yes                               | 01/06/2010                       |
| Alder Hey Children's NHS Foundation Trust                       | RBS              |                       |                                   |                                  |
| Ashford and St Peter's Hospitals NHS Foundation Trust           | RTK              |                       | Yes                               | 01/12/2010                       |
| Barking, Havering and Redbridge University Hospitals NHS Trust  | RF4              |                       |                                   |                                  |
| Barnet and Chase Farm Hospitals NHS Trust                       | RVL              | Yes (1)               |                                   |                                  |
| Barnsley Hospital NHS Foundation Trust                          | RFF              |                       |                                   |                                  |
| Barts and the London NHS Trust                                  | RNJ              | Yes (2)               |                                   |                                  |
| Barts Health NHS Trust                                          | R1H              | Yes (3)               |                                   |                                  |
| Basildon and Thurrock University Hospitals NHS Foundation Trust | RDD              |                       |                                   |                                  |
| Bedford Hospital NHS Trust                                      | RC1              |                       |                                   |                                  |
| Birmingham Children's Hospital NHS Foundation Trust             | RQ3              |                       |                                   |                                  |
| Birmingham Women's NHS Foundation Trust                         | RLU              |                       |                                   |                                  |
| Blackpool Teaching Hospitals NHS Foundation Trust               | RXL              |                       |                                   |                                  |
| Bolton NHS Foundation Trust                                     | RMC              |                       |                                   |                                  |
| Bradford Teaching Hospitals NHS Foundation Trust                | RAE              |                       |                                   |                                  |
| Brighton and Sussex University Hospitals NHS Trust              | RXH              |                       |                                   |                                  |
| Buckinghamshire Healthcare NHS Trust                            | RXQ              |                       |                                   |                                  |

|                                                                |     |         |     |            |
|----------------------------------------------------------------|-----|---------|-----|------------|
| Burton Hospitals NHS Foundation Trust                          | RJF |         |     |            |
| Calderdale and Huddersfield NHS Foundation Trust               | RWY |         |     |            |
| Cambridge University Hospitals NHS Foundation Trust            | RGT |         |     |            |
| Central Manchester University Hospitals NHS Foundation Trust   | RW3 | Yes (4) |     |            |
| Chelsea and Westminster Hospital NHS Foundation Trust          | RQM | Yes (5) |     |            |
| Chesterfield Royal Hospital NHS Foundation Trust               | RFS |         |     |            |
| City Hospitals Sunderland NHS Foundation Trust                 | RLN |         |     |            |
| Colchester Hospital University NHS Foundation Trust            | RDE |         |     |            |
| Countess Of Chester Hospital NHS Foundation Trust              | RJR |         |     |            |
| County Durham and Darlington NHS Foundation Trust              | RXP |         |     |            |
| Croydon Health Services NHS Trust                              | RJ6 |         |     |            |
| Dartford and Gravesham NHS Trust                               | RN7 |         |     |            |
| Derby Teaching Hospitals NHS Foundation Trust                  | RTG |         |     |            |
| Doncaster and Bassetlaw Hospitals NHS Foundation Trust         | RP5 |         |     |            |
| Dorset County Hospital NHS Foundation Trust                    | RBD |         |     |            |
| Ealing Hospital NHS Trust                                      | RC3 | Yes (6) |     |            |
| East and North Hertfordshire NHS Trust                         | RWH |         |     |            |
| East Cheshire NHS Trust                                        | RJN |         |     |            |
| East Kent Hospitals University NHS Foundation Trust            | RVV |         |     |            |
| East Lancashire Hospitals NHS Trust                            | RXR |         |     |            |
| East Sussex Healthcare NHS Trust                               | RXC |         |     |            |
| Epsom and St Helier University Hospitals NHS Trust             | RVR |         |     |            |
| Frimley Health NHS Foundation Trust                            | RDU | Yes (7) |     |            |
| Gateshead Health NHS Foundation Trust                          | RR7 |         |     |            |
| George Eliot Hospital NHS Trust                                | RLT |         |     |            |
| Gloucestershire Hospitals NHS Foundation Trust                 | RTE |         |     |            |
| Great Ormond Street Hospital for Children NHS Foundation Trust | RP4 |         | Yes | 01/03/2012 |
| Great Western Hospitals NHS Foundation Trust                   | RN3 |         |     |            |
| Guy's and St Thomas' NHS Foundation Trust                      | RJ1 |         |     |            |
| Hampshire Hospitals NHS Foundation Trust                       | RN5 | Yes (8) |     |            |

|                                                               |     |          |     |            |
|---------------------------------------------------------------|-----|----------|-----|------------|
| Harrogate and District NHS Foundation Trust                   | RCD |          |     |            |
| Heart Of England NHS Foundation Trust                         | RR1 |          |     |            |
| Heatherwood and Wexham Park Hospitals NHS Foundation Trust    | RD7 | Yes (9)  |     |            |
| Hinchingbrooke Health Care NHS Trust                          | RQQ |          |     |            |
| Homerton University Hospital NHS Foundation Trust             | RQX |          |     |            |
| Hull and East Yorkshire Hospitals NHS Trust                   | RWA |          |     |            |
| Imperial College Healthcare NHS Trust                         | RYJ |          |     |            |
| Ipswich Hospital NHS Trust                                    | RGQ |          |     |            |
| Isle Of Wight NHS Trust                                       | R1F | Yes (10) |     |            |
| James Paget University Hospitals NHS Foundation Trust         | RGP |          |     |            |
| Kettering General Hospital NHS Foundation Trust               | RNQ |          |     |            |
| King's College Hospital NHS Foundation Trust                  | RJZ | Yes (11) |     |            |
| Kingston Hospital NHS Foundation Trust                        | RAX |          | Yes | 01/05/2013 |
| Lancashire Teaching Hospitals NHS Foundation Trust            | RXN |          |     |            |
| Leeds Teaching Hospitals NHS Trust                            | RR8 |          |     |            |
| Lewisham and Greenwich NHS Trust                              | RJ2 | Yes (12) |     |            |
| Liverpool Heart and Chest NHS Foundation Trust                | RBQ |          |     |            |
| Liverpool Women's NHS Foundation Trust                        | REP |          |     |            |
| London North West Healthcare NHS Trust                        | R1K | Yes (13) |     |            |
| Luton and Dunstable University Hospital NHS Foundation Trust  | RC9 |          |     |            |
| Maidstone and Tunbridge Wells NHS Trust                       | RWF |          |     |            |
| Medway NHS Foundation Trust                                   | RPA |          |     |            |
| Mid Cheshire Hospitals NHS Foundation Trust                   | RBT |          |     |            |
| Mid Essex Hospital Services NHS Trust                         | RQ8 |          |     |            |
| Mid Staffordshire NHS Foundation Trust                        | RJD | Yes (14) |     |            |
| Mid Yorkshire Hospitals NHS Trust                             | RXF |          |     |            |
| Milton Keynes University Hospital NHS Foundation Trust        | RD8 |          |     |            |
| Moorfields Eye Hospital NHS Foundation Trust                  | RP6 |          |     |            |
| Newham University Hospital NHS Trust                          | RNH | Yes (15) |     |            |
| Norfolk and Norwich University Hospitals NHS Foundation Trust | RM1 |          |     |            |

|                                                                                    |     |          |     |            |
|------------------------------------------------------------------------------------|-----|----------|-----|------------|
| North Bristol NHS Trust                                                            | RVJ |          |     |            |
| North Cumbria University Hospitals NHS Trust                                       | RNL |          |     |            |
| North Middlesex University Hospital NHS Trust                                      | RAP |          |     |            |
| North Tees and Hartlepool NHS Foundation Trust                                     | RVW |          |     |            |
| North West London Hospitals NHS Trust                                              | RV8 | Yes (16) |     |            |
| Northampton General Hospital NHS Trust                                             | RNS |          |     |            |
| Northern Devon Healthcare NHS Trust                                                | RBZ |          |     |            |
| Northern Lincolnshire and Goole NHS Foundation Trust                               | RJL |          |     |            |
| Northumbria Healthcare NHS Foundation Trust                                        | RTF |          |     |            |
| Nottingham University Hospitals NHS Trust                                          | RX1 |          |     |            |
| Oxford University Hospitals NHS Foundation Trust                                   | RTH | Yes (17) | Yes | 01/10/2015 |
| Papworth Hospital NHS Foundation Trust                                             | RGM |          |     |            |
| Pennine Acute Hospitals NHS Trust                                                  | RW6 |          |     |            |
| Peterborough and Stamford Hospitals NHS Foundation Trust                           | RGN |          |     |            |
| Plymouth Hospitals NHS Trust                                                       | RK9 |          |     |            |
| Poole Hospital NHS Foundation Trust                                                | RD3 |          |     |            |
| Portsmouth Hospitals NHS Trust                                                     | RHU |          |     |            |
| Queen Victoria Hospital NHS Foundation Trust                                       | RPC |          |     |            |
| Robert Jones and Agnes Hunt Orthopaedic and District Hospital NHS Foundation Trust | RL1 |          | Yes | 01/08/2011 |
| Royal Berkshire NHS Foundation Trust                                               | RHW |          |     |            |
| Royal Brompton and Harefield NHS Foundation Trust                                  | RT3 |          |     |            |
| Royal Cornwall Hospitals NHS Trust                                                 | REF |          |     |            |
| Royal Devon and Exeter NHS Foundation Trust                                        | RH8 |          |     |            |
| Royal Free London NHS Foundation Trust                                             | RAL | Yes (18) | Yes | 01/04/2012 |
| Royal Liverpool and Broadgreen University Hospitals NHS Trust                      | RQ6 |          |     |            |
| Royal National Hospital For Rheumatic Diseases NHS Foundation Trust                | RBB | Yes (19) |     |            |
| Royal National Orthopaedic Hospital NHS Trust                                      | RAN |          |     |            |
| Royal Surrey County NHS Foundation Trust                                           | RA2 |          |     |            |
| Royal United Hospitals Bath NHS Foundation Trust                                   | RD1 | Yes (20) | Yes | 01/11/2014 |
| Salford Royal NHS Foundation Trust                                                 | RM3 |          |     |            |

|                                                                       |     |          |     |            |
|-----------------------------------------------------------------------|-----|----------|-----|------------|
| Salisbury NHS Foundation Trust                                        | RNZ |          |     |            |
| Sandwell and West Birmingham Hospitals NHS Trust                      | RXK |          |     |            |
| Scarborough and North East Yorkshire Healthcare NHS Trust             | RCC | Yes (21) |     |            |
| Sheffield Children's NHS Foundation Trust                             | RCU |          |     |            |
| Sheffield Teaching Hospitals NHS Foundation Trust                     | RHQ |          |     |            |
| Sherwood Forest Hospitals NHS Foundation Trust                        | RK5 |          |     |            |
| Shrewsbury and Telford Hospital NHS Trust                             | RXW |          |     |            |
| South London NHS Healthcare Trust                                     | RYQ | Yes (22) |     |            |
| South Tees Hospitals NHS Foundation Trust                             | RTR |          |     |            |
| South Tyneside NHS Foundation Trust                                   | RE9 |          |     |            |
| South Warwickshire NHS Foundation Trust                               | RJC |          |     |            |
| Southend University Hospital NHS Foundation Trust                     | RAJ |          |     |            |
| Southport and Ormskirk Hospital NHS Trust                             | RVY |          |     |            |
| St George's University Hospitals NHS Foundation Trust                 | RJ7 |          | Yes | 01/02/2015 |
| St Helens and Knowsley Hospitals NHS Trust                            | RBN |          |     |            |
| Stockport NHS Foundation Trust                                        | RWJ |          |     |            |
| Surrey and Sussex Healthcare NHS Trust                                | RTP |          |     |            |
| Tameside Hospital NHS Foundation Trust                                | RMP |          |     |            |
| Taunton and Somerset NHS Foundation Trust                             | RBA |          |     |            |
| The Christie NHS Foundation Trust                                     | RBV |          |     |            |
| The Clatterbridge Cancer Centre NHS Foundation Trust                  | REN |          |     |            |
| The Dudley Group NHS Foundation Trust                                 | RNA |          |     |            |
| The Hillingdon Hospitals NHS Foundation Trust                         | RAS |          | Yes | 01/04/2011 |
| The Newcastle Upon Tyne Hospitals NHS Foundation Trust                | RTD |          |     |            |
| The Princess Alexandra Hospital NHS Trust                             | RQW |          |     |            |
| The Queen Elizabeth Hospital, King's Lynn. NHS Foundation Trust       | RCX |          | Yes | 01/02/2011 |
| The Rotherham NHS Foundation Trust                                    | RFR |          |     |            |
| The Royal Bournemouth and Christchurch Hospitals NHS Foundation Trust | RDZ |          |     |            |
| The Royal Marsden NHS Foundation Trust                                | RPY |          |     |            |
| The Royal Orthopaedic Hospital NHS Foundation Trust                   | RRJ |          |     |            |



|                                                              |     |          |     |            |
|--------------------------------------------------------------|-----|----------|-----|------------|
| The Royal Wolverhampton NHS Trust                            | RL4 | Yes (23) |     |            |
| The Walton Centre NHS Foundation Trust                       | RET |          |     |            |
| The Whittington Hospital NHS Trust                           | RKE |          |     |            |
| Torbay and South Devon NHS Foundation Trust                  | RA9 | Yes (24) |     |            |
| Trafford Healthcare NHS Trust                                | RM4 | Yes (25) |     |            |
| United Lincolnshire Hospitals NHS Trust                      | RWD |          |     |            |
| University College London Hospitals NHS Foundation Trust     | RRV |          |     |            |
| University Hospital Of South Manchester NHS Foundation Trust | RM2 |          |     |            |
| University Hospital Southampton NHS Foundation Trust         | RHM |          | Yes | 01/10/2011 |
| University Hospitals Birmingham NHS Foundation Trust         | RRK |          |     |            |
| University Hospitals Bristol NHS Foundation Trust            | RA7 |          |     |            |
| University Hospitals Coventry and Warwickshire NHS Trust     | RKB |          |     |            |
| University Hospitals Of Leicester NHS Trust                  | RWE |          |     |            |
| University Hospitals Of Morecambe Bay NHS Foundation Trust   | RTX |          | Yes | 01/10/2010 |
| University Hospitals of North Midlands NHS Trust             | RJE | Yes (26) |     |            |
| Walsall Healthcare NHS Trust                                 | RBK |          |     |            |
| Warrington and Halton Hospitals NHS Foundation Trust         | RWW |          |     |            |
| West Hertfordshire Hospitals NHS Trust                       | RWG |          |     |            |
| West Middlesex University Hospital NHS Trust                 | RFW | Yes (27) |     |            |
| West Suffolk NHS Foundation Trust                            | RGR |          | Yes | 01/12/2011 |
| Western Sussex Hospitals NHS Foundation Trust                | RYR |          | Yes | 01/07/2013 |
| Weston Area Health NHS Trust                                 | RA3 |          |     |            |
| Whipps Cross University Hospital NHS Trust                   | RGC | Yes (28) |     |            |
| Winchester and Eastleigh Healthcare Trust                    | RN1 | Yes (29) |     |            |
| Wirral University Teaching Hospital NHS Foundation Trust     | RBL |          |     |            |
| Worcestershire Acute Hospitals NHS Trust                     | RWP |          |     |            |
| Wrightington, Wigan and Leigh NHS Foundation Trust           | RRF |          |     |            |
| Wye Valley NHS Trust                                         | RLQ | Yes (30) |     |            |
| Yeovil District Hospital NHS Foundation Trust                | RA4 |          |     |            |
| York Teaching Hospital NHS Foundation Trust                  | RCB | Yes (31) |     |            |

1. Acquired by Royal Free London NHS FT in 2014
2. Merged with Newham University Hospital NHS Trust and Whipps Cross University Hospital NHS Trust to form Barts Health NHS Trust in 2012
3. Formed from the merger of Barts and the London NHS Trust, Whipps Cross University Hospital NHS Trust and Newham University Hospital NHS Trust in 2012
4. Acquired Trafford Healthcare NHS Trust in Apr 2012
5. Acquired West Middlesex University Hospital NHS Trust in Sep 2015
6. Merged with North West London Hospitals NHS Trust to form London North West Healthcare NHS Trust in 2014
7. Formed by merger of Heatherwood and Wexham Park Hospitals NHS FT and Frimley Park Hospital NHS FT on 1 October 2014
8. Formed by acquisition of Winchester and Eastleigh Healthcare Trust by Basingstoke and North Hampshire NHS FT in Jan 2012
9. Merged with Frimley Park Hospital NHS FT to form Frimley Health NHS FT on 1 October 2014
10. Created in Apr 2012 by a provider split from Isle of Wight NHS PCT (5QT)
11. Acquired Princess Royal University Hospital from South London NHS Healthcare Trust's dissolution in Oct 2013
12. Formed on 1 Oct 2013 by merger of merger of Lewisham Healthcare NHS Trust and Queen Elizabeth Hospital (previously part of South London NHS Healthcare Trust)
13. Formed by merger of Ealing Hospital NHS Trust and North West London Hospitals NHS Trust in 2014
14. Mid Staffordshire NHS FT which ran Stafford hospital dissolved In Nov 2014. Stafford hospital renamed to County Hospital and acquired by newly named University Hospitals of North Midlands NHS Trust
15. Merged with Barts and the London NHS Trust and Whipps Cross University Hospital NHS Trust to form Barts Health NHS Trust in 2012
16. Merged with Ealing Hospital NHS Trust to form London North West Healthcare NHS Trust in 2014
17. Formed from Oxford Radcliffe Hospitals NHS Trust by acquisition of Nuffield Orthopaedic Acute Centre NHS Trust in 2011
18. Acquired Barnet and Chase Farm Hospitals NHS Trust in 2014
19. Acquired by Royal United Hospital Bath NHS FT on 1 Feb 2015
20. Acquired Royal National Hospital For Rheumatic Diseases NHS FT on 1 Feb 2015
21. Acquired by York Teaching Hospital NHS Foundation Trust in Jul 2013
22. Dissolved in Oct 2013

23. Acquired Cannock Chase Hospital when Mid Staffordshire NHS FT dissolved In Nov 2014
24. Created on 1 Oct 2015 from South Devon Healthcare NHS Foundation Trust merging with Torbay and Southern Devon Health and Care NHS Trust (community and social care services)
25. Acquired by Central Manchester University Hospitals NHS FT in Apr 2012
26. Formed from University Hospital Of North Staffordshire NHS Trust taking over Stafford Hospital (now named County Hospital) on 1 Nov 2014. Mid Staffordshire NHS FT which ran Stafford hospital dissolved In Nov 2014
27. Acquired by Chelsea and Westminster Hospital NHS FT in Sep 2015
28. Merged with Newham University Hospital NHS Trust and Barts and the London NHS Trust to form Barts Health NHS Trust in 2012
29. Acquired by Basingstoke and North Hampshire NHS FT to form Hampshire Hospitals NHS FT in Jan 2012
30. Formed from Hereford Hospitals NHS Trust on 1 April 2011 following Herefordshire's health and adult social care providers joining to form an integrated provider of acute, community and social care in England
31. Acquired Scarborough and North East Yorkshire Healthcare NHS Trust in Jul 2013

## SENSITIVITY ANALYSES, ADDITIONAL TABLES AND FIGURES

**Table A. Association of operating margin with outcomes and process measures (summary model for 2011-13).** Operating margin and outcomes were averaged over the 3 years from 2011-13 to form the inputs to the summary model. Readmission rate is not included as data was not available for 2011-13. Abbreviations: A&E, Accident & Emergency; CI, confidence interval.

| <b>Agency spend as a proportion of turnover (%)</b> |             |             |             |             |             |             |
|-----------------------------------------------------|-------------|-------------|-------------|-------------|-------------|-------------|
|                                                     | <b>2011</b> | <b>2012</b> | <b>2013</b> | <b>2014</b> | <b>2015</b> | <b>2016</b> |
| <b>Worst 10%</b>                                    | 3.9         | 3.9         | 4.6         | 6.0         | 8.5         | 9.1         |
| <b>Middle 80%</b>                                   | 2.4         | 2.3         | 2.6         | 3.0         | 4.6         | 5.1         |
| <b>Best 10%</b>                                     | 2.7         | 2.9         | 3.4         | 3.8         | 4.0         | 4.5         |
|                                                     |             |             |             |             |             |             |
| <b>Ratio of worst to best</b>                       | 1.4         | 1.3         | 1.4         | 1.6         | 2.1         | 2.0         |
| <b>Difference (best and worst)</b>                  | 1.2         | 1.0         | 1.2         | 2.2         | 4.5         | 4.6         |

**Table B. Outcomes and process measures in Foundation trusts versus non-foundation trusts.** Excludes trusts that changed in composition or transitioned to Foundation status during the study period. Values are median (IQR). P-value refers to a Kruskal-Wallis equality-of-populations rank test.

|                                                               | <b>Foundation trust</b> | <b>Non-foundation trust</b> | <b>p-value</b> |
|---------------------------------------------------------------|-------------------------|-----------------------------|----------------|
| <b>Readmission rate (%)</b>                                   | 3.5 (3.0 to 3.9)        | 3.7 (3.3 to 4.0)            | <0.001         |
| <b>Inpatient satisfaction score (out of 10)</b>               | 8.0 (7.8 to 8.2)        | 7.8 (7.7 to 8.0)            | <0.001         |
| <b>A&amp;E 4 hour target breach rate (%)</b>                  | 5.4 (4.2 to 7.8)        | 6.9 (4.9 to 10.5)           | <0.001         |
| <b>Delayed transfer of care days per hospital bed</b>         | 6.8 (3.5 to 11.0)       | 7.0 (4.5 to 11.2)           | 0.241          |
| <b>Cancer two week wait target adherence (%)</b>              | 95.5 (94.6 to 96.7)     | 94.9 (94.0 to 96.3)         | <0.001         |
| <b>Cancer 62 days to first treatment target adherence (%)</b> | 87.7 (85.4 to 89.7)     | 86.2 (82.5 to 88.2)         | <0.001         |

**Tables C1 & C2. Association of operating margin on outcomes and process measures. Association of operating margin with outcomes and process measures.** These estimates are derived from a linear regression with outcome/process measure as the dependent variable and the following independent variables: operating margin, number of beds available and year. Each Trust in each year was treated as a separate observation with standard errors clustered by Trust to account for the non-independence of Trust-level data. Abbreviations: A&E, Accident & Emergency; CI, confidence interval. E1 includes Foundation trusts only. E2 includes non-Foundation trusts only. Trusts that transitioned to Foundation status are excluded in both tables.

**Table C1. Association of operating margin on outcomes and process measures in Foundation trusts.**

| <b>Outcome</b>                                         | <b>n</b> | <b>Trust clusters</b> | <b>Coefficient</b> | <b>95% CI</b>   | <b>p-value</b> |
|--------------------------------------------------------|----------|-----------------------|--------------------|-----------------|----------------|
|                                                        |          |                       |                    |                 |                |
| <b>Readmission rate (%)</b>                            | 206      | 71                    | -0.015             | -0.039 to 0.008 | 0.202          |
| <b>Inpatient satisfaction score (out of 10)</b>        | 429      | 73                    | 0.52               | -0.46 to 1.49   | 0.293          |
| <b>A&amp;E 4 hour breach rate (%)</b>                  | 430      | 73                    | -0.25              | -0.37 to -0.13  | <0.001         |
| <b>Delayed transfers of care days per hospital bed</b> | 431      | 73                    | -21.8              | -40.7 to -2.9   | 0.024          |
| <b>2 week wait cancer target adherence (%)</b>         | 431      | 73                    | 0.05               | -0.01 to 0.10   | 0.083          |
| <b>62 day cancer treatment target adherence (%)</b>    | 431      | 73                    | 0.08               | -0.02 to 0.17   | 0.110          |

**Table C2. Association of operating margin on outcomes and process measures in non-foundation trusts.**

| <b>Outcome</b>                                         | <b>n</b> | <b>Trust clusters</b> | <b>Coefficient</b> | <b>95% CI</b>   | <b>p-value</b> |
|--------------------------------------------------------|----------|-----------------------|--------------------|-----------------|----------------|
|                                                        |          |                       |                    |                 |                |
| <b>Readmission rate (%)</b>                            | 142      | 51                    | 0.004              | -0.023 to 0.032 | 0.751          |
| <b>Inpatient satisfaction score (out of 10)</b>        | 318      | 62                    | 1.59               | 0.43 to 2.76    | 0.008          |
| <b>A&amp;E 4 hour breach rate (%)</b>                  | 327      | 62                    | -0.23              | -0.39 to -0.07  | 0.005          |
| <b>Delayed transfers of care days per hospital bed</b> | 328      | 62                    | -39.2              | -63.3 to -15.1  | 0.002          |
| <b>2 week wait cancer target adherence (%)</b>         | 324      | 62                    | 0.26               | -0.06 to 0.11   | 0.527          |
| <b>62 day cancer treatment target adherence (%)</b>    | 324      | 62                    | 0.22               | 0.05 to 0.38    | 0.010          |

**Table D. Assessment of the impact of not adjusting for missing 2011 delayed transfer of care data.** Abbreviations: CI, confidence interval.

| <b>Delayed transfers of care days per hospital bed</b> | <b>n</b> | <b>Trust clusters</b> | <b>Coefficient</b> | <b>95% CI</b>  | <b>p-value</b> |
|--------------------------------------------------------|----------|-----------------------|--------------------|----------------|----------------|
| Without adjustment for missing 2011 data               | 837      | 148                   | -21.9              | -35.5 to -8.4  | 0.002          |
| With adjustment for missing 2011 data                  | 837      | 148                   | -25.1              | -39.1 to -11.0 | 0.001          |

**Table E. Association of operating margin with outcomes and process measures.** Adjusted regression analyses as per table 3 in the manuscript excluding Trusts that had changed in composition between 2011 and 2016. Abbreviations: A&E, Accident & Emergency; SHMI, Summary Hospital-level Mortality Indicator.

| <b>Outcome</b>                                  | <b>n</b> | <b>Trust clusters</b> | <b>Coefficient</b> | <b>95% CI</b>  | <b>p-value</b> |
|-------------------------------------------------|----------|-----------------------|--------------------|----------------|----------------|
| Readmission rate (%)                            | 344      | 119                   | -0.01              | -0.03 to 0.01  | 0.403          |
| Inpatient satisfaction score (out of 10)        | 706      | 119                   | 0.66               | -0.23 to 1.55  | 0.142          |
| A&E 4 hour breach rate (%)                      | 710      | 119                   | -0.20              | -0.30 to -0.11 | <0.001         |
| Delayed transfers of care days per hospital bed | 711      | 119                   | -29.5              | -44.1 to -14.8 | <0.001         |
| 2 week wait cancer target adherence (%)         | 710      | 119                   | 0.05               | 0.00 to 0.10   | 0.042          |
| 62 day cancer treatment target adherence (%)    | 710      | 119                   | 0.12               | 0.02 to 0.23   | 0.018          |

Figure A. Putative interplay of factors affecting Trust finance and performance.

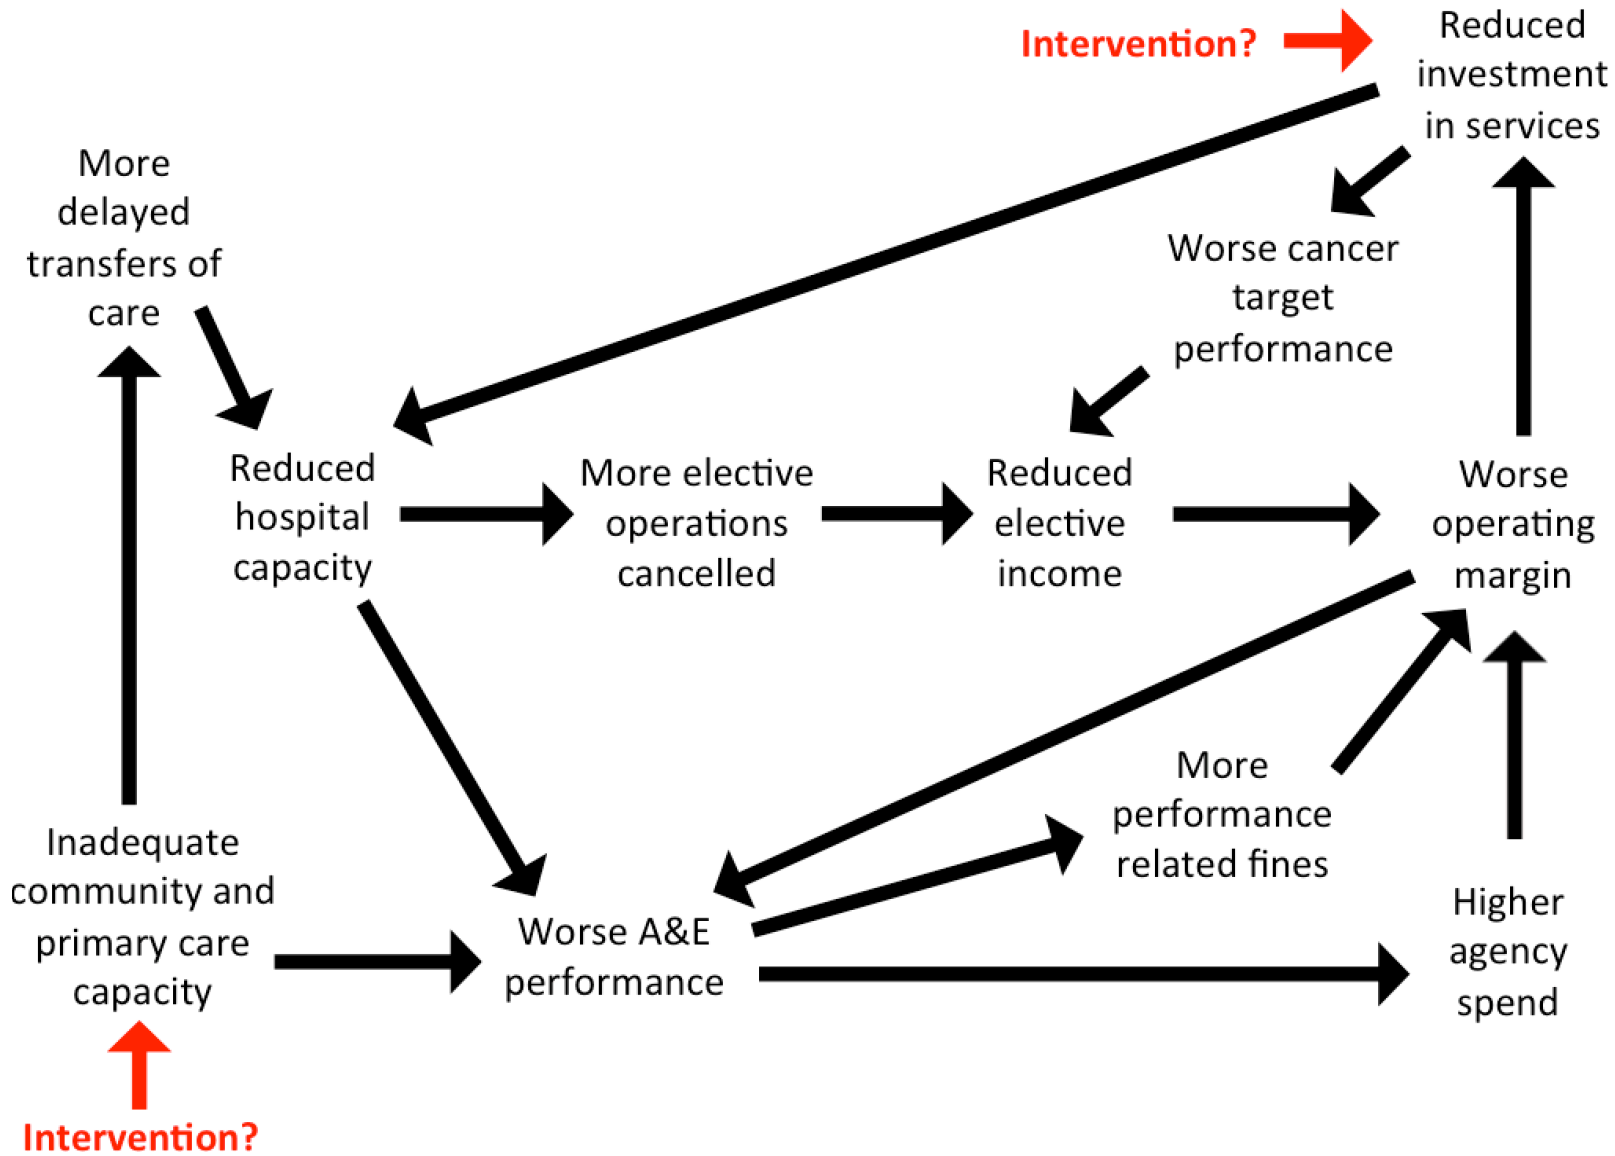

Supplement: bmjopen-2018-021854supp001.pdf [file bmjopen-2018-021854supp001.pdf]
