# Supplementary material for: Financial performance of English NHS trusts and variation in clinical outcomes: a longitudinal observational study
Source: PubMed Central journal article supplement — BMJ Open. 2019 Jan 28;9(1):e021854. doi: 10.1136/bmjopen-2018-021854 (PMC6352807; doi:10.1136/bmjopen-2018-021854), 2019-01-28
Supplement: bmjopen-2018-021854.draft_revisions.pdf [file bmjopen-2018-021854.draft_revisions.pdf]

# BMJ Open

BMJ Open is committed to open peer review. As part of this commitment we make the peer review history of every article we publish publicly available.

When an article is published we post the peer reviewers' comments and the authors' responses online. We also post the versions of the paper that were used during peer review. These are the versions that the peer review comments apply to.

The versions of the paper that follow are the versions that were submitted during the peer review process. They are not the versions of record or the final published versions. They should not be cited or distributed as the published version of this manuscript.

BMJ Open is an open access journal and the full, final, typeset and author-corrected version of record of the manuscript is available on our site with no access controls, subscription charges or pay-per-view fees (<http://bmjopen.bmj.com>).

If you have any questions on BMJ Open's open peer review process please email [info.bmjopen@bmj.com](mailto:info.bmjopen@bmj.com)

# BMJ Open

## Financial Performance of English NHS Trusts and Variation in Clinical Outcomes: A Longitudinal Observational Study

|                               |                                                                                                                                                                                                                                                                                                                                                                                                                   |
|-------------------------------|-------------------------------------------------------------------------------------------------------------------------------------------------------------------------------------------------------------------------------------------------------------------------------------------------------------------------------------------------------------------------------------------------------------------|
| Journal:                      | <i>BMJ Open</i>                                                                                                                                                                                                                                                                                                                                                                                                   |
| Manuscript ID                 | bmjopen-2018-021854                                                                                                                                                                                                                                                                                                                                                                                               |
| Article Type:                 | Research                                                                                                                                                                                                                                                                                                                                                                                                          |
| Date Submitted by the Author: | 22-Jan-2018                                                                                                                                                                                                                                                                                                                                                                                                       |
| Complete List of Authors:     | Nagendran, Myura; Imperial College London, Division of Anaesthetics, Pain Medicine and Intensive Care<br>Kiew, Grace; North West Anglia NHS Foundation Trust<br>Raine, Rosalind; University College London, Department of Applied Health Care<br>Atun, Rifat; Harvard University, Harvard School of Public Health<br>Maruthappu, Mahiben; University College London, Department of Epidemiology and Public Health |
| Keywords:                     | hospital, finance, outcomes, process measures                                                                                                                                                                                                                                                                                                                                                                     |
|                               |                                                                                                                                                                                                                                                                                                                                                                                                                   |

SCHOLARONE™  
Manuscripts

View Only

# Financial Performance of English NHS Trusts and Variation in Clinical Outcomes: A Longitudinal Observational Study

Myura Nagendran, MRCP<sup>1</sup>

Grace Kiew, MB BChir<sup>2</sup>

Rosalind Raine, PhD<sup>3</sup>

Rifat Atun, FRCP<sup>4</sup>

Mahiben Maruthappu, BM BCh<sup>5</sup>

1. Honorary Clinical Research Fellow, Division of Anaesthetics, Pain Medicine and Intensive Care, Imperial College London, UK
2. Foundation Doctor, North West Anglia NHS Foundation Trust, Peterborough, UK
3. Professor, Department of Applied Health Care, University College London, UK
4. Professor, Harvard T.H. Chan School of Public Health, Harvard University, Boston, MA, USA
5. Public Health Registrar, Department of Epidemiology and Public Health, University College London, UK

**Manuscript version:** 3·5

**Date of version:** 22 January 2018

**Corresponding author:** Dr. Mahiben Maruthappu  
Academic Clinical Fellow in Public Health  
Department of Epidemiology and Public Health  
University College London, UK

**E-mail:** [mahiben.maruthappu@nhs.net](mailto:mahiben.maruthappu@nhs.net)

**Phone:** + 44 7535 184 912

## ABSTRACT

### Objectives

To examine the association between financial performance as measured by operating margin (surplus/deficit as a proportion of turnover) and clinical outcomes in English NHS trusts.

### Setting

Longitudinal, observational study in 149 acute NHS trusts in England between 2011 and 2016.

### Participants

Our analysis focused on the outcomes at individual NHS Trust-level (composed of one or more acute hospitals).

### Primary and secondary outcomes

Outcome measures included readmissions, inpatient satisfaction score and the following process measures: emergency department (A&E) waiting time targets, cancer referral and treatment targets, and delayed transfers of care.

### Results

There was a progressive increase in the proportion of trusts in financial deficit: 22% in 2011, 27% in 2012, 28% in 2013, 51% in 2014, 68% in 2015 and 91% in 2016. In linear regression analyses, there was no significant association between operating margin and clinical outcomes (readmission rate or inpatient satisfaction score). There was, however, a significant association between operating margin and process measures (delayed transfers of care, A&E breaches and cancer waiting time targets). Between the best and worst financially performing Trusts, there was an approximately 2-fold increase in A&E breaches and delayed transfers of care overall although this variation decreased over the six years. Despite significant differences between the best and worst performing trusts on cancer targets, the magnitude of difference was much smaller (1·16 and 1·15-fold), although the variation slowly rose during the six years.

### Conclusions

Operating margins in English NHS trusts progressively worsened during 2011-16, and this change was associated with poorer performance on several process measures but not with hospital readmissions or inpatient satisfaction. Significant variation exists between the best and worst financially performing Trusts. Further research is needed to examine the causal nature of relationships between financial performance, process measures and outcomes.

**STRENGTHS AND LIMITATIONS**

- To our knowledge, one of the first empirical exploratory analyses of the relationship between funding and outcomes in the English NHS
- Operating margin may not be the ideal measure of an organisation's financial position
- The proportion of activity at each Trust which is elective, acute or specialised was not taken into account nor was the percentage of activity subject to a national tariff
- There may be additional unmeasured confounders that have impacted the results
- This observational study is limited to demonstrating associations rather than causal links

## INTRODUCTION

The combination of higher demand due to ageing, growing populations, with more chronic illness and disability, in addition to rising treatment and technology costs, is driving increased health spending in high-income countries.<sup>1</sup> The National Health Service (NHS) in England is introducing policies to address these demands, attempting to contain costs while improving health outcomes. The NHS Five Year Forward View, published in October 2014, set out a strategic vision for sustaining a high-quality, comprehensive health system in England.<sup>2</sup> Specifically, it identified a £22 billion funding gap by 2020/21, based on the current funding trajectory of the NHS, to be met by ambitious efficiency savings of 2-3% annually (given a long-term track-record of 1% each year).

The call for increased efficiency comes in an austere climate, in which individual NHS Trusts are progressively challenged to achieve financial control,<sup>3,4</sup> while responding to high demand, especially in winter months, reported widely in the British media.<sup>5</sup> NHS Improvement, the body responsible for overseeing Trust performance, reported an overall third quarter deficit of £886 million for the 2016-17 financial year, £300 million higher than the planned target.<sup>6</sup> Higher demand for services, with rising emergency attendances and admissions, and delayed transfers of care (DTOCs), have been cited as key reasons for increasing deficit.<sup>7</sup> While control of Trust financial deficits is important for sustainability of the NHS, there are concerns on the adverse impact of worsening financial performance on clinical outcomes and processes,<sup>8</sup> but few studies which have explored this relationship.

We investigated the relationship between operating margin (surplus/deficit as a proportion of turnover) at English NHS Trusts during 2011-16, with outcomes and process measures. We selected performance measures that are commonly used for benchmarking performance of NHS Trusts and that are plausibly related to quality, namely, hospital readmissions, inpatient satisfaction scores, emergency department waiting time targets, cancer referral and treatment targets, and delayed transfers of care. Lastly, we investigated the variation in outcome and process measures between the financially best and worst performing Trusts, both overall and over time.

## METHODS

### Data sources and extraction

NHS Hospitals in England are categorised into financially and operationally distinct legal entities known as Trusts, which deliver services on behalf of the NHS. Trusts may be located at multiple sites and can be responsible for one or more hospitals. Well-performing Trusts are able to gain Foundation status, which allows a degree of financial and operational autonomy from the Department of Health. Data was sought for acute NHS Trusts in the 6-year period encompassing the financial years from April 2010 to March 2016.

We obtained financial data for Trusts from the gov.uk open data portal.<sup>9</sup> Where information was lacking for specific Trusts, we sought the original data from the published accounts available on individual Trust websites or from NHS 'The Quarter' reports.<sup>10</sup>

Data on four financial metrics were extracted and examined: first, the retained surplus/deficit for the financial year; second, the turnover for the Trust (calculated as "Revenue from patient care activities" and "Other operating revenue"); third, trust spend on agency staff, and fourth, spend on consultancy. The precise table IDs and sub-codes for extraction are detailed in the online Supplementary Appendix. Only the first two metrics are measures of financial performance. The second two reflect Trust spending choices and we included these as exploratory variables given the public and media interest in rising agency and consultancy spend.

Bed availability for the quarter preceding the end of each financial year was obtained from publicly available NHS England data<sup>11</sup> with occupancy rate calculated as the percentage of beds (as a proportion of total available) occupied on average during that quarter. Teaching status of the trusts was defined dichotomously on the basis of membership of The Association of UK University Hospitals.<sup>12</sup> For each NHS Trust, the postcode of the Trust was extracted and used as a proxy for location to calculate the region of the country in which the trust hospitals were located.

1 This postcode data were matched to the 2015 Indices of Multiple Deprivation (IMD) score.<sup>13</sup> The Office  
2 for National Statistics uses UK census data to generate the IMD score which encompasses census  
3 information from the following domains: income, employment, crime, living environment, health  
4 deprivation and disability, education and skills/training, barriers to housing and services.  
5  
6  
7  
8  
9

10 Using publicly available NHS England datasets, we obtained data on hospital activity in the form of  
11 number of annual admissions per Trust and annual outpatient attendances.<sup>14</sup> Data on last-minute  
12 elective operation cancellations (for non-clinical reasons) and the number of such patients not being  
13 treated within 28 days of such a cancellation were also extracted from publicly available NHS England  
14 datasets.<sup>14</sup>  
15  
16  
17  
18  
19  
20  
21  
22

### 23 **Outcome measures**

24 The outcomes we measured consisted of two clinical measures and three process measures that are  
25 commonly used for benchmarking NHS Trusts and have plausible mechanisms for a relation to quality.  
26 We openly acknowledge that there are several other outcomes and process measures which may also  
27 relate to quality and could have been chosen. Our selection was based on a combination of logistical  
28 constraints (i.e. what data was publicly available) and an effort to include measures which are commonly  
29 used for benchmarking trusts and thereby also reported in the mainstream media.  
30  
31  
32  
33  
34  
35  
36  
37

38 The clinical measures were (i) the proportion of discharges readmitted as an emergency within 7 days of  
39 discharge and (ii) annual overall patient satisfaction for each trust using data from the National Adult  
40 Inpatient Survey compiled by the Care Quality Commission.<sup>15</sup> Data on readmissions was only available  
41 for the years 2014-16. The three process measures were: (i) Accident and Emergency (A&E) 4-hour  
42 waiting time breaches (ii) delayed transfers of care from an acute Trust, and (iii) cancer waiting time  
43 targets.  
44  
45  
46  
47  
48  
49  
50  
51

52 The first process measure, Accident and Emergency (A&E) 4-hour waiting time breaches, was defined  
53 as the percentage of patient attendances in type 1 departments (major A&E) who waited greater than  
54 four hours from arrival to admission, transfer or discharge.  
55  
56  
57  
58  
59  
60



1  
2  
3 The second process measure, a delayed transfer of care from an acute Trust, was said to occur when a  
4 patient was ready to depart from acute care but was still occupying a bed. These data were extracted as  
5 'total number of bed days attributed to delayed transfers of care' and standardised to number of beds  
6 available in the Trust. Delayed transfer of care data were only available for the latter eight months of the  
7 2011 financial year. To ensure comparability with other years, a 1.5x multiplier was applied for each trust  
8 in this financial year (see online Supplementary Appendix for further details). No other missing data in  
9 the study was imputed.  
10  
11  
12  
13  
14  
15  
16  
17

18 For the third process measure, cancer waiting time targets, we assessed two specific targets (a) the  
19 proportion of patients who received a first consultant appointment within two weeks of urgent referral for  
20 suspected cancer by their General Practitioner (GP) and (b) the proportion of patients who commenced  
21 a first treatment for cancer within 62 days of being urgently referred by their GP.  
22  
23  
24  
25  
26  
27

### 28 **Unit of analysis**

29  
30 Our analysis focused on the outcomes at individual NHS Trust-level (composed of one or more acute  
31 hospitals).  
32  
33  
34  
35

### 36 **Statistical analysis**

37  
38 Our financial metric of interest was the annual Trust operating margin. Similarly to prior literature,<sup>16,17</sup> we  
39 defined operating margin as the retained surplus (or deficit) for the Trust in a financial year divided by the  
40 turnover (turnover being calculated as "Revenue from patient care activities" and "Other operating  
41 revenue"). This value was winsorised to set all outliers beyond the 2.5<sup>th</sup> and 97.5<sup>th</sup> percentiles to the  
42 values at these percentiles. We first calculated summary statistics of the operating surplus/deficit and  
43 metrics of trust characteristics, breaking the sample into 4 groups of deciles by Trust margin.  
44  
45  
46  
47  
48  
49  
50  
51

52 As a second step, we compared the variation in process and outcome measures between the financially  
53 best and worst performing trusts as categorised by operating margin decile (highest versus lowest).  
54  
55

56 Third, we performed multiple linear regression with our outcomes as the dependent variable and the  
57  
58  
59  
60

1 following independent variables: operating margin, number of beds available and year. Each Trust in  
2 each year was treated as a separate observation with standard errors clustered by Trust to account for  
3 the non-independence of Trust-level data.  
4  
5  
6  
7

8 Fourth, we compared outcomes and process measures between 'struggling' and 'non-struggling' Trusts.  
9 For this purpose, a struggling Trust was defined as either: (i) in financial or quality special measures as  
10 of December 2016 or (ii) a Foundation Trust subject to enforcement actions by Monitor as of September  
11 2016. Fifth, we investigated the relationships between delayed transfers of care, cancelled elective  
12 operations, agency spend, A&E breaches and operating margin by assessing correlation between these  
13 variables over an early period (2011-12) and a late period (2015-16).  
14  
15  
16  
17  
18  
19  
20  
21

22 We performed sensitivity analyses to assess the impact of (i) adjustment for missing 2011 delayed  
23 transfer of care data and (ii) inclusion of Trusts that had changed in composition during the study period.  
24  
25  
26  
27

28 All reported  $p$ -values are two sided with the statistical significance threshold set to a  $p$ -value of less than  
29 0.05. Given the hypothesis generating nature of this study, no corrections were made for multiple  
30 comparisons. Approximately 1 in every 20 comparisons could be expected to achieve statistical  
31 significance by chance alone. All analyses were performed using STATA statistical software version 12.1  
32 (College Station, TX). This study had no external funding source.  
33  
34  
35  
36  
37  
38  
39

#### 40 **Patient involvement**

41 Patients were not involved in any aspect of the study design, conduct or in the development of the  
42 research question or outcome measures. This study was a retrospective longitudinal observational study  
43 of publicly available Trust-level data and therefore there was no active patient recruitment for data  
44 collection or requirement for ethical approval.  
45  
46  
47  
48  
49  
50  
51  
52  
53  
54  
55  
56  
57  
58  
59  
60

## RESULTS

Over the 6-year period of study, encompassing the financial years from April 2010 to March 2016, there were changes in the composition to 31 of 149 Trusts. These are detailed in the online Supplementary Appendix and took the form of creation of a new Trust, dissolution of an existing Trust, acquisitions of a hospital or entire Trust to another Trust and mergers between Trusts. 13 Trusts (9%) transitioned to Foundation Status during the 6-year study period. Of the remaining 136 Trusts, 63 (42%) were non Foundation Trusts and 73 (49%) were Foundation Trusts.

There was a progressive increase in the proportion of Trusts in deficit over the 6-year study period: 22% in 2011, 27% in 2012, 28% in 2013, 51% in 2014, 68% in 2015 and 91% in 2016. The distribution of average operating surplus/deficit over the study period is displayed in Figure 1. Operating surplus/deficit varied widely across Trusts ranging from -£250 million to £181 million over the six years. Median operating surplus/deficit over the study period was -£3.8 million (IQR -£8.7 million to -£0.7 million, range -£63.1 million to £32.6 million). Median operating margin over the study period was -1.1% (IQR -2.7% to -0.2%, range -42.5% to 4.6%). Median operating margin was higher in teaching Trusts compared to non-Teaching Trusts (-0.5% versus -1.4%,  $p=0.002$ ) and lowest in the Midlands compared to other regions (-2.3% in the Midlands, -1.2% in London, -0.8% in the South, -1.0% in the North;  $p=0.028$ ).

During the 6-year study period, there was a nationwide decline in overnight general and acute beds from 110,568 to 103,422 (6.5% reduction) with a concomitant increase in day only beds from 11,572 to 12,207 (5.5% increase).

Trust metrics are shown in Table 1 stratified by decile of operating margin. Between the best and worst financially performing Trusts, there was an approximately 1.75-fold and 2-fold increase in agency and consultancy spend respectively as a proportion of turnover. The best financially performing Trusts also had a 1.5-fold higher annual number of outpatient attendances. In contrast, the annual number of admissions, bed occupancy rates and local deprivation scores were broadly similar between the best and worst performing Trusts. The proportion of Trusts with teaching status increased throughout deciles

1 of operating margin. Trends in the variation of operating margin over time with clinical outcomes and  
2 process measures are displayed in figures 2 and 3 respectively.  
3  
4  
5

6 Clinical outcomes and process measures, stratified by decile of operating margin, are shown in table 2.  
7  
8 Between the best and worst financially performing Trusts, there was an approximately 2-fold increase in  
9 A&E breach rates and delayed transfers of care. In contrast, despite significant differences between the  
10 best and worst performing trusts on cancer targets, the magnitude of difference was much smaller (both  
11 approximately 1·15-fold).  
12  
13  
14  
15

16  
17  
18 Trends in the variation between the best and worst financially performing Trusts over time for both  
19 clinical outcomes and process measures are shown in table 3. There was no appreciable variation in  
20 readmission rate or inpatient satisfaction score with the latter increasing over time at a slightly faster rate  
21 in the worst financially performing Trusts.  
22  
23  
24  
25

26  
27  
28 Performance on process measures in both the best and worst financially performing Trusts deteriorated  
29 over time (table 3). However, variation between the best and worst groups narrowed for A&E breaches,  
30 returned to baseline for delayed transfers of care after an initial rise, and rose slowly for both cancer  
31 target breaches. The variation in agency spend as a proportion of turnover between the best and worst  
32 financially performing trusts increased substantially between 2011 (best 2·7% and worst 3·9%,  
33 difference 1·2%) and 2016 (best 4·5% and worst 9·1%, difference 4·6%) (see online Supplementary  
34 Appendix for further details).  
35  
36  
37  
38  
39  
40  
41

42  
43  
44 In our linear regression analyses, there was no significant association between operating margin and  
45 clinical outcomes (readmission rate or inpatient satisfaction score; table 4). There was, however, a  
46 significant association between operating margin and process measures (delayed transfers of care, A&E  
47 breaches and cancer waiting time targets; table 4). Trusts defined as struggling (i.e. in special measures  
48 or subject to enforcement action) were associated with worse performance on all process measures but  
49 not with readmission rate or inpatient satisfaction scores (table 5).  
50  
51  
52  
53  
54  
55  
56  
57  
58  
59  
60

1 The associations between delayed transfers of care, elective surgery cancellations, agency spend, A&E  
2 breaches and operating margins are displayed in a correlation matrix for the early years (2011 and 2012;  
3 figure 4) and the later years (2015 and 2016; figure 5) of the six year study period (same scale applied to  
4 figure 4) and the later years (2015 and 2016; figure 5) of the six year study period (same scale applied to  
5 both figures 4 and 5). There was weak positive correlation between all factors except operating margin  
6 for which there was weak negative correlation with the other measures. These associations were  
7 maintained in the later years though with a greater spread among trusts.  
8  
9  
10  
11  
12  
13

14 Sensitivity analyses are reported in the online Supplementary Appendix. There was no change to the  
15 results with and without adjustment for missing 2011 delayed transfer of care data. There was no change  
16 to the results when excluding Trusts that had changed in composition over the study period.  
17  
18  
19  
20  
21  
22  
23  
24  
25  
26  
27  
28  
29  
30  
31  
32  
33  
34  
35  
36  
37  
38  
39  
40  
41  
42  
43  
44  
45  
46  
47  
48  
49  
50  
51  
52  
53  
54  
55  
56  
57  
58  
59  
60

## DISCUSSION

### Principal findings

Our study has a number of important findings. First, in the period 2011-16, there was a substantial increase in the proportion of NHS Trusts with negative operating margins. Second, the overall variation between the best and worst financially performing Trusts was considerably larger for A&E breach rates and delayed transfers of care than for cancer targets. Third, the variation over time between the best and worst financially performing trusts was static for clinical outcomes and mixed for process measures (decreased over the six years for A&E breaches, was static for delayed transfers of care while increasing slightly for cancer targets). Fourth, there was a significant association between worsened operating margin and deteriorating process measures (four-hour A&E targets, cancer waiting time targets and delayed transfers of care), but not between operating margin and either readmission rates or inpatient satisfaction scores.

### Comparison with other studies

The extant literature on the association between financial performance and outcomes comes primarily from the United States (US) and is mixed in pronouncement. Volpp and colleagues assessed the impact of a budget act reducing Medicare reimbursements on processes of care for acute myocardial infarction (MI).<sup>18</sup> They found that while the budget act added moderate financial strain to organisations, there was no appreciable worsening of care with respect to MI processes of care or mortality in 236,506 patients from 208 hospitals. An analysis by Bazzoli and colleagues in 2008 concluded that while there may be an association between some measures of financial performance and adverse events, it was much weaker than previously reported by Encinosa and Bernard who found a concerning association between frequency of patient safety alerts and operating margin.<sup>16,17</sup> Further, a study by Ly and colleagues in over 3,000 US hospitals found that low hospital margins were associated with worse processes of care and higher readmissions, although not with higher mortality.<sup>19</sup>

Placing our findings in the context of earlier studies requires extreme caution given the differences between the US and UK health systems. Specifically, Ly et al. excluded public hospitals (which comprise

1 the vast majority of English hospitals) from their analysis. However, these prior studies do highlight the  
2 difficulty in disentangling the relationship between financial performance and outcomes. Meanwhile, a  
3 large European cohort study revealed that attempts to save money by cutting nurse to patient ratios may  
4 adversely affect patient outcomes.<sup>20</sup> An increase in a nurses' workload by one patient increased the  
5 likelihood of a 30-day inpatient death by 7% (odds ratio 1.07, 95% CI 1.03 to 1.11).<sup>20</sup>  
6  
7  
8  
9

### 10 11 12 **Study limitations**

13 Our findings must be borne in light of several study limitations. First, while we had access to a  
14 considerable volume of data, the granularity of data was limited. For example, our unit of analysis was at  
15 the Trust level, giving a sample size of approximately 149 compared to equivalent US studies that have  
16 analysed over 3000 hospitals.<sup>19</sup> Lack of 'high-frequency' data also prevented us performing interrupted  
17 time-series and time-lag analyses.  
18  
19  
20  
21  
22  
23

24  
25  
26 Second, it may be that operating margin is not the ideal measure of an organisation's financial position.  
27 A Trust's deficit may be exaggerated if it realises that a deficit is unavoidable and careful accounting  
28 allows for a larger than necessary deficit in one year to ensure a small surplus in the following year (as  
29 opposed to two years of deficit); potential gamification. Organisations including NHS Improvement and  
30 the Department of Health typically use breakeven performance figures instead of operating  
31 surplus/deficits. We chose not to use such figures as the data were not easily available at Trust level for  
32 much of the period under investigation.  
33  
34  
35  
36  
37  
38  
39  
40

41  
42 Third, we utilised only a small selection of existing clinical outcomes and process. This decision was  
43 driven by two factors. Logistically, there is limited public access to many clinical outcomes. While there is  
44 access to many process measures, we opted for a small selection that is commonly used for  
45 benchmarking trusts (i.e. often quoted in media reports and receive major public scrutiny) so as to avoid  
46 the issues of multiple comparisons. It is entirely possible that other process measures may well display  
47 differing relationships with respect to operating margins.  
48  
49  
50  
51  
52  
53  
54  
55  
56  
57  
58  
59  
60

1 Fourth, we did not take into account the proportion of activity at each Trust which is elective, acute or  
2 specialised nor did we assess the percentage of activity subject to a national tariff. Work from the Health  
3 Foundation in 2016 suggests a link between financial performance and the proportion of Trust income  
4 arising from activities subject to the national tariff.<sup>21</sup> Although there is likely to be correlation between  
5 teaching hospital status (which we did assess) and the share of activity subject to a specialised services  
6 tariff, this is nonetheless a crude proxy.  
7  
8  
9  
10  
11  
12  
13

14 Fifth, there may be additional unmeasured confounders that have impacted on our results. For example,  
15 surrounding Primary Care systems may impact on the efficiency with which the acute Trusts function.  
16 We adjusted for hospital size in the form of number of beds as well as using operating margin as a more  
17 standardised measure of financial performance than gross surplus or deficit (as turnover showed wide  
18 variation between trusts). However, as with any observational research, we cannot fully discount the  
19 impact of confounding on our results. For example, financial underperformance may be a signal of  
20 general underperformance in a Trust where clinical and other functions that might be suboptimal affect  
21 outcomes. Sixth, we are limited to demonstrating associations rather than causal links.  
22  
23  
24  
25  
26  
27  
28  
29  
30  
31

### 32 **Conclusions and policy implications**

34 Notwithstanding limitations, our findings have important ramifications for clinical leads, managers and  
35 policy makers. The relationship between financial performance and clinical outcomes is far more  
36 complex and associated with myriad other factors which will vary among Trusts. Trusts with financial  
37 deficits may be spending more than they can afford and one could therefore argue that higher quality  
38 should be expected for this extra financial outlay. Conversely, the existence of such deficit might instead  
39 indicate reduced efficiency and challenged management. Alternatively, financial penalties due to poor  
40 clinical performance or financial management could exacerbate deficits. Attempts to redress this balance  
41 may inadvertently lead to reflex spending cuts and poorer quality care. The role of clinical leads,  
42 management and leadership within a Trust is likely to be a key contributor to how financial deficits impact  
43 quality of care.  
44  
45  
46  
47  
48  
49  
50  
51  
52  
53  
54  
55  
56  
57  
58  
59  
60



1 There are a number of specific points to consider also. First, there is substantial variation between  
2 Trusts, which in some cases is worsening. Between the best and worst financially performing Trusts,  
3 there are up-to 2-fold differences in agency spend, delayed transfers of care, A&E breaches and cancer  
4 waiting times. This is notable and needs to be explicitly tackled with greater efficacy. While national  
5 regulators such as the Care Quality Commission (CQC) and NHS Improvement do seek to support  
6 challenged Trusts, the effectiveness of this has not necessarily translated into improved performance  
7 metrics.  
8  
9  
10  
11  
12  
13

14  
15  
16 Second, the lack of significant association between operating margin and either readmissions or  
17 inpatient satisfaction may suggest that clinical outcomes are more resilient to financial pressures than  
18 process measures, or that the driver for such clinical metrics is not predominantly financial-based. Third,  
19 the recent narrowing of variation between the best and worst performing Trusts on the measures of A&E  
20 targets and delayed transfers of care, may be a cause for concern, suggesting that now even the best  
21 financially performing Trusts are struggling to manage demand. This indicates that a more system-wide  
22 approach to demand-management and improving Trust performance may be required to address the  
23 identified deteriorations, given the entire Trust cohort is now showing signs of deterioration. Stated  
24 plainly, it seems that even if best practice is adopted from the most well managed Trusts, demands on  
25 secondary and tertiary care may not be adequately addressed.  
26  
27  
28  
29  
30  
31  
32  
33  
34  
35  
36  
37

38 Finally, our inability to demonstrate causal links on the available macro level public data re-emphasises  
39 the need for higher quality interventional studies such as cluster randomised trials specifically assessing  
40 policy impacts before implementation en masse. Furthermore, studies assessing the micro level  
41 spending decisions by Trusts when confronted by financial pressures may also lend more insight into the  
42 causal pathway and suggest appropriate targets for intervention.  
43  
44  
45  
46  
47  
48  
49

## 50 **Summary**

51 Notwithstanding limitations, our results demonstrate that operating margins at English NHS Trusts have  
52 progressively worsened over 2011-16, and that this change correlates with poorer Trust performance on  
53 a range of widely benchmarked process measures, but not significantly with readmissions or inpatient  
54  
55  
56  
57  
58  
59

1 satisfaction. The variation between the best and worst financially performing Trusts was considerably  
2 larger for A&E breach rates and delayed transfers of care than for cancer targets but showed differing  
3 patterns of variation over time. The causal nature of relationships between financial performance,  
4 process measures and outcomes remains difficult to disentangle.  
5  
6  
7  
8  
9  
10  
11  
12  
13  
14  
15  
16  
17  
18  
19  
20  
21  
22  
23  
24  
25  
26  
27  
28  
29  
30  
31  
32  
33  
34  
35  
36  
37  
38  
39  
40  
41  
42  
43  
44  
45  
46  
47  
48  
49  
50  
51  
52  
53  
54  
55  
56  
57  
58  
59  
60

## RESEARCH IN CONTEXT

### Evidence before this study

We searched the scientific literature to identify original research articles assessing the macro-level association between financial performance and outcomes in the NHS and how such outcomes vary between the best and worst financially performing Trusts. We searched PubMed for manuscripts published in any language up to and including August 15<sup>th</sup> 2017, using the following search terms: ("NHS"[Ti] OR "National health service"[Ti] OR ("English"[Ti] AND "Hospital"[Tiab])) AND ("Variation"[Tiab] or "Outcome"[Tiab]). 550 records were retrieved but none were deemed includable.

### Added value of this study

Most of the extant literature comes from the United States and direct comparison is fraught with difficulty. Our study is the largest analysis to date of the association between financial performance, as measured by operating margin, and outcomes at English NHS Trusts. Operating margins in English NHS trusts progressively worsened during 2011-16, and this change was associated with poorer performance on several process measures but not with hospital readmissions or inpatient satisfaction. Significant variation exists between the best and worst financially performing Trusts.

### Implications of all the available evidence

The causal nature of relationships between financial performance, process measures and outcomes remains problematic to entangle but specific findings from our study merit further consideration. The lack of significant association between operating margin and either readmissions or inpatient satisfaction may suggest that clinical outcomes are more resilient to financial pressures than process measures, or that the driver for such clinical metrics is not predominantly financial-based. The recent narrowing of variation between the best and worst performing Trusts on the measures of A&E targets and delayed transfers of care, may be a cause for concern, suggesting that now even the best financially performing Trusts are struggling to manage demand.

## CONTRIBUTORSHIP

MN and MM conceived the study. RR and RA had critical input into study direction and interpretation. MN and GK extracted and sorted data for the study. MN performed the analysis and wrote the first draft of the manuscript. All authors (MN, GK, RR, RA, MM) contributed to critical revision of the manuscript for important intellectual content and approved the final version. MN and MM are the guarantors.

## ACKNOWLEDGEMENTS

Nil.

## DECLARATION OF INTERESTS

All authors have completed the ICMJE uniform disclosure at [ww.icmje.org/coi\\_disclosure.pdf](http://www.icmje.org/coi_disclosure.pdf). Mahiben Maruthappu serves as NHS England's Innovation Adviser. All authors declare no support from any organisation for the submitted work, no financial relationships with any organisations that might have an interest in the submitted work in the previous three years and no other relationships or activities that could appear to have influenced the submitted work.

## FUNDING

No specific funding for this study.

## SPONSOR

No sponsor for this study.

## DATA SHARING

Raw data and analysis available on request from authors.

## TRANSPARENCY STATEMENT

The study guarantors (MN and MM) affirm that the manuscript is an honest, accurate, and transparent account of the study being reported; that no important aspects of the study have been omitted; and that any discrepancies from the study as planned have been explained.

1  
2  
3  
4  
5  
6  
7  
8  
9  
10  
11  
12  
13  
14  
15  
16  
17  
18  
19  
20  
21  
22  
23  
24  
25  
26  
27  
28  
29  
30  
31  
32  
33  
34  
35  
36  
37  
38  
39  
40  
41  
42  
43  
44  
45  
46  
47  
48  
49  
50  
51  
52  
53  
54  
55  
56  
57  
58  
59  
60

**ETHICS**

No ethical approval required as retrospective longitudinal observational study of publicly available Trust-level data.

For peer review only

**REFERENCES**

1. Lorenzoni L, Belloni A, Sassi F. Health-care expenditure and health policy in the USA versus other high-spending OECD countries. *Lancet* 2014; 384(9937): 83-92.
2. NHS England. Five Year Forward View. 2014. Available online at: <http://www.england.nhs.uk/wp-content/uploads/2014/10/5yfv-web.pdf> (last accessed 29 August 2017).
3. Gulland A. NHS chief warns of more financial challenges. *BMJ* 2017; 356: J212.
4. NHS Improvement. 10 ways for NHS providers to find savings and make cost improvements. 2016. Available online at: [https://improvement.nhs.uk/uploads/documents/FIP\\_-\\_where\\_to\\_look\\_to\\_make\\_NHS\\_savings.pdf](https://improvement.nhs.uk/uploads/documents/FIP_-_where_to_look_to_make_NHS_savings.pdf) (last accessed 29 August 2017).
5. Campbell D, Morris S, Marsh S. NHS faces 'humanitarian crisis' as demand rises, British Red Cross warns. 2017. Available online at: <https://www.theguardian.com/society/2017/jan/06/nhs-faces-humanitarian-crisis-rising-demand-british-red-cross> (last accessed 29 August 2017).
6. NHS Improvement. Quarterly performance of the NHS provider sector: quarter 3 2016/17. 2017. Available online at: <https://improvement.nhs.uk/resources/quarterly-performance-nhs-provider-sector-quarter-3-1617/> (last accessed 29 August 2017).
7. NHS England. NHS England Business Plan. 2016. Available online at: <https://www.england.nhs.uk/wp-content/uploads/2016/03/bus-plan-16.pdf> (last accessed 29 August 2017).
8. Hopson C. We need to be honest and realistic about what is deliverable at the NHS front line. 2017. Available online at: <http://blogs.bmj.com/bmj/2017/01/29/chris-hopson-we-need-to-be-honest-and-realistic-about-what-is-deliverable-at-the-nhs-front-line/> (last accessed 29 August 2017).
9. Gov.uk. NHS trusts accounts data for 2015 to 2016. 2016. Available online at: <https://www.gov.uk/government/publications/nhs-trusts-accounts-data-for-2015-to-2016> (last accessed 29 August 2017).
10. Gov.uk. The Quarter, quarter 4 2010/11. 2011. Available online at: <https://www.gov.uk/government/publications/the-quarter-quarter-4-2010-11> (last accessed 29 August 2017).
11. NHS England. Bed Availability and Occupancy. 2017. Available online at: <https://www.england.nhs.uk/statistics/statistical-work-areas/bed-availability-and-occupancy/> (last accessed 29 August 2017).
12. Association of UK University Hospital Trusts. List of AUKUH Members. 2016. Available online at: <http://www.aukuh.org.uk/index.php/members/aukuh-members> (last accessed 29 August 2017).
13. Gov.uk. English indices of deprivation 2015. 2015. Available online at: <https://www.gov.uk/government/statistics/english-indices-of-deprivation-2015> (last accessed 29 August 2017).
14. NHS England. Statistical Work Areas. 2017. Available online at: <https://www.england.nhs.uk/statistics/statistical-work-areas/> (last accessed 29 August 2017).

- 1 15. NHS Surveys. Current surveys. 2017. Available online at: <http://www.nhssurveys.org/surveys>  
2 (last accessed 29 August 2017).
- 3 16. Bazzoli GJ, Chen HF, Zhao M, Lindrooth RC. Hospital financial condition and the quality of  
4 patient care. *Health Econ* 2008; 17(8): 977-95.
- 5 17. Encinosa WE, Bernard DM. Hospital finances and patient safety outcomes. *Inquiry* 2005; 42(1):  
6 60-72.
- 7 18. Volpp KG, Konetzka RT, Zhu J, Parsons L, Peterson E. Effect of cuts in Medicare reimbursement  
8 on process and outcome of care for acute myocardial infarction patients. *Circulation* 2005; 112(15):  
9 2268-75.
- 10 19. Ly DP, Jha AK, Epstein AM. The association between hospital margins, quality of care, and  
11 closure or other change in operating status. *J Gen Intern Med* 2011; 26(11): 1291-6.
- 12 20. Aiken LH, Sloane DM, Bruyneel L, et al. Nurse staffing and education and hospital mortality in  
13 nine European countries: a retrospective observational study. *Lancet* 2014; 383(9931): 1824-30.
- 14 21. The Health Foundation . System-wide problems driving NHS deficit. 2016. Available online at:  
15 <http://www.health.org.uk/news/system-wide-problems-driving-nhs-deficit> (last accessed 29 August 2017).
- 16
- 17
- 18
- 19
- 20
- 21
- 22
- 23
- 24
- 25
- 26
- 27
- 28
- 29
- 30
- 31
- 32
- 33
- 34
- 35
- 36
- 37
- 38
- 39
- 40
- 41
- 42
- 43
- 44
- 45
- 46
- 47
- 48
- 49
- 50
- 51
- 52
- 53
- 54
- 55
- 56
- 57
- 58
- 59
- 60

## FIGURE LEGENDS

**Figure 1. Distribution of average operating surplus/deficit over the 2011-16 period.**

**Figure 2. Trends in operating margin and clinical outcomes over time.**

**Figure 3. Trends in operating margin and process measures over time.** Abbreviations: A&E, Accident & Emergency.

**Figure 4. 2011-12 correlation between delayed transfers of care, elective operation cancellations, agency spend, A&E breaches and operating margin.** Elective surgery cancellations are last-minute elective operation cancellations (for non-clinical reasons) standardised in this figure to number of available beds at the Trust (as a proxy for hospital capacity). Agency spend is displayed as a proportion of turnover. Operating margin is as defined in study methods. Abbreviations: A&E, Accident & Emergency; DTOC, delayed transfer of care.

**Figure 5. 2015-16 correlation between delayed transfers of care, elective operation cancellations, agency spend, A&E breaches and operating margin.** Elective surgery cancellations are last-minute elective operation cancellations (for non-clinical reasons) standardised in this figure to number of available beds at the Trust (as a proxy for hospital capacity). Agency spend is displayed as a proportion of turnover. Operating margin is as defined in study methods. Abbreviations: A&E, Accident & Emergency; DTOC, delayed transfer of care.



**TABLE LEGENDS**

**Table 1. Trust metrics by decile of operating margin.**

**Table 2. Outcomes and process measures by decile of operating margin.** Values are median (IQR).

Abbreviations: A&E, Accident & Emergency.

**Table 3. Variation in outcomes and process measures over time by financial performance.** 'Best 10%' refers to Trusts with operating margins in the top 10% of the sample. 'Worst 10%' refers to Trusts with operating margins in the bottom 10% of the sample.

**Table 4. Association of operating margin with outcomes and process measures.** Abbreviations: A&E, Accident & Emergency; CI, confidence interval.

**Table 5. Outcomes and process measures in trusts struggling (i.e. in special measures or subject to enforcement action) versus those that are not.** Values are median (IQR).

Table 1. Trust metrics by decile of operating margin.

|                                                                 | Operating margin       |                      |                     |                   |
|-----------------------------------------------------------------|------------------------|----------------------|---------------------|-------------------|
|                                                                 | Bottom 10%             | 11-50%               | 51-89%              | Top 10%           |
| <b>Operating surplus / deficit (£ millions, median (range))</b> | -30.9 (-61.1 to -12.4) | -6.3 (-63.1 to -1.2) | -1.5 (-13.8 to 6.8) | 5.4 (1.3 to 32.6) |
| <b>Agency spend as proportion of turnover (%)</b>               | 6.9 (2.0)              | 4.8 (2.4)            | 3.8 (2.0)           | 3.9 (1.2)         |
| <b>Consultancy spend as proportion of turnover (%)</b>          | 0.96 (0.54)            | 0.44 (0.35)          | 0.45 (0.74)         | 0.46 (0.29)       |
| <b>Annual admissions, mean (SD)</b>                             | 26,978 (9,698)         | 29,006 (13,326)      | 36,411 (21,300)     | 30,445 (12,455)   |
| <b>Annual outpatient attendances, mean (SD)</b>                 | 271,508 (109,938)      | 295,223 (142,784)    | 374,266 (210,861)   | 407,595 (209,956) |
| <b>Bed availability, mean (SD)</b>                              | 716 (267)              | 718 (321)            | 822 (387)           | 740 (226)         |
| <b>Bed occupancy (%)</b>                                        | 90.1                   | 88.3                 | 87.2                | 88.1              |
| <b>Deprivation score, mean (SD)</b>                             | 23.4 (11.8)            | 19.2 (13.2)          | 23.3 (14.6)         | 23.5 (11.9)       |
| <b>Teaching trust (%)</b>                                       | 6.7                    | 17.0                 | 33.3                | 35.7              |
| <b>Region (%)</b>                                               |                        |                      |                     |                   |
| London                                                          | 20                     | 17                   | 17                  | 21                |
| South                                                           | 20                     | 17                   | 38                  | 7                 |
| Midlands                                                        | 40                     | 36                   | 15                  | 29                |
| North                                                           | 20                     | 31                   | 30                  | 43                |

**Table 2. Outcomes/process measures by decile of operating margin.**

|                                                               | Operating margin    |                     |                     |                     | p-value |
|---------------------------------------------------------------|---------------------|---------------------|---------------------|---------------------|---------|
|                                                               | Bottom 10%          | 11-50%              | 51-89%              | Top 10%             |         |
| <b>Readmission rate (%)</b>                                   | 3·6 (3·4 to 3·9)    | 3·6 (3·1 to 3·9)    | 3·7 (3·2 to 4·0)    | 3·3 (3·0 to 3·8)    | 0·137   |
| <b>Inpatient satisfaction score (out of 10)</b>               | 8·0 (7·8 to 8·2)    | 8·0 (7·8 to 8·2)    | 7·9 (7·7 to 8·1)    | 7·9 (7·7 to 8·2)    | <0·001  |
| <b>4 hour A&amp;E target breach rate (%)</b>                  | 10·2 (6·7 to 15·1)  | 6·7 (4·9 to 10·7)   | 5·3 (4·2 to 7·3)    | 5·3 (3·9 to 6·7)    | <0·001  |
| <b>Delayed transfer of care days per hospital bed</b>         | 11·1 (6·0 to 17·1)  | 7·4 (4·5 to 10·9)   | 6·5 (3·7 to 11·0)   | 5·7 (2·6 to 8·1)    | <0·001  |
| <b>Cancer two week wait target adherence (%)</b>              | 94·9 (93·2 to 96·2) | 95·5 (94·2 to 96·7) | 95·4 (94·4 to 96·7) | 95·6 (95·0 to 96·5) | 0·009   |
| <b>Cancer 62 days to first treatment target adherence (%)</b> | 86·2 (81·9 to 88·2) | 86·6 (83·6 to 89·1) | 87·6 (85·6 to 89·6) | 88·0 (86·3 to 89·9) | <0·001  |

Table 3. Variation in outcomes and process measures over time by financial performance.

| Readmissions (%)                                  |       |       |       |       |       |       |
|---------------------------------------------------|-------|-------|-------|-------|-------|-------|
|                                                   | 2011  | 2012  | 2013  | 2014  | 2015  | 2016  |
| <b>Worst 10%</b>                                  | -     | -     | -     | 3.6   | 3.7   | 3.8   |
| <b>Middle 80%</b>                                 | -     | -     | -     | 3.4   | 3.6   | 3.6   |
| <b>Best 10%</b>                                   | -     | -     | -     | 3.4   | 3.5   | 3.6   |
| <b>Ratio of worst to best</b>                     | -     | -     | -     | 1.1   | 1.0   | 1.1   |
| <b>Difference (best and worst)</b>                | -     | -     | -     | 0.2   | 0.1   | 0.2   |
| Inpatient satisfaction survey (score out of 10)   |       |       |       |       |       |       |
|                                                   | 2011  | 2012  | 2013  | 2014  | 2015  | 2016  |
| <b>Worst 10%</b>                                  | 7.5   | 7.7   | 7.9   | 7.9   | 8.0   | 8.0   |
| <b>Middle 80%</b>                                 | 7.7   | 7.8   | 7.9   | 8.0   | 8.1   | 8.1   |
| <b>Best 10%</b>                                   | 7.8   | 7.8   | 7.9   | 8.0   | 8.1   | 8.1   |
| <b>Ratio of worst to best</b>                     | 1.0   | 1.0   | 1.0   | 1.0   | 1.0   | 1.0   |
| <b>Difference (best and worst)</b>                | 0.3   | 0.1   | 0.0   | 0.1   | 0.1   | 0.1   |
| Accident & Emergency breach rate (%)              |       |       |       |       |       |       |
|                                                   | 2011  | 2012  | 2013  | 2014  | 2015  | 2016  |
| <b>Worst 10%</b>                                  | 8.2   | 6.4   | 7.8   | 7.8   | 11.9  | 13.6  |
| <b>Middle 80%</b>                                 | 5.2   | 4.9   | 6.0   | 6.3   | 9.3   | 12.0  |
| <b>Best 10%</b>                                   | 4.2   | 4.5   | 5.5   | 5.9   | 7.5   | 10.4  |
| <b>Ratio of worst to best</b>                     | 2.0   | 1.4   | 1.4   | 1.3   | 1.6   | 1.3   |
| <b>Difference (best and worst)</b>                | 4.0   | 1.9   | 2.3   | 1.9   | 4.4   | 3.2   |
| Delayed transfers of care days                    |       |       |       |       |       |       |
|                                                   | 2011  | 2012  | 2013  | 2014  | 2015  | 2016  |
| <b>Worst 10%</b>                                  | 5,077 | 6,657 | 7,248 | 6,972 | 7,813 | 8,284 |
| <b>Middle 80%</b>                                 | 4,851 | 5,082 | 5,558 | 6,046 | 7,311 | 8,044 |
| <b>Best 10%</b>                                   | 3,850 | 3,722 | 3,884 | 3,932 | 5,712 | 6,477 |
| <b>Ratio of worst to best</b>                     | 1.3   | 1.8   | 1.9   | 1.8   | 1.4   | 1.3   |
| <b>Difference (best and worst)</b>                | 1,227 | 2,935 | 3,364 | 3,040 | 2,101 | 1,807 |
| Cancer two week wait target breach rate (%)       |       |       |       |       |       |       |
|                                                   | 2011  | 2012  | 2013  | 2014  | 2015  | 2016  |
| <b>Worst 10%</b>                                  | 4.2   | 4.2   | 4.6   | 4.8   | 6.2   | 5.9   |
| <b>Middle 80%</b>                                 | 4.3   | 3.9   | 4.3   | 4.4   | 5.7   | 5.5   |
| <b>Best 10%</b>                                   | 4.6   | 4.1   | 4.0   | 4.6   | 5.9   | 5.2   |
| <b>Ratio of worst to best</b>                     | 0.9   | 1.0   | 1.2   | 1.0   | 1.1   | 1.1   |
| <b>Difference (best and worst)</b>                | -0.4  | 0.1   | 0.6   | 0.2   | 0.3   | 0.7   |
| Cancer 62 days to first treatment breach rate (%) |       |       |       |       |       |       |
|                                                   | 2011  | 2012  | 2013  | 2014  | 2015  | 2016  |
| <b>Worst 10%</b>                                  | 11.9  | 11.7  | 12.2  | 13.7  | 16.6  | 18.3  |
| <b>Middle 80%</b>                                 | 12.1  | 12.0  | 12.2  | 13.4  | 15.6  | 16.2  |
| <b>Best 10%</b>                                   | 11.9  | 11.7  | 10.0  | 11.7  | 13.5  | 15.2  |
| <b>Ratio of worst to best</b>                     | 1.0   | 1.0   | 1.2   | 1.2   | 1.2   | 1.2   |
| <b>Difference (best and worst)</b>                | 0.0   | 0.0   | 2.2   | 2.0   | 3.1   | 3.1   |

**Table 4. Impact of operating margin on outcomes and process measures.**

| Outcome                                         | n   | Trust clusters | Coefficient | 95% CI          | p-value |
|-------------------------------------------------|-----|----------------|-------------|-----------------|---------|
| Readmission rate (%)                            | 387 | 135            | -0.012      | -0.029 to 0.005 | 0.164   |
| Inpatient satisfaction score (out of 10)        | 825 | 148            | 0.80        | -0.06 to 1.67   | 0.067   |
| A&E 4 hour breach rate (%)                      | 835 | 148            | -0.24       | -0.33 to -0.15  | <0.001  |
| Delayed transfers of care days per hospital bed | 837 | 148            | -25.1       | -39.1 to -11.0  | 0.001   |
| 2 week wait cancer target adherence (%)         | 833 | 148            | 0.05        | 0.00 to 0.09    | 0.031   |
| 62 day cancer treatment target adherence (%)    | 833 | 148            | 0.12        | 0.03 to 0.21    | 0.009   |

**Table 5. Outcomes/process measures in trusts struggling (i.e. in special measures or subject to enforcement action) versus those that are not.**

|                                                        | Struggling trust    | Non-struggling trust | p-value |
|--------------------------------------------------------|---------------------|----------------------|---------|
| Readmission rate (%)                                   | 3.6 (3.1 to 3.9)    | 3.7 (3.1 to 3.9)     | 0.285   |
| Inpatient satisfaction score (out of 10)               | 7.9 (7.8 to 8.1)    | 7.9 (7.8 to 8.1)     | 0.378   |
| A&E 4 hour target breach rate (%)                      | 6.8 (5.2 to 10.2)   | 5.5 (4.2 to 8.3)     | <0.001  |
| Delayed transfer of care days per hospital bed         | 8.2 (4.5 to 11.9)   | 6.4 (4.0 to 10.4)    | 0.005   |
| Cancer two week wait target adherence (%)              | 95.1 (94.0 to 96.4) | 95.5 (94.4 to 96.8)  | 0.002   |
| Cancer 62 days to first treatment target adherence (%) | 86.6 (83.7 to 88.9) | 87.4 (84.8 to 89.6)  | 0.002   |

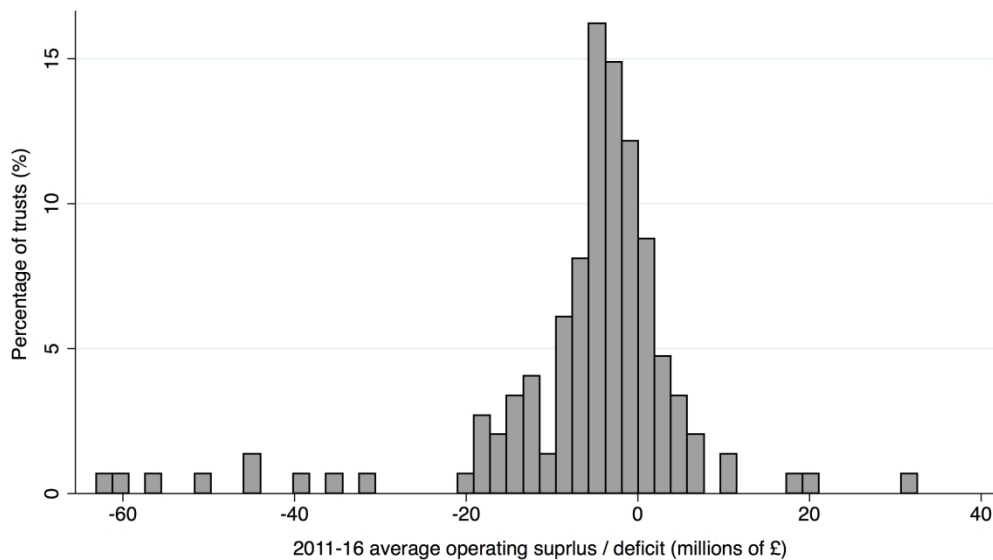

Figure 1. Distribution of average operating surplus/deficit over the 2011-16 period.

1  
2  
3  
4  
5  
6  
7  
8  
9  
10  
11  
12  
13  
14  
15  
16  
17  
18  
19  
20  
21  
22  
23  
24  
25  
26  
27  
28  
29  
30  
31  
32  
33  
34  
35  
36  
37  
38  
39  
40  
41  
42  
43  
44  
45  
46  
47  
48  
49  
50  
51  
52  
53  
54  
55  
56  
57  
58  
59  
60

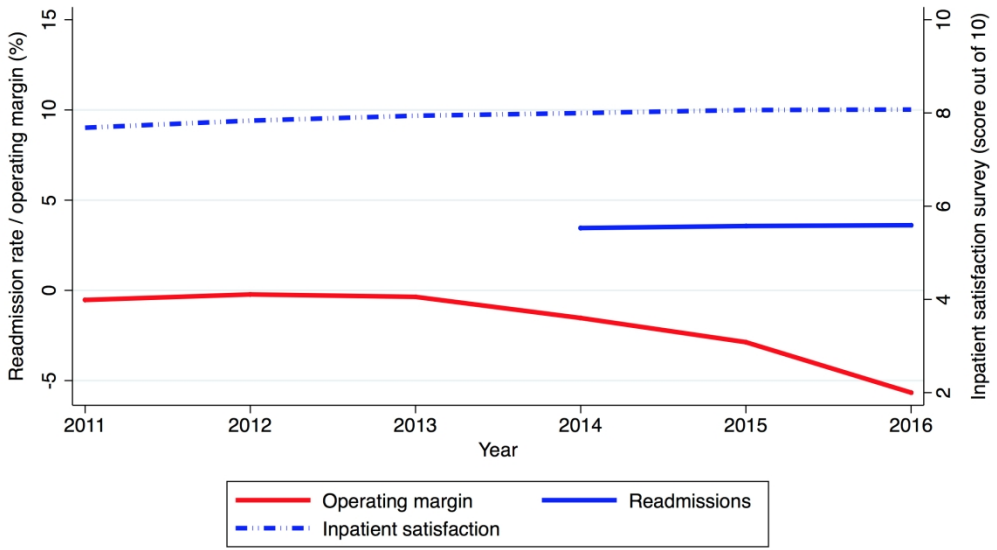

Figure 2. Trends in operating margin and clinical outcomes over time.

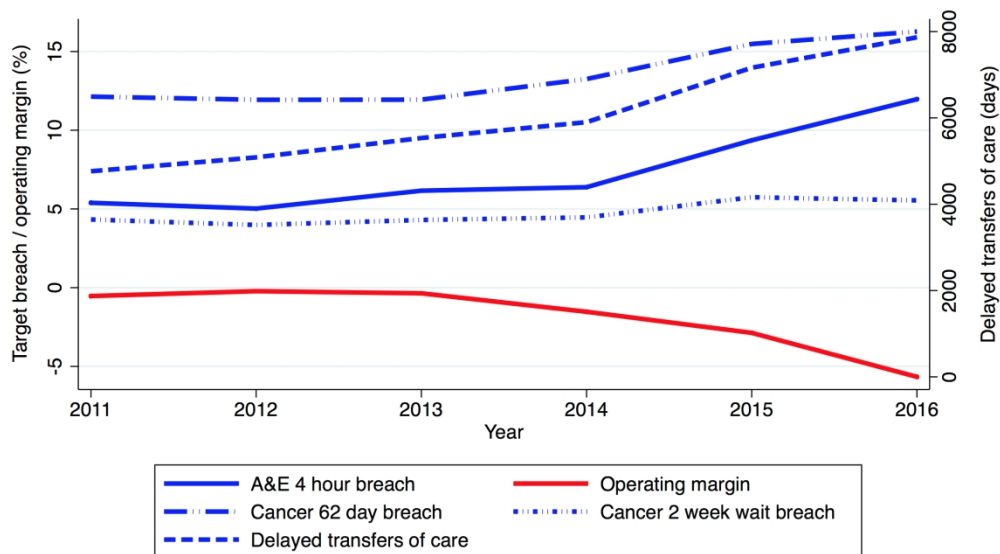

Figure 3. Trends in operating margin and process measures over time. Abbreviations: A&E, Accident & Emergency.



2011-12

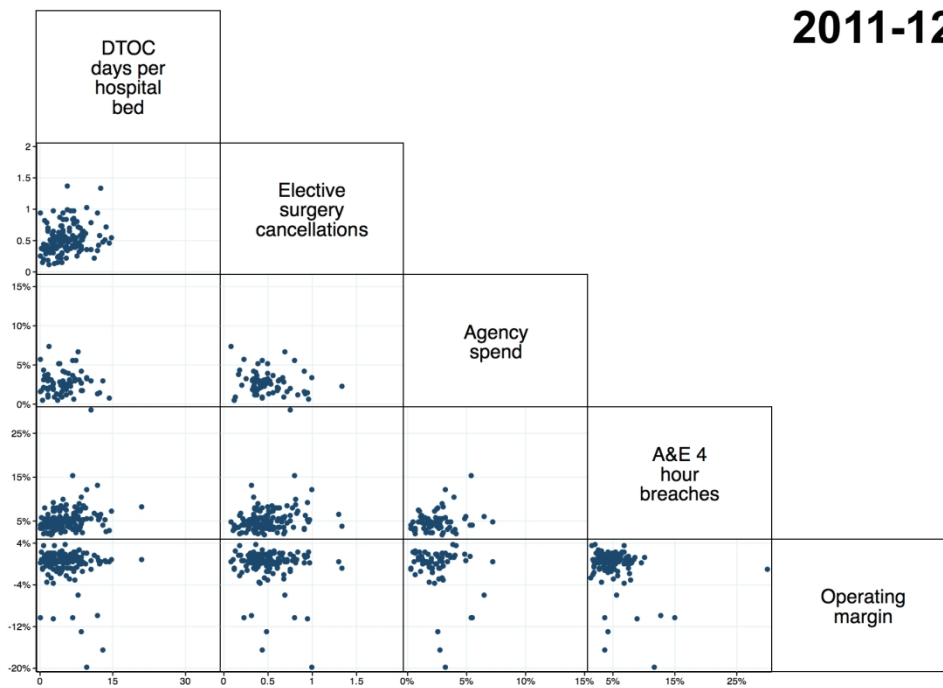

Figure 4. 2011-12 correlation between delayed transfers of care, elective operation cancellations, agency spend, A&E breaches and operating margin. Elective surgery cancellations are last-minute elective operation cancellations (for non-clinical reasons) standardised in this figure to number of available beds at the Trust (as a proxy for hospital capacity). Agency spend is displayed as a proportion of turnover. Operating margin is as defined in study methods. Abbreviations: A&E, Accident & Emergency; DTOC, delayed transfer of care.

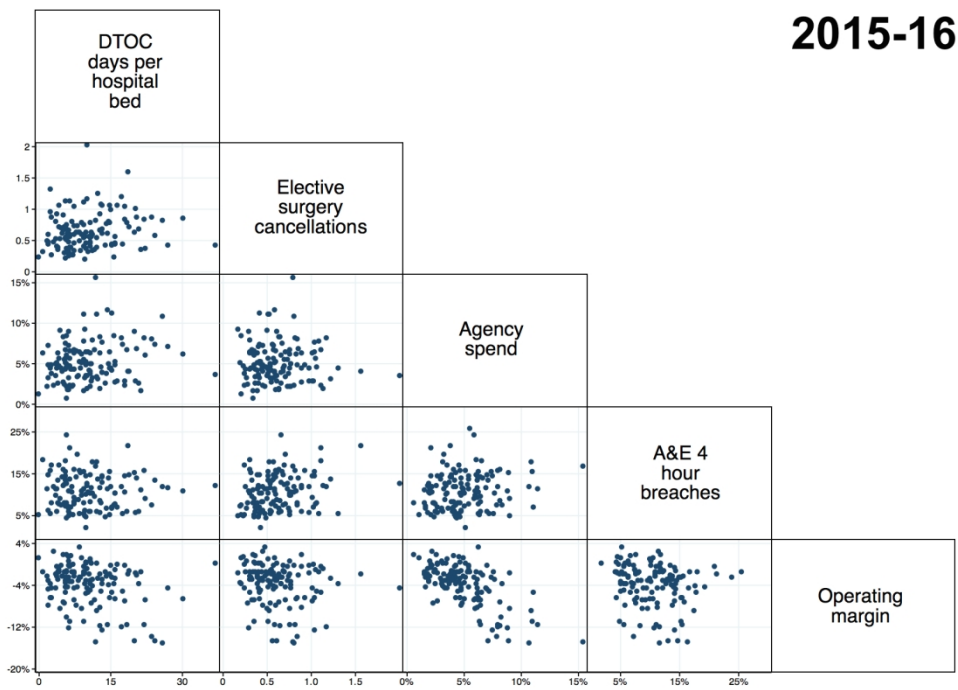

Figure 5. 2015-16 correlation between delayed transfers of care, elective operation cancellations, agency spend, A&E breaches and operating margin. Elective surgery cancellations are last-minute elective operation cancellations (for non-clinical reasons) standardised in this figure to number of available beds at the Trust (as a proxy for hospital capacity). Agency spend is displayed as a proportion of turnover. Operating margin is as defined in study methods. Abbreviations: A&E, Accident & Emergency; DTOC, delayed transfer of care.

# Financial Performance of English NHS Trusts and Clinical Outcomes: A Longitudinal Observational Study

## ONLINE SUPPLEMENTAL DATA

Myura Nagendran, MRCP<sup>1</sup>

Grace Kiew, MB BChir<sup>2</sup>

Rosalind Raine, PhD<sup>3</sup>

Rifat Atun, FRCP<sup>4</sup>

Mahiben Maruthappu, BM BCh<sup>5</sup>

1. Honorary Clinical Research Fellow, Division of Anaesthetics, Pain Medicine and Intensive Care, Imperial College London, UK
2. Foundation Doctor, North West Anglia NHS Foundation Trust, Peterborough, UK
3. Professor, Department of Applied Health Care, University College London, UK
4. Professor, Harvard T.H. Chan School of Public Health, Harvard University, Boston, MA, USA
5. Public Health Registrar, Department of Epidemiology and Public Health, University College London, UK

**Supplement version:** 2.1

## FINANCIAL DATA EXTRACTION

Where financial data was extracted from consolidated end of year accounts files via the gov.uk open data portal, the following fields were extracted:

### For foundation trusts:

Turnover --> Table ID 1, Subcode 100  
Surplus/Deficit --> Table ID 1, Subcode 160  
Consultancy --> 07A and 07I, subcode 280  
Agency spend --> 1415TRU06\_EXP\_P13, maincode 01, subcode 180

### For non-Foundation trusts:

Turnover --> Table ID CNE, Subcode 120 and 130  
Surplus/Deficit --> Table ID CNE, Subcode 390  
Consultancy --> 08C, subcode 125 (**only available for 2014-16**)  
Agency spend --> 1415TRU09\_EMP\_P13, maincode 04, subcode 100 (**only available for 2015-16**)

## 1 DELAYED TRANSFERS OF CARE IN FINANCIAL YEAR ENDING 2011

2  
3  
4 Delayed transfer of care data were only available at Trust level for the latter eight months of the  
5 2011 financial year. To ensure comparability with other years, a 1.5x multiplier was applied for  
6 each trust in this financial year with a sensitivity analysis to examine any impact of this change.  
7  
8

9  
10  
11 The total numbers of delayed transfers for all hospitals were available as an aggregate total  
12 (data obtained from King's Fund Quarterly Monitoring Report for 2010-11).  
13  
14

15  
16 The ratio of aggregate delayed transfer of care days for the first 4 months (April 2010 to July  
17 2010) to the last 8 months (August 2010 to March 2011) was 0.492; suggesting that a 1.5x  
18 multiplier appeared reasonable.  
19  
20  
21  
22

| Year | Month | Number of DTOCs | 4-monthly total |
|------|-------|-----------------|-----------------|
| 2010 | Apr   | 113900          | -               |
| 2010 | May   | 112442          | -               |
| 2010 | Jun   | 115336          | -               |
| 2010 | Jul   | 109918          | <b>451596</b>   |
| -    | -     | -               | -               |
| 2010 | Aug   | 115855          | -               |
| 2010 | Sep   | 113246          | -               |
| 2010 | Oct   | 113091          | -               |
| 2010 | Nov   | 116466          | <b>458658</b>   |
| -    | -     | -               | -               |
| 2010 | Dec   | 114346          | -               |
| 2011 | Jan   | 112386          | -               |
| 2011 | Feb   | 123130          | -               |
| 2011 | Mar   | 109362          | <b>459224</b>   |

## CHANGES TO TRUST COMPOSITION

The 168 Trusts listed below include specialist Trusts (e.g. Great Ormond Street Hospital for Children NHS Foundation Trust) that were excluded prior to analysis. Changes in composition to the Trusts (creation of a new Trust, dissolution of an existing Trust, acquisitions of a hospital or entire Trust to another Trust and mergers between Trusts) are detailed at the end of the table.

| Trust                                                           | Trust identifier | Change in composition | Transitioned to Foundation status | Foundation Trust transition date |
|-----------------------------------------------------------------|------------------|-----------------------|-----------------------------------|----------------------------------|
| Aintree University Hospital NHS Foundation Trust                | REM              |                       |                                   |                                  |
| Airedale NHS Foundation Trust                                   | RCF              |                       | Yes                               | 01/06/2010                       |
| Alder Hey Children's NHS Foundation Trust                       | RBS              |                       |                                   |                                  |
| Ashford and St Peter's Hospitals NHS Foundation Trust           | RTK              |                       | Yes                               | 01/12/2010                       |
| Barking, Havering and Redbridge University Hospitals NHS Trust  | RF4              |                       |                                   |                                  |
| Barnet and Chase Farm Hospitals NHS Trust                       | RVL              | Yes (1)               |                                   |                                  |
| Barnsley Hospital NHS Foundation Trust                          | RFF              |                       |                                   |                                  |
| Barts and the London NHS Trust                                  | RNJ              | Yes (2)               |                                   |                                  |
| Barts Health NHS Trust                                          | R1H              | Yes (3)               |                                   |                                  |
| Basildon and Thurrock University Hospitals NHS Foundation Trust | RDD              |                       |                                   |                                  |
| Bedford Hospital NHS Trust                                      | RC1              |                       |                                   |                                  |
| Birmingham Children's Hospital NHS Foundation Trust             | RQ3              |                       |                                   |                                  |
| Birmingham Women's NHS Foundation Trust                         | RLU              |                       |                                   |                                  |
| Blackpool Teaching Hospitals NHS Foundation Trust               | RXL              |                       |                                   |                                  |
| Bolton NHS Foundation Trust                                     | RMC              |                       |                                   |                                  |
| Bradford Teaching Hospitals NHS Foundation Trust                | RAE              |                       |                                   |                                  |
| Brighton and Sussex University Hospitals NHS Trust              | RXH              |                       |                                   |                                  |
| Buckinghamshire Healthcare NHS Trust                            | RXQ              |                       |                                   |                                  |

|    |                                                                |     |         |     |            |
|----|----------------------------------------------------------------|-----|---------|-----|------------|
| 1  | Burton Hospitals NHS Foundation Trust                          | RJF |         |     |            |
| 2  | Calderdale and Huddersfield NHS Foundation Trust               | RWY |         |     |            |
| 3  | Cambridge University Hospitals NHS Foundation Trust            | RGT |         |     |            |
| 4  | Central Manchester University Hospitals NHS Foundation Trust   | RW3 | Yes (4) |     |            |
| 5  | Chelsea and Westminster Hospital NHS Foundation Trust          | RQM | Yes (5) |     |            |
| 6  | Chesterfield Royal Hospital NHS Foundation Trust               | RFS |         |     |            |
| 7  | City Hospitals Sunderland NHS Foundation Trust                 | RLN |         |     |            |
| 8  | Colchester Hospital University NHS Foundation Trust            | RDE |         |     |            |
| 9  | Countess Of Chester Hospital NHS Foundation Trust              | RJR |         |     |            |
| 10 | County Durham and Darlington NHS Foundation Trust              | RXP |         |     |            |
| 11 | Croydon Health Services NHS Trust                              | RJ6 |         |     |            |
| 12 | Dartford and Gravesham NHS Trust                               | RN7 |         |     |            |
| 13 | Derby Teaching Hospitals NHS Foundation Trust                  | RTG |         |     |            |
| 14 | Doncaster and Bassetlaw Hospitals NHS Foundation Trust         | RP5 |         |     |            |
| 15 | Dorset County Hospital NHS Foundation Trust                    | RBD |         |     |            |
| 16 | Ealing Hospital NHS Trust                                      | RC3 | Yes (6) |     |            |
| 17 | East and North Hertfordshire NHS Trust                         | RWH |         |     |            |
| 18 | East Cheshire NHS Trust                                        | RJN |         |     |            |
| 19 | East Kent Hospitals University NHS Foundation Trust            | RVV |         |     |            |
| 20 | East Lancashire Hospitals NHS Trust                            | RXR |         |     |            |
| 21 | East Sussex Healthcare NHS Trust                               | RXC |         |     |            |
| 22 | Epsom and St Helier University Hospitals NHS Trust             | RVR |         |     |            |
| 23 | Frimley Health NHS Foundation Trust                            | RDU | Yes (7) |     |            |
| 24 | Gateshead Health NHS Foundation Trust                          | RR7 |         |     |            |
| 25 | George Eliot Hospital NHS Trust                                | RLT |         |     |            |
| 26 | Gloucestershire Hospitals NHS Foundation Trust                 | RTE |         |     |            |
| 27 | Great Ormond Street Hospital for Children NHS Foundation Trust | RP4 |         | Yes | 01/03/2012 |
| 28 | Great Western Hospitals NHS Foundation Trust                   | RN3 |         |     |            |
| 29 | Guy's and St Thomas' NHS Foundation Trust                      | RJ1 |         |     |            |
| 30 | Hampshire Hospitals NHS Foundation Trust                       | RN5 | Yes (8) |     |            |

|    |                                                               |     |          |     |            |
|----|---------------------------------------------------------------|-----|----------|-----|------------|
| 1  | Harrogate and District NHS Foundation Trust                   | RCD |          |     |            |
| 2  | Heart Of England NHS Foundation Trust                         | RR1 |          |     |            |
| 3  | Heatherwood and Wexham Park Hospitals NHS Foundation Trust    | RD7 | Yes (9)  |     |            |
| 4  | Hinchingbrooke Health Care NHS Trust                          | RQQ |          |     |            |
| 5  | Homerton University Hospital NHS Foundation Trust             | RQX |          |     |            |
| 6  | Hull and East Yorkshire Hospitals NHS Trust                   | RWA |          |     |            |
| 7  | Imperial College Healthcare NHS Trust                         | RYJ |          |     |            |
| 8  | Ipswich Hospital NHS Trust                                    | RGQ |          |     |            |
| 9  | Isle Of Wight NHS Trust                                       | R1F | Yes (10) |     |            |
| 10 | James Paget University Hospitals NHS Foundation Trust         | RGP |          |     |            |
| 11 | Kettering General Hospital NHS Foundation Trust               | RNQ |          |     |            |
| 12 | King's College Hospital NHS Foundation Trust                  | RJZ | Yes (11) |     |            |
| 13 | Kingston Hospital NHS Foundation Trust                        | RAX |          | Yes | 01/05/2013 |
| 14 | Lancashire Teaching Hospitals NHS Foundation Trust            | RXN |          |     |            |
| 15 | Leeds Teaching Hospitals NHS Trust                            | RR8 |          |     |            |
| 16 | Lewisham and Greenwich NHS Trust                              | RJ2 | Yes (12) |     |            |
| 17 | Liverpool Heart and Chest NHS Foundation Trust                | RBQ |          |     |            |
| 18 | Liverpool Women's NHS Foundation Trust                        | REP |          |     |            |
| 19 | London North West Healthcare NHS Trust                        | R1K | Yes (13) |     |            |
| 20 | Luton and Dunstable University Hospital NHS Foundation Trust  | RC9 |          |     |            |
| 21 | Maidstone and Tunbridge Wells NHS Trust                       | RWF |          |     |            |
| 22 | Medway NHS Foundation Trust                                   | RPA |          |     |            |
| 23 | Mid Cheshire Hospitals NHS Foundation Trust                   | RBT |          |     |            |
| 24 | Mid Essex Hospital Services NHS Trust                         | RQ8 |          |     |            |
| 25 | Mid Staffordshire NHS Foundation Trust                        | RJD | Yes (14) |     |            |
| 26 | Mid Yorkshire Hospitals NHS Trust                             | RXF |          |     |            |
| 27 | Milton Keynes University Hospital NHS Foundation Trust        | RD8 |          |     |            |
| 28 | Moorfields Eye Hospital NHS Foundation Trust                  | RP6 |          |     |            |
| 29 | Newham University Hospital NHS Trust                          | RNH | Yes (15) |     |            |
| 30 | Norfolk and Norwich University Hospitals NHS Foundation Trust | RM1 |          |     |            |



|    |                                                                                    |     |          |     |            |
|----|------------------------------------------------------------------------------------|-----|----------|-----|------------|
| 1  | North Bristol NHS Trust                                                            | RVJ |          |     |            |
| 2  | North Cumbria University Hospitals NHS Trust                                       | RNL |          |     |            |
| 3  | North Middlesex University Hospital NHS Trust                                      | RAP |          |     |            |
| 4  | North Tees and Hartlepool NHS Foundation Trust                                     | RVW |          |     |            |
| 5  | North West London Hospitals NHS Trust                                              | RV8 | Yes (16) |     |            |
| 6  | Northampton General Hospital NHS Trust                                             | RNS |          |     |            |
| 7  | Northern Devon Healthcare NHS Trust                                                | RBZ |          |     |            |
| 8  | Northern Lincolnshire and Goole NHS Foundation Trust                               | RJL |          |     |            |
| 9  | Northumbria Healthcare NHS Foundation Trust                                        | RTF |          |     |            |
| 10 | Nottingham University Hospitals NHS Trust                                          | RX1 |          |     |            |
| 11 | Oxford University Hospitals NHS Foundation Trust                                   | RTH | Yes (17) | Yes | 01/10/2015 |
| 12 | Papworth Hospital NHS Foundation Trust                                             | RGM |          |     |            |
| 13 | Pennine Acute Hospitals NHS Trust                                                  | RW6 |          |     |            |
| 14 | Peterborough and Stamford Hospitals NHS Foundation Trust                           | RGN |          |     |            |
| 15 | Plymouth Hospitals NHS Trust                                                       | RK9 |          |     |            |
| 16 | Poole Hospital NHS Foundation Trust                                                | RD3 |          |     |            |
| 17 | Portsmouth Hospitals NHS Trust                                                     | RHU |          |     |            |
| 18 | Queen Victoria Hospital NHS Foundation Trust                                       | RPC |          |     |            |
| 19 | Robert Jones and Agnes Hunt Orthopaedic and District Hospital NHS Foundation Trust | RL1 |          | Yes | 01/08/2011 |
| 20 | Royal Berkshire NHS Foundation Trust                                               | RHW |          |     |            |
| 21 | Royal Brompton and Harefield NHS Foundation Trust                                  | RT3 |          |     |            |
| 22 | Royal Cornwall Hospitals NHS Trust                                                 | REF |          |     |            |
| 23 | Royal Devon and Exeter NHS Foundation Trust                                        | RH8 |          |     |            |
| 24 | Royal Free London NHS Foundation Trust                                             | RAL | Yes (18) | Yes | 01/04/2012 |
| 25 | Royal Liverpool and Broadgreen University Hospitals NHS Trust                      | RQ6 |          |     |            |
| 26 | Royal National Hospital For Rheumatic Diseases NHS Foundation Trust                | RBB | Yes (19) |     |            |
| 27 | Royal National Orthopaedic Hospital NHS Trust                                      | RAN |          |     |            |
| 28 | Royal Surrey County NHS Foundation Trust                                           | RA2 |          |     |            |
| 29 | Royal United Hospitals Bath NHS Foundation Trust                                   | RD1 | Yes (20) | Yes | 01/11/2014 |
| 30 | Salford Royal NHS Foundation Trust                                                 | RM3 |          |     |            |

|    |                                                                       |     |          |     |            |
|----|-----------------------------------------------------------------------|-----|----------|-----|------------|
| 1  | Salisbury NHS Foundation Trust                                        | RNZ |          |     |            |
| 2  | Sandwell and West Birmingham Hospitals NHS Trust                      | RXK |          |     |            |
| 3  | Scarborough and North East Yorkshire Healthcare NHS Trust             | RCC | Yes (21) |     |            |
| 4  | Sheffield Children's NHS Foundation Trust                             | RCU |          |     |            |
| 5  | Sheffield Teaching Hospitals NHS Foundation Trust                     | RHQ |          |     |            |
| 6  | Sherwood Forest Hospitals NHS Foundation Trust                        | RK5 |          |     |            |
| 7  | Shrewsbury and Telford Hospital NHS Trust                             | RXW |          |     |            |
| 8  | South London NHS Healthcare Trust                                     | RYQ | Yes (22) |     |            |
| 9  | South Tees Hospitals NHS Foundation Trust                             | RTR |          |     |            |
| 10 | South Tyneside NHS Foundation Trust                                   | RE9 |          |     |            |
| 11 | South Warwickshire NHS Foundation Trust                               | RJC |          |     |            |
| 12 | Southend University Hospital NHS Foundation Trust                     | RAJ |          |     |            |
| 13 | Southport and Ormskirk Hospital NHS Trust                             | RVY |          |     |            |
| 14 | St George's University Hospitals NHS Foundation Trust                 | RJ7 |          | Yes | 01/02/2015 |
| 15 | St Helens and Knowsley Hospitals NHS Trust                            | RBN |          |     |            |
| 16 | Stockport NHS Foundation Trust                                        | RWJ |          |     |            |
| 17 | Surrey and Sussex Healthcare NHS Trust                                | RTP |          |     |            |
| 18 | Tameside Hospital NHS Foundation Trust                                | RMP |          |     |            |
| 19 | Taunton and Somerset NHS Foundation Trust                             | RBA |          |     |            |
| 20 | The Christie NHS Foundation Trust                                     | RBV |          |     |            |
| 21 | The Clatterbridge Cancer Centre NHS Foundation Trust                  | REN |          |     |            |
| 22 | The Dudley Group NHS Foundation Trust                                 | RNA |          |     |            |
| 23 | The Hillingdon Hospitals NHS Foundation Trust                         | RAS |          | Yes | 01/04/2011 |
| 24 | The Newcastle Upon Tyne Hospitals NHS Foundation Trust                | RTD |          |     |            |
| 25 | The Princess Alexandra Hospital NHS Trust                             | RQW |          |     |            |
| 26 | The Queen Elizabeth Hospital, King's Lynn. NHS Foundation Trust       | RCX |          | Yes | 01/02/2011 |
| 27 | The Rotherham NHS Foundation Trust                                    | RFR |          |     |            |
| 28 | The Royal Bournemouth and Christchurch Hospitals NHS Foundation Trust | RDZ |          |     |            |
| 29 | The Royal Marsden NHS Foundation Trust                                | RPY |          |     |            |
| 30 | The Royal Orthopaedic Hospital NHS Foundation Trust                   | RRJ |          |     |            |

|    |                                                              |     |          |     |            |
|----|--------------------------------------------------------------|-----|----------|-----|------------|
| 1  | The Royal Wolverhampton NHS Trust                            | RL4 | Yes (23) |     |            |
| 2  | The Walton Centre NHS Foundation Trust                       | RET |          |     |            |
| 3  | The Whittington Hospital NHS Trust                           | RKE |          |     |            |
| 4  | Torbay and South Devon NHS Foundation Trust                  | RA9 | Yes (24) |     |            |
| 5  | Trafford Healthcare NHS Trust                                | RM4 | Yes (25) |     |            |
| 6  | United Lincolnshire Hospitals NHS Trust                      | RWD |          |     |            |
| 7  | University College London Hospitals NHS Foundation Trust     | RRV |          |     |            |
| 8  | University Hospital Of South Manchester NHS Foundation Trust | RM2 |          |     |            |
| 9  | University Hospital Southampton NHS Foundation Trust         | RHM |          | Yes | 01/10/2011 |
| 10 | University Hospitals Birmingham NHS Foundation Trust         | RRK |          |     |            |
| 11 | University Hospitals Bristol NHS Foundation Trust            | RA7 |          |     |            |
| 12 | University Hospitals Coventry and Warwickshire NHS Trust     | RKB |          |     |            |
| 13 | University Hospitals Of Leicester NHS Trust                  | RWE |          |     |            |
| 14 | University Hospitals Of Morecambe Bay NHS Foundation Trust   | RTX |          | Yes | 01/10/2010 |
| 15 | University Hospitals of North Midlands NHS Trust             | RJE | Yes (26) |     |            |
| 16 | Walsall Healthcare NHS Trust                                 | RBK |          |     |            |
| 17 | Warrington and Halton Hospitals NHS Foundation Trust         | RWW |          |     |            |
| 18 | West Hertfordshire Hospitals NHS Trust                       | RWG |          |     |            |
| 19 | West Middlesex University Hospital NHS Trust                 | RFW | Yes (27) |     |            |
| 20 | West Suffolk NHS Foundation Trust                            | RGR |          | Yes | 01/12/2011 |
| 21 | Western Sussex Hospitals NHS Foundation Trust                | RYR |          | Yes | 01/07/2013 |
| 22 | Weston Area Health NHS Trust                                 | RA3 |          |     |            |
| 23 | Whipps Cross University Hospital NHS Trust                   | RGC | Yes (28) |     |            |
| 24 | Winchester and Eastleigh Healthcare Trust                    | RN1 | Yes (29) |     |            |
| 25 | Wirral University Teaching Hospital NHS Foundation Trust     | RBL |          |     |            |
| 26 | Worcestershire Acute Hospitals NHS Trust                     | RWP |          |     |            |
| 27 | Wrightington, Wigan and Leigh NHS Foundation Trust           | RRF |          |     |            |
| 28 | Wye Valley NHS Trust                                         | RLQ | Yes (30) |     |            |
| 29 | Yeovil District Hospital NHS Foundation Trust                | RA4 |          |     |            |
| 30 | York Teaching Hospital NHS Foundation Trust                  | RCB | Yes (31) |     |            |

1. Acquired by Royal Free London NHS FT in 2014
2. Merged with Newham University Hospital NHS Trust and Whipps Cross University Hospital NHS Trust to form Barts Health NHS Trust in 2012
3. Formed from the merger of Barts and the London NHS Trust, Whipps Cross University Hospital NHS Trust and Newham University Hospital NHS Trust in 2012
4. Acquired Trafford Healthcare NHS Trust in Apr 2012
5. Acquired West Middlesex University Hospital NHS Trust in Sep 2015
6. Merged with North West London Hospitals NHS Trust to form London North West Healthcare NHS Trust in 2014
7. Formed by merger of Heatherwood and Wexham Park Hospitals NHS FT and Frimley Park Hospital NHS FT on 1 October 2014
8. Formed by acquisition of Winchester and Eastleigh Healthcare Trust by Basingstoke and North Hampshire NHS FT in Jan 2012
9. Merged with Frimley Park Hospital NHS FT to form Frimley Health NHS FT on 1 October 2014
10. Created in Apr 2012 by a provider split from Isle of Wight NHS PCT (5QT)
11. Acquired Princess Royal University Hospital from South London NHS Healthcare Trust's dissolution in Oct 2013
12. Formed on 1 Oct 2013 by merger of merger of Lewisham Healthcare NHS Trust and Queen Elizabeth Hospital (previously part of South London NHS Healthcare Trust)
13. Formed by merger of Ealing Hospital NHS Trust and North West London Hospitals NHS Trust in 2014
14. Mid Staffordshire NHS FT which ran Stafford hospital dissolved In Nov 2014. Stafford hospital renamed to County Hospital and acquired by newly named University Hospitals of North Midlands NHS Trust
15. Merged with Barts and the London NHS Trust and Whipps Cross University Hospital NHS Trust to form Barts Health NHS Trust in 2012
16. Merged with Ealing Hospital NHS Trust to form London North West Healthcare NHS Trust in 2014
17. Formed from Oxford Radcliffe Hospitals NHS Trust by acquisition of Nuffield Orthopaedic Acute Centre NHS Trust in 2011
18. Acquired Barnet and Chase Farm Hospitals NHS Trust in 2014
19. Acquired by Royal United Hospital Bath NHS FT on 1 Feb 2015
20. Acquired Royal National Hospital For Rheumatic Diseases NHS FT on 1 Feb 2015
21. Acquired by York Teaching Hospital NHS Foundation Trust in Jul 2013
22. Dissolved in Oct 2013

- 1 23. Acquired Cannock Chase Hospital when Mid Staffordshire NHS FT dissolved In Nov 2014
- 2 24. Created on 1 Oct 2015 from South Devon Healthcare NHS Foundation Trust merging with Torbay and Southern Devon Health and Care NHS Trust
- 3 (community and social care services)
- 4
- 5 25. Acquired by Central Manchester University Hospitals NHS FT in Apr 2012
- 6
- 7 26. Formed from University Hospital Of North Staffordshire NHS Trust taking over Stafford Hospital (now named County Hospital) on 1 Nov 2014. Mid
- 8 Staffordshire NHS FT which ran Stafford hospital dissolved In Nov 2014
- 9
- 10 27. Acquired by Chelsea and Westminster Hospital NHS FT in Sep 2015
- 11
- 12 28. Merged with Newham University Hospital NHS Trust and Barts and the London NHS Trust to form Barts Health NHS Trust in 2012
- 13
- 14 29. Acquired by Basingstoke and North Hampshire NHS FT to form Hampshire Hospitals NHS FT in Jan 2012
- 15
- 16 30. Formed from Hereford Hospitals NHS Trust on 1 April 2011 following Herefordshire's health and adult social care providers joining to form an
- 17 integrated provider of acute, community and social care in England
- 18
- 19 31. Acquired Scarborough and North East Yorkshire Healthcare NHS Trust in Jul 2013
- 20
- 21
- 22
- 23
- 24
- 25
- 26
- 27
- 28
- 29
- 30
- 31
- 32
- 33
- 34
- 35
- 36
- 37
- 38
- 39
- 40
- 41
- 42
- 43
- 44
- 45
- 46

## SENSITIVITY ANALYSES AND ADDITIONAL TABLES

**Table A. Assessment of the impact of not adjusting for missing 2011 delayed transfer of care data.** Abbreviations: CI, confidence interval.

| Delayed transfers of care days per hospital bed | n   | Trust clusters | Coefficient | 95% CI         | p-value |
|-------------------------------------------------|-----|----------------|-------------|----------------|---------|
| Without adjustment for missing 2011 data        | 837 | 148            | -21.9       | -35.5 to -8.4  | 0.002   |
| With adjustment for missing 2011 data           | 837 | 148            | -25.1       | -39.1 to -11.0 | 0.001   |

**Table B. Association of operating margin with outcomes and process measures.** Adjusted regression analyses as per table 3 in the manuscript excluding Trusts that had changed in composition between 2011 and 2016. Abbreviations: A&E, Accident & Emergency; SHMI, Summary Hospital-level Mortality Indicator.

| Outcome                                         | n   | Trust clusters | Coefficient | 95% CI         | p-value |
|-------------------------------------------------|-----|----------------|-------------|----------------|---------|
| Readmission rate (%)                            | 344 | 119            | -0.01       | -0.03 to 0.01  | 0.403   |
| Inpatient satisfaction score (out of 10)        | 706 | 119            | 0.66        | -0.23 to 1.55  | 0.142   |
| A&E 4 hour breach rate (%)                      | 710 | 119            | -0.20       | -0.30 to -0.11 | <0.001  |
| Delayed transfers of care days per hospital bed | 711 | 119            | -29.5       | -44.1 to -14.8 | <0.001  |
| 2 week wait cancer target adherence (%)         | 710 | 119            | 0.05        | 0.00 to 0.10   | 0.042   |
| 62 day cancer treatment target adherence (%)    | 710 | 119            | 0.12        | 0.02 to 0.23   | 0.018   |

1  
2  
3  
4  
5  
6  
7  
8  
9  
10  
11  
12  
13  
14  
15  
16  
17  
18  
19  
20  
21  
22  
23  
24  
25  
26  
27  
28  
29  
30  
31  
32  
33  
34  
35  
36  
37  
38  
39  
40  
41  
42  
43  
44  
45  
46

**Table C. Association of operating margin with outcomes and process measures (summary model for 2011-13).** Operating margin and outcomes were averaged over the 3 years from 2011-13 to form the inputs to the summary model. Readmission rate is not included as data was not available for 2011-13. Abbreviations: A&E, Accident & Emergency; CI, confidence interval.

| <b>Agency spend as a proportion of turnover (%)</b> |             |             |             |             |             |             |
|-----------------------------------------------------|-------------|-------------|-------------|-------------|-------------|-------------|
|                                                     | <b>2011</b> | <b>2012</b> | <b>2013</b> | <b>2014</b> | <b>2015</b> | <b>2016</b> |
| <b>Worst 10%</b>                                    | 3.9         | 3.9         | 4.6         | 6.0         | 8.5         | 9.1         |
| <b>Middle 80%</b>                                   | 2.4         | 2.3         | 2.6         | 3.0         | 4.6         | 5.1         |
| <b>Best 10%</b>                                     | 2.7         | 2.9         | 3.4         | 3.8         | 4.0         | 4.5         |
|                                                     |             |             |             |             |             |             |
| <b>Ratio of worst to best</b>                       | 1.4         | 1.3         | 1.4         | 1.6         | 2.1         | 2.0         |
| <b>Difference (best and worst)</b>                  | 1.2         | 1.0         | 1.2         | 2.2         | 4.5         | 4.6         |

Peer review only

1 PUTATIVE INTERPLAY OF FACTORS AFFECTING TRUST FINANCE AND PERFORMANCE

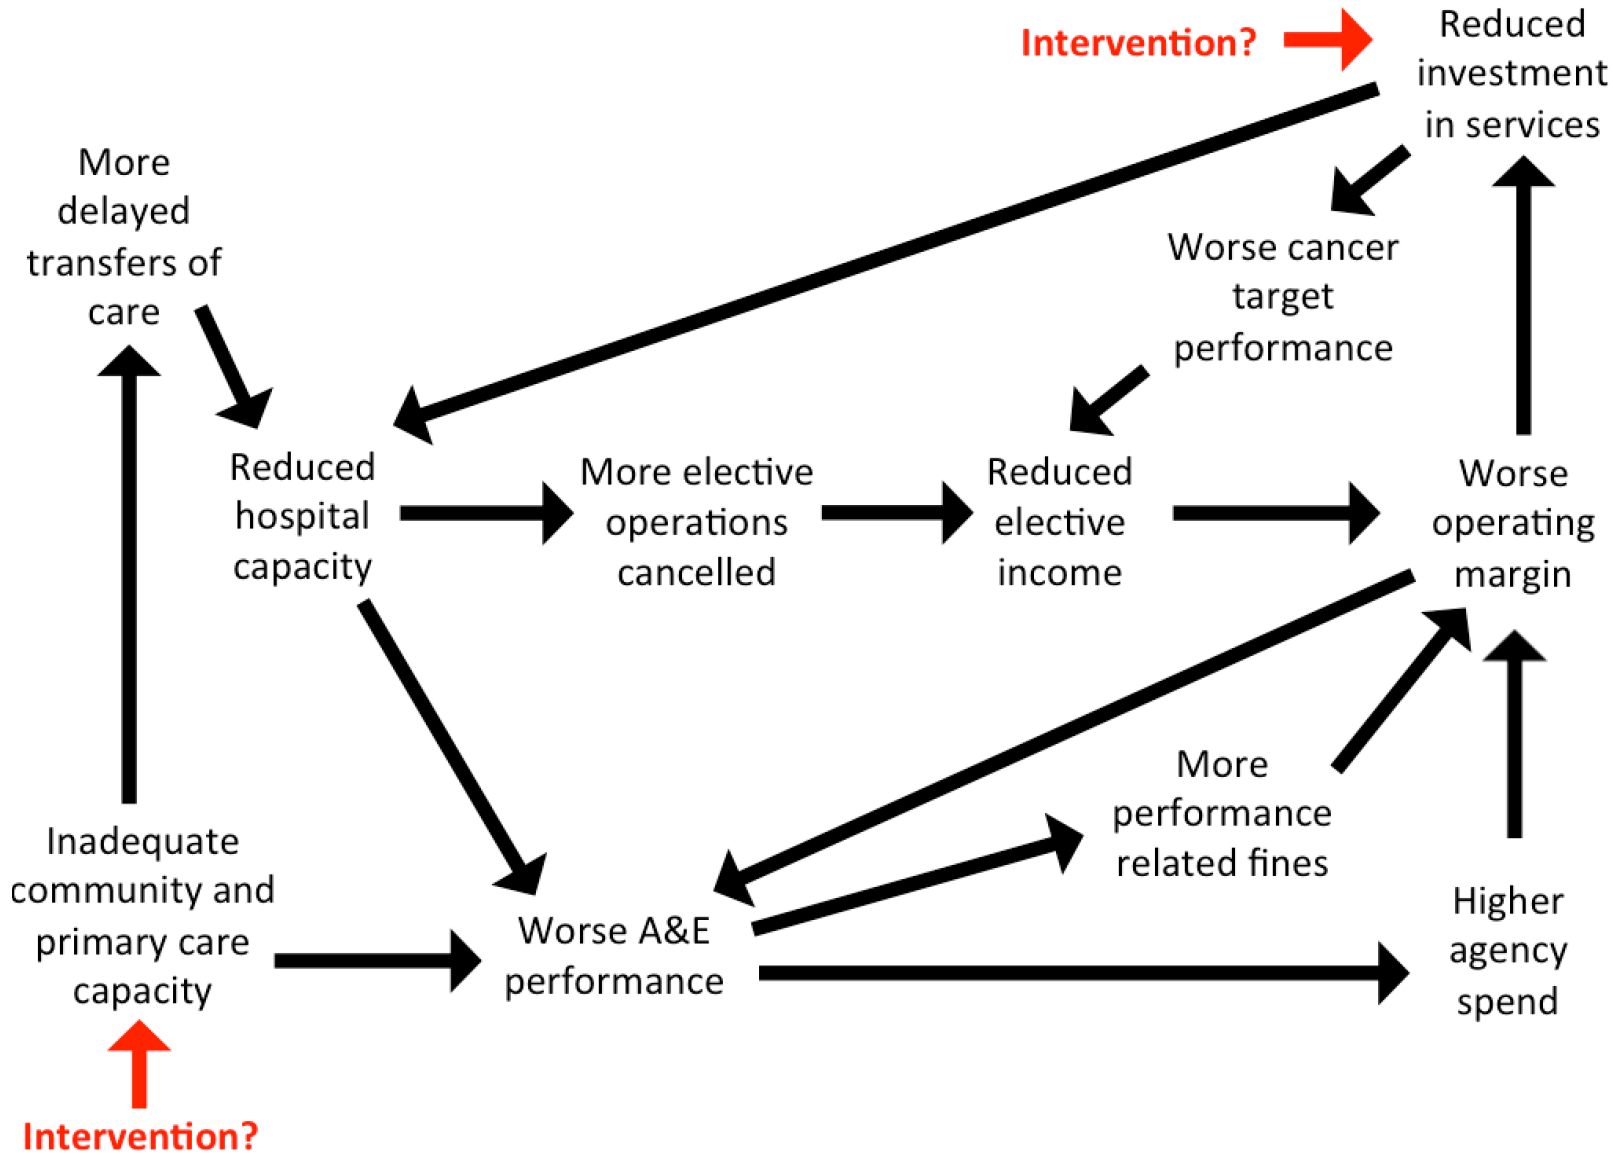



STROBE Statement—Checklist of items that should be included in reports of *cohort studies*

|                              | Item No | Recommendation                                                                                                                                                                                           |
|------------------------------|---------|----------------------------------------------------------------------------------------------------------------------------------------------------------------------------------------------------------|
| <b>Title and abstract</b>    | 1       | (a) Indicate the study's design with a commonly used term in the title or the abstract<br><b>PAGE 1</b>                                                                                                  |
|                              |         | (b) Provide in the abstract an informative and balanced summary of what was done and what was found<br><b>PAGE 2</b>                                                                                     |
| <b>Introduction</b>          |         |                                                                                                                                                                                                          |
| Background/rationale         | 2       | Explain the scientific background and rationale for the investigation being reported<br><b>PAGE 4</b>                                                                                                    |
| Objectives                   | 3       | State specific objectives, including any pre-specified hypotheses<br><b>PAGE 4</b>                                                                                                                       |
| <b>Methods</b>               |         |                                                                                                                                                                                                          |
| Study design                 | 4       | Present key elements of study design early in the paper<br><b>PAGES 5-7</b>                                                                                                                              |
| Setting                      | 5       | Describe the setting, locations, and relevant dates, including periods of recruitment, exposure, follow-up, and data collection<br><b>PAGES 5-7 (IN SO FAR AS APPLICABLE TO THIS STUDY)</b>              |
| Participants                 | 6       | (a) Give the eligibility criteria, and the sources and methods of selection of participants. Describe methods of follow-up<br><b>PAGE 5 (NO PARTICIPANTS, DESCRIBED FOR CENTRES)</b>                     |
|                              |         | (b) For matched studies, give matching criteria and number of exposed and unexposed<br><b>NOT APPLICABLE</b>                                                                                             |
| Variables                    | 7       | Clearly define all outcomes, exposures, predictors, potential confounders, and effect modifiers. Give diagnostic criteria, if applicable<br><b>PAGES 5-7</b>                                             |
| Data sources/<br>measurement | 8*      | For each variable of interest, give sources of data and details of methods of assessment (measurement). Describe comparability of assessment methods if there is more than one group<br><b>PAGES 5-7</b> |
| Bias                         | 9       | Describe any efforts to address potential sources of bias                                                                                                                                                |
| Study size                   | 10      | Explain how the study size was arrived at<br><b>PAGE 5</b>                                                                                                                                               |
| Quantitative variables       | 11      | Explain how quantitative variables were handled in the analyses. If applicable, describe which groupings were chosen and why                                                                             |
| Statistical methods          | 12      | (a) Describe all statistical methods, including those used to control for confounding<br><b>PAGES 7-8</b>                                                                                                |
|                              |         | (b) Describe any methods used to examine subgroups and interactions<br><b>PAGE 7</b>                                                                                                                     |
|                              |         | (c) Explain how missing data were addressed<br><b>PAGES 6-7</b>                                                                                                                                          |
|                              |         | (d) If applicable, explain how loss to follow-up was addressed<br><b>NOT APPLICABLE</b>                                                                                                                  |
|                              |         | (e) Describe any sensitivity analyses<br><b>PAGE 8</b>                                                                                                                                                   |

1  
2  
3  
4  
5  
6  
7  
8  
9  
10  
11  
12  
13  
14  
15  
16  
17  
18  
19  
20  
21  
22  
23  
24  
25  
26  
27  
28  
29  
30  
31  
32  
33  
34  
35  
36  
37  
38  
39  
40  
41  
42  
43  
44  
45  
46  
47  
48  
49  
50  
51  
52  
53  
54  
55  
56  
57  
58  
59  
60

| <b>Results</b>           |     |                                                                                                                                                                                                                                                                                                                                                                                                                                                                                                                                                   |
|--------------------------|-----|---------------------------------------------------------------------------------------------------------------------------------------------------------------------------------------------------------------------------------------------------------------------------------------------------------------------------------------------------------------------------------------------------------------------------------------------------------------------------------------------------------------------------------------------------|
| Participants             | 13* | <p>(a) Report numbers of individuals at each stage of study—eg numbers potentially eligible, examined for eligibility, confirmed eligible, included in the study, completing follow-up, and analysed</p> <p><b>NOT APPLICABLE</b></p> <p>(b) Give reasons for non-participation at each stage</p> <p><b>NOT APPLICABLE BUT DETAILS GIVEN IN ONLINE APPENDIX REGARDING CHANGE IN COMPOSITION OF TRUSTS</b></p> <p>(c) Consider use of a flow diagram</p> <p><b>NOT APPLICABLE</b></p>                                                              |
| Descriptive data         | 14* | <p>(a) Give characteristics of study participants (eg demographic, clinical, social) and information on exposures and potential confounders</p> <p><b>NOT APPLICABLE BUT DETAILS FOR TRUSTS GIVEN ON PAGES 9 &amp; 24</b></p> <p>(b) Indicate number of participants with missing data for each variable of interest</p> <p><b>NOT APPLICABLE BUT DETAILS FOR TRUSTS GIVEN ON PAGE 5 IN METHODS SECTION</b></p> <p>(c) Summarise follow-up time (eg, average and total amount)</p> <p><b>NOT APPLICABLE AS FOLLOW-UP TIME IS STUDY-PERIOD</b></p> |
| Outcome data             | 15* | <p>Report numbers of outcome events or summary measures over time</p> <p><b>NOT APPLICABLE IN THE FORMAT OF NUMBER OF OUTCOME EVENTS</b></p>                                                                                                                                                                                                                                                                                                                                                                                                      |
| Main results             | 16  | <p>(a) Give unadjusted estimates and, if applicable, confounder-adjusted estimates and their precision (eg, 95% confidence interval). Make clear which confounders were adjusted for and why they were included</p> <p><b>PAGES 9-11</b></p> <p>(b) Report category boundaries when continuous variables were categorized</p> <p><b>PAGES 9-11</b></p> <p>(c) If relevant, consider translating estimates of relative risk into absolute risk for a meaningful time period</p> <p><b>NOT APPLICABLE</b></p>                                       |
| Other analyses           | 17  | <p>Report other analyses done—eg analyses of subgroups and interactions, and sensitivity analyses</p> <p><b>PAGE 11 AND ONLINE APPENDIX</b></p>                                                                                                                                                                                                                                                                                                                                                                                                   |
| <b>Discussion</b>        |     |                                                                                                                                                                                                                                                                                                                                                                                                                                                                                                                                                   |
| Key results              | 18  | <p>Summarise key results with reference to study objectives</p> <p><b>PAGE 11</b></p>                                                                                                                                                                                                                                                                                                                                                                                                                                                             |
| Limitations              | 19  | <p>Discuss limitations of the study, taking into account sources of potential bias or imprecision. Discuss both direction and magnitude of any potential bias</p> <p><b>PAGES 13-14</b></p>                                                                                                                                                                                                                                                                                                                                                       |
| Interpretation           | 20  | <p>Give a cautious overall interpretation of results considering objectives, limitations, multiplicity of analyses, results from similar studies, and other relevant evidence</p> <p><b>PAGES 14-16</b></p>                                                                                                                                                                                                                                                                                                                                       |
| Generalisability         | 21  | <p>Discuss the generalisability (external validity) of the study results</p> <p><b>PAGES 14-16</b></p>                                                                                                                                                                                                                                                                                                                                                                                                                                            |
| <b>Other information</b> |     |                                                                                                                                                                                                                                                                                                                                                                                                                                                                                                                                                   |
| Funding                  | 22  | <p>Give the source of funding and the role of the funders for the present study and, if applicable, for the original study on which the present article is based</p>                                                                                                                                                                                                                                                                                                                                                                              |

\*Give information separately for exposed and unexposed groups.

**Note:** An Explanation and Elaboration article discusses each checklist item and gives methodological background and published examples of transparent reporting. The STROBE checklist is best used in conjunction with this article (freely available on the Web sites of PLoS Medicine at <http://www.plosmedicine.org/>, Annals of Internal Medicine at <http://www.annals.org/>, and Epidemiology at <http://www.epidem.com/>). Information on the STROBE Initiative is available at <http://www.strobe-statement.org>.

For peer review only

# BMJ Open

## Financial Performance of English NHS Trusts and Variation in Clinical Outcomes: A Longitudinal Observational Study

|                                 |                                                                                                                                                                                                                                                                                                                                                                                                                   |
|---------------------------------|-------------------------------------------------------------------------------------------------------------------------------------------------------------------------------------------------------------------------------------------------------------------------------------------------------------------------------------------------------------------------------------------------------------------|
| Journal:                        | <i>BMJ Open</i>                                                                                                                                                                                                                                                                                                                                                                                                   |
| Manuscript ID                   | bmjopen-2018-021854.R1                                                                                                                                                                                                                                                                                                                                                                                            |
| Article Type:                   | Research                                                                                                                                                                                                                                                                                                                                                                                                          |
| Date Submitted by the Author:   | 07-May-2018                                                                                                                                                                                                                                                                                                                                                                                                       |
| Complete List of Authors:       | Nagendran, Myura; Imperial College London, Division of Anaesthetics, Pain Medicine and Intensive Care<br>Kiew, Grace; North West Anglia NHS Foundation Trust<br>Raine, Rosalind; University College London, Department of Applied Health Care<br>Atun, Rifat; Harvard University, Harvard School of Public Health<br>Maruthappu, Mahiben; University College London, Department of Epidemiology and Public Health |
| <b>Primary Subject Heading</b>: | Health services research                                                                                                                                                                                                                                                                                                                                                                                          |
| Secondary Subject Heading:      | Health economics, Health policy                                                                                                                                                                                                                                                                                                                                                                                   |
| Keywords:                       | hospital, finance, outcomes, process measures                                                                                                                                                                                                                                                                                                                                                                     |
|                                 |                                                                                                                                                                                                                                                                                                                                                                                                                   |

SCHOLARONE™  
Manuscripts

Peer Review Only

# Financial Performance of English NHS Trusts and Variation in Clinical Outcomes: A Longitudinal Observational Study

Myura Nagendran, MRCP<sup>1</sup>

Grace Kiew, MB BChir<sup>2</sup>

Rosalind Raine, PhD<sup>3</sup>

Rifat Atun, FRCP<sup>4</sup>

Mahiben Maruthappu, BM BCh<sup>5</sup>

1. Honorary Clinical Research Fellow, Division of Anaesthetics, Pain Medicine and Intensive Care, Imperial College London, UK
2. Foundation Doctor, North West Anglia NHS Foundation Trust, Peterborough, UK
3. Professor, Department of Applied Health Care, University College London, UK
4. Professor, Harvard T.H. Chan School of Public Health, Harvard University, Boston, MA, USA
5. Public Health Registrar, Department of Epidemiology and Public Health, University College London, UK

**Manuscript version:** 3·6

**Date of version:** 7 May 2018

**Corresponding author:** Dr. Mahiben Maruthappu  
Academic Clinical Fellow in Public Health  
Department of Epidemiology and Public Health  
University College London, UK

**E-mail:** [mahiben.maruthappu@nhs.net](mailto:mahiben.maruthappu@nhs.net)

**Phone:** + 44 7535 184 912

## ABSTRACT

### Objectives

To examine the association between financial performance as measured by operating margin (surplus/deficit as a proportion of turnover) and clinical outcomes in English NHS trusts.

### Setting

Longitudinal, observational study in 149 acute NHS trusts in England between the financial years 2011 and 2016.

### Participants

Our analysis focused on the outcomes at individual NHS Trust-level (composed of one or more acute hospitals).

### Primary and secondary outcomes

Outcome measures included readmissions, inpatient satisfaction score and the following process measures: emergency department (A&E) waiting time targets, cancer referral and treatment targets, and delayed transfers of care.

### Results

There was a progressive increase in the proportion of trusts in financial deficit: 22% in 2011, 27% in 2012, 28% in 2013, 51% in 2014, 68% in 2015 and 91% in 2016. In linear regression analyses, there was no significant association between operating margin and clinical outcomes (readmission rate or inpatient satisfaction score). There was, however, a significant association between operating margin and process measures (delayed transfers of care, A&E breaches and cancer waiting time targets). Between the best and worst financially performing Trusts, there was an approximately 2-fold increase in A&E breaches and delayed transfers of care overall although this variation decreased over the six years. Despite significant differences between the best and worst performing trusts on cancer targets, the magnitude of difference was much smaller (1·16 and 1·15-fold), although the variation slowly rose during the six years.

### Conclusions

Operating margins in English NHS trusts progressively worsened during 2011-16, and this change was associated with poorer performance on several process measures but not with hospital readmissions or inpatient satisfaction. Significant variation exists between the best and worst financially performing Trusts. Further research is needed to examine the causal nature of relationships between financial performance, process measures and outcomes.

## STRENGTHS AND LIMITATIONS

- To our knowledge, one of the first empirical exploratory analyses of the relationship between funding and outcomes in the English NHS
- Operating margin may not be the ideal measure of an organisation's financial position
- The proportion of activity at each Trust which is elective, acute or specialised was not taken into account nor was the percentage of activity subject to a national tariff
- There may be additional unmeasured confounders that have impacted the results
- This observational study is limited to demonstrating associations rather than causal links

## INTRODUCTION

The combination of higher demand due to ageing, growing populations, with more chronic illness and disability, in addition to rising treatment and technology costs, is driving increased health spending in high-income countries.<sup>1</sup> The National Health Service (NHS) in England is introducing policies to address these demands, attempting to contain costs while improving health outcomes. The NHS Five Year Forward View, published in October 2014, set out a strategic vision for sustaining a high-quality, comprehensive health system in England.<sup>2</sup> Specifically, it identified a £22 billion funding gap by 2020/21, based on the current funding trajectory of the NHS, to be met by ambitious efficiency savings of 2-3% annually (given a long-term track-record of 1% each year).

The call for increased efficiency comes in an austere climate, in which individual NHS Trusts are progressively challenged to achieve financial control,<sup>3,4</sup> while responding to high demand, especially in winter months, reported widely in the British media.<sup>5</sup> NHS Improvement, the body responsible for overseeing Trust performance, reported an overall third quarter deficit of £886 million for the 2016-17 financial year, £300 million higher than the planned target.<sup>6</sup> Higher demand for services, with rising emergency attendances and admissions, and delayed transfers of care (DTOCs), have been cited as key reasons for increasing deficit.<sup>7</sup> While control of Trust financial deficits is important for sustainability of the NHS, there are concerns on the adverse impact of worsening financial performance on clinical outcomes and processes,<sup>8</sup> but few studies which have explored this relationship.

We investigated the relationship between operating margin (surplus/deficit as a proportion of turnover) at English NHS Trusts during 2011-16, with outcomes and process measures. We selected performance measures that are commonly used for benchmarking performance of NHS Trusts and that could plausibly be related to quality, namely, hospital readmissions, inpatient satisfaction scores, emergency department waiting time targets, cancer referral and treatment targets, and delayed transfers of care.<sup>9</sup> Lastly, we investigated the variation in outcome and process measures between the financially best and worst performing Trusts, both overall and over time.



## METHODS

### Data sources and extraction

NHS Hospitals in England are categorised into financially and operationally distinct legal entities known as Trusts, which deliver services on behalf of the NHS. Trusts may be located at multiple sites and can be responsible for one or more hospitals. Well-performing Trusts are able to gain Foundation status, which allows a degree of financial and operational autonomy from the Department of Health. Data was sought for acute NHS Trusts in the 6-year period encompassing the financial years from April 2010 to March 2016.

We obtained financial data for Trusts from the gov.uk open data portal.<sup>10</sup> Where information was lacking for specific Trusts, we sought the original data from the published accounts available on individual Trust websites or from NHS 'The Quarter' reports.<sup>11</sup>

Data on four financial metrics were extracted and examined: first, the retained surplus/deficit for the financial year; second, the turnover for the Trust (calculated as "Revenue from patient care activities" and "Other operating revenue"); third, trust spend on agency staff, and fourth, spend on consultancy. The precise table IDs and sub-codes for extraction are detailed in the online Supplementary Appendix. Only the first two metrics are measures of financial performance. The second two reflect Trust spending choices and we included these as exploratory variables given the public and media interest in rising agency and consultancy spend.

Bed availability for the quarter preceding the end of each financial year was obtained from publicly available NHS England data<sup>12</sup> with occupancy rate calculated as the percentage of beds (as a proportion of total available) occupied on average during that quarter. Teaching status of the trusts was defined dichotomously on the basis of membership of The Association of UK University Hospitals.<sup>13</sup> For each NHS Trust, the postcode of the Trust was extracted and used as a proxy for location to calculate the region of the country in which the trust hospitals were located.

1 This postcode data were matched to the 2015 Indices of Multiple Deprivation (IMD) score.<sup>14</sup> The Office  
2 for National Statistics uses UK census data to generate the IMD score which encompasses census  
3 information from the following domains: income, employment, crime, living environment, health  
4 deprivation and disability, education and skills/training, barriers to housing and services.  
5  
6  
7  
8  
9

10 Using publicly available NHS England datasets, we obtained data on hospital activity in the form of  
11 number of annual admissions per Trust and annual outpatient attendances.<sup>15</sup> Data on last-minute  
12 elective operation cancellations (for non-clinical reasons) and the number of such patients not being  
13 treated within 28 days of such a cancellation were also extracted from publicly available NHS England  
14 datasets.<sup>15</sup>  
15  
16  
17  
18  
19

### 20 **Outcome measures**

21 The outcomes we measured consisted of two clinical measures and three process measures that are  
22 commonly used for benchmarking NHS Trusts and have plausible mechanisms for a relation to quality.  
23 We openly acknowledge that there are several other outcomes and process measures which may also  
24 relate to quality and could have been chosen. Our selection was based on a combination of logistical  
25 constraints (i.e. what data was publicly available) and an effort to include measures which are commonly  
26 used for benchmarking trusts and thereby also reported in the mainstream media.<sup>9</sup>  
27  
28  
29  
30  
31  
32  
33  
34  
35  
36  
37

38 The clinical measures were (i) the proportion of discharges readmitted as an emergency within 7 days of  
39 discharge and (ii) annual overall patient satisfaction for each trust using data from the National Adult  
40 Inpatient Survey compiled by the Care Quality Commission.<sup>16</sup> Data on readmissions was only available  
41 for the years 2014-16. The three process measures were: (i) Accident and Emergency (A&E) 4-hour  
42 waiting time breaches (ii) delayed transfers of care from an acute Trust, and (iii) cancer waiting time  
43 targets.  
44  
45  
46  
47  
48  
49  
50

51 The first process measure, Accident and Emergency (A&E) 4-hour waiting time breaches, was defined  
52 as the percentage of patient attendances in type 1 departments (major A&E) who waited greater than  
53 four hours from arrival to admission, transfer or discharge.  
54  
55  
56  
57  
58  
59

1  
2  
3 The second process measure, a delayed transfer of care from an acute Trust, was said to occur when a  
4 patient was ready to depart from acute care but was still occupying a bed. These data were extracted as  
5 'total number of bed days attributed to delayed transfers of care' and standardised to number of beds  
6 available in the Trust. Delayed transfer of care data were only available for the latter eight months of the  
7 2011 financial year. To ensure comparability with other years, a 1.5x multiplier was applied for each trust  
8 in this financial year (see online Supplementary Appendix for further details). No other missing data in  
9 the study was imputed.  
10  
11  
12  
13  
14  
15  
16  
17

18 For the third process measure, cancer waiting time targets, we assessed two specific targets (a) the  
19 proportion of patients who received a first consultant appointment within two weeks of urgent referral for  
20 suspected cancer by their General Practitioner (GP) and (b) the proportion of patients who commenced  
21 a first treatment for cancer within 62 days of being urgently referred by their GP.  
22  
23  
24  
25  
26  
27

### 28 **Unit of analysis**

29  
30 Our analysis focused on the outcomes at individual NHS Trust-level (composed of one or more acute  
31 hospitals).  
32  
33  
34  
35

### 36 **Statistical analysis**

37  
38 Our financial metric of interest was the annual Trust operating margin. Similarly to prior literature,<sup>17-19</sup> we  
39 defined operating margin as the retained surplus (or deficit) for the Trust in a financial year divided by the  
40 turnover (turnover being calculated as "Revenue from patient care activities" and "Other operating  
41 revenue"). This value was winsorised to set all outliers beyond the 2.5<sup>th</sup> and 97.5<sup>th</sup> percentiles to the  
42 values at these percentiles. We first calculated summary statistics of the operating surplus/deficit and  
43 metrics of trust characteristics, breaking the sample into 4 groups of deciles by Trust margin.  
44  
45  
46  
47  
48  
49  
50  
51

52 As a second step, we compared the variation in process and outcome measures between the financially  
53 best and worst performing trusts as categorised by operating margin decile (highest versus lowest).  
54  
55

56 Third, we performed multiple linear regression with our outcomes as the dependent variable and the  
57  
58  
59  
60

1 following independent variables: operating margin, number of beds available and year. Each Trust in  
2 each year was treated as a separate observation with standard errors clustered by Trust to account for  
3 the non-independence of Trust-level data.  
4  
5  
6  
7

8 Fourth, we compared outcomes and process measures between 'struggling' and 'non-struggling' Trusts.  
9 For this purpose, a struggling Trust was defined as either: (i) in financial or quality special measures as  
10 of December 2016 or (ii) a Foundation Trust subject to enforcement actions by Monitor as of September  
11 2016. Fifth, we investigated the relationships between delayed transfers of care, cancelled elective  
12 operations, agency spend, A&E breaches and operating margin by assessing correlation between these  
13 variables over an early period (2011-12) and a late period (2015-16).  
14  
15  
16  
17  
18  
19  
20  
21

22 We performed sensitivity analyses to assess the impact of (i) adjustment for missing 2011 delayed  
23 transfer of care data and (ii) inclusion of Trusts that had changed in composition during the study period.  
24  
25  
26  
27

28 All reported  $p$ -values are two sided with the statistical significance threshold set to a  $p$ -value of less than  
29 0.05. Given the hypothesis generating nature of this study, no corrections were made for multiple  
30 comparisons. Approximately 1 in every 20 comparisons could be expected to achieve statistical  
31 significance by chance alone. All analyses were performed using STATA statistical software version 12.1  
32 (College Station, TX). This study had no external funding source.  
33  
34  
35  
36  
37  
38  
39

#### 40 **Patient involvement**

41 Patients were not involved in any aspect of the study design, conduct or in the development of the  
42 research question or outcome measures. This study was a retrospective longitudinal observational study  
43 of publicly available Trust-level data and therefore there was no active patient recruitment for data  
44 collection or requirement for ethical approval.  
45  
46  
47  
48  
49  
50  
51  
52  
53  
54  
55  
56  
57  
58  
59  
60

## RESULTS

Over the 6-year period of study, encompassing the financial years from April 2010 to March 2016, there were changes in the composition to 31 of 149 Trusts. These are detailed in the online Supplementary Appendix and took the form of creation of a new Trust, dissolution of an existing Trust, acquisitions of a hospital or entire Trust to another Trust and mergers between Trusts. 13 Trusts (9%) transitioned to Foundation Status during the 6-year study period. Of the remaining 136 Trusts, 63 (42%) were non Foundation Trusts and 73 (49%) were Foundation Trusts.

There was a progressive increase in the proportion of Trusts in deficit over the 6-year study period: 22% in 2011, 27% in 2012, 28% in 2013, 51% in 2014, 68% in 2015 and 91% in 2016. The distribution of average operating surplus/deficit over the study period is displayed in Figure 1. Operating surplus/deficit varied widely across Trusts ranging from -£250 million to £181 million over the six years. Median operating surplus/deficit over the study period was -£3.8 million (IQR -£8.7 million to -£0.7 million, range -£63.1 million to £32.6 million). Median operating margin over the study period was -1.1% (IQR -2.7% to -0.2%, range -42.5% to 4.6%). Median operating margin was higher in teaching Trusts compared to non-Teaching Trusts (-0.5% versus -1.4%,  $p=0.002$ ) and lowest in the Midlands compared to other regions (-2.3% in the Midlands, -1.2% in London, -0.8% in the South, -1.0% in the North;  $p=0.028$ ).

During the 6-year study period, there was a nationwide decline in overnight general and acute beds from 110,568 to 103,422 (6.5% reduction) with a concomitant increase in day only beds from 11,572 to 12,207 (5.5% increase).

Trust metrics are shown in Table 1 stratified by decile of operating margin. Between the best and worst financially performing Trusts, there was an approximately 1.75-fold and 2-fold increase in agency and consultancy spend respectively as a proportion of turnover. The best financially performing Trusts also had a 1.5-fold higher annual number of outpatient attendances. In contrast, the annual number of admissions, bed occupancy rates and local deprivation scores were broadly similar between the best and worst performing Trusts. The proportion of Trusts with teaching status increased throughout deciles

1 of operating margin. Trends in the variation of operating margin over time with clinical outcomes and  
2 process measures are displayed in figures 2 and 3 respectively.  
3  
4  
5

6 Clinical outcomes and process measures, stratified by decile of operating margin, are shown in table 2.  
7  
8 Between the best and worst financially performing Trusts, there was an approximately 2-fold increase in  
9 A&E breach rates and delayed transfers of care. In contrast, despite significant differences between the  
10 best and worst performing trusts on cancer targets, the magnitude of difference was much smaller (both  
11 approximately 1·15-fold).  
12  
13  
14  
15

16  
17  
18 Trends in the variation between the best and worst financially performing Trusts over time for both  
19 clinical outcomes and process measures are shown in table 3. There was no appreciable variation in  
20 readmission rate or inpatient satisfaction score with the latter increasing over time at a slightly faster rate  
21 in the worst financially performing Trusts.  
22  
23  
24  
25

26  
27  
28 Performance on process measures in both the best and worst financially performing Trusts deteriorated  
29 over time (table 3). However, variation between the best and worst groups narrowed for A&E breaches,  
30 returned to baseline for delayed transfers of care after an initial rise, and rose slowly for both cancer  
31 target breaches. The variation in agency spend as a proportion of turnover between the best and worst  
32 financially performing trusts increased substantially between 2011 (best 2·7% and worst 3·9%,  
33 difference 1·2%) and 2016 (best 4·5% and worst 9·1%, difference 4·6%) (see online Supplementary  
34 Appendix for further details).  
35  
36  
37  
38  
39  
40  
41

42  
43  
44 In our linear regression analyses, there was no significant association between operating margin and  
45 clinical outcomes (readmission rate or inpatient satisfaction score; table 4). There was, however, a  
46 significant association between operating margin and process measures (delayed transfers of care, A&E  
47 breaches and cancer waiting time targets; table 4). Trusts defined as struggling (i.e. in special measures  
48 or subject to enforcement action) were associated with worse performance on all process measures but  
49 not with readmission rate or inpatient satisfaction scores (table 5).  
50  
51  
52  
53  
54  
55  
56  
57  
58  
59  
60

1 The associations between delayed transfers of care, elective surgery cancellations, agency spend, A&E  
2 breaches and operating margins are displayed in a correlation matrix for the early years (2011 and 2012;  
3 figure 4) and the later years (2015 and 2016; figure 5) of the six year study period (same scale applied to  
4 figure 4) and the later years (2015 and 2016; figure 5) of the six year study period (same scale applied to  
5 both figures 4 and 5). There was weak positive correlation between all factors except operating margin  
6 for which there was weak negative correlation with the other measures. These associations were  
7 maintained in the later years though with a greater spread among trusts.  
8  
9  
10  
11  
12  
13

14 Sensitivity analyses are reported in the online Supplementary Appendix. There was no change to the  
15 results with and without adjustment for missing 2011 delayed transfer of care data. There was no change  
16 to the results when excluding Trusts that had changed in composition over the study period.  
17  
18  
19  
20  
21  
22  
23  
24  
25  
26  
27  
28  
29  
30  
31  
32  
33  
34  
35  
36  
37  
38  
39  
40  
41  
42  
43  
44  
45  
46  
47  
48  
49  
50  
51  
52  
53  
54  
55  
56  
57  
58  
59  
60

## DISCUSSION

### Principal findings

Our study has a number of important findings. First, in the period 2011-16, there was a substantial increase in the proportion of NHS Trusts with negative operating margins. Second, the overall variation between the best and worst financially performing Trusts was considerably larger for A&E breach rates and delayed transfers of care than for cancer targets. Third, the variation over time between the best and worst financially performing trusts was static for clinical outcomes and mixed for process measures (decreased over the six years for A&E breaches, was static for delayed transfers of care while increasing slightly for cancer targets). Fourth, there was a significant association between worsened operating margin and deteriorating process measures (four-hour A&E targets, cancer waiting time targets and delayed transfers of care), but not between operating margin and either readmission rates or inpatient satisfaction scores.

### Comparison with other studies

The extant literature on the association between financial performance and outcomes comes primarily from the United States (US) and is mixed in pronouncement. Volpp and colleagues assessed the impact of a budget act reducing Medicare reimbursements on processes of care for acute myocardial infarction (MI).<sup>20</sup> They found that while the budget act added moderate financial strain to organisations, there was no appreciable worsening of care with respect to MI processes of care or mortality in 236,506 patients from 208 hospitals. An analysis by Bazzoli and colleagues in 2008 concluded that while there may be an association between some measures of financial performance and adverse events, it was much weaker than previously reported by Encinosa and Bernard who found a concerning association between frequency of patient safety alerts and operating margin.<sup>17,18</sup> Further, a study by Ly and colleagues in over 3,000 US hospitals found that low hospital margins were associated with worse processes of care and higher readmissions, although not with higher mortality.<sup>21</sup>

Placing our findings in the context of earlier studies requires extreme caution given the differences between the US and UK health systems. Specifically, Ly et al. excluded public hospitals (which comprise



1 the vast majority of English hospitals) from their analysis. However, these prior studies do highlight the  
2 difficulty in disentangling the relationship between financial performance and outcomes. Meanwhile, a  
3 large European cohort study revealed that attempts to save money by cutting nurse to patient ratios may  
4 adversely affect patient outcomes.<sup>22</sup> An increase in a nurses' workload by one patient increased the  
5 likelihood of a 30-day inpatient death by 7% (odds ratio 1·07, 95% CI 1·03 to 1·11).<sup>22</sup>  
6  
7  
8  
9

### 10 11 12 **Study limitations**

13 Our findings must be borne in light of several study limitations. First, while we had access to a  
14 considerable volume of data, the granularity of data was limited. For example, our unit of analysis was at  
15 the Trust level, giving a sample size of approximately 149 compared to equivalent US studies that have  
16 analysed over 3000 hospitals.<sup>21</sup> Lack of 'high-frequency' data also prevented us performing interrupted  
17 time-series and time-lag analyses.  
18  
19  
20  
21  
22  
23

24  
25  
26 Second, it may be that operating margin is not the ideal measure of an organisation's financial position.  
27 A Trust's deficit may be exaggerated if it realises that a deficit is unavoidable and careful accounting  
28 allows for a larger than necessary deficit in one year to ensure a small surplus in the following year (as  
29 opposed to two years of deficit); potential gamification. Organisations including NHS Improvement and  
30 the Department of Health typically use breakeven performance figures instead of operating  
31 surplus/deficits. We chose not to use such figures as the data were not easily available at Trust level for  
32 much of the period under investigation.  
33  
34  
35  
36  
37  
38  
39  
40

41  
42 Third, we utilised only a small selection of existing clinical outcomes and process. This decision was  
43 driven by two factors. Logistically, there is limited public access to many clinical outcomes. While there is  
44 access to many process measures, we opted for a small selection that is commonly used for  
45 benchmarking trusts (i.e. often quoted in media reports and receive major public scrutiny) so as to avoid  
46 the issues of multiple comparisons. It is entirely possible that other process measures may well display  
47 differing relationships with respect to operating margins.  
48  
49  
50  
51  
52  
53  
54  
55  
56  
57  
58  
59  
60

1 Fourth, we did not take into account the proportion of activity at each Trust which is elective, acute or  
2 specialised nor did we assess the percentage of activity subject to a national tariff. Work from the Health  
3 Foundation in 2016 suggests a link between financial performance and the proportion of Trust income  
4 arising from activities subject to the national tariff.<sup>23</sup> Reimbursement prices for specialist activity tend to  
5 be higher than average treatment costs. Furthermore, best practice tariffs tend to reward more efficient  
6 treatment delivery such as an increased proportion of day cases. Although there is likely to be correlation  
7 between teaching hospital status (which we did assess) and the share of activity subject to a specialised  
8 services tariff, this is nonetheless a crude proxy.  
9

10  
11  
12  
13  
14  
15  
16  
17  
18 Fifth, there may be additional unmeasured confounders that have impacted on our results. For example,  
19 surrounding Primary Care systems may impact on the efficiency with which the acute Trusts function. Or  
20 alternatively, competition from independent sector treatment centres (ISTCs) may lead to a loss of  
21 revenue and market share for some Trusts, who may then need to invest more of their operating funds in  
22 attracting patients, especially given an increasing emphasis on patient choice and the freedom for  
23 patients to select hospitals by publicly reported outcomes. We adjusted for hospital size in the form of  
24 number of beds as well as using operating margin as a more standardised measure of financial  
25 performance than gross surplus or deficit (as turnover showed wide variation between trusts). Trusts that  
26 treat greater volumes of patients may benefit from economies of scale. However, as with any  
27 observational research, we cannot fully discount the impact of confounding on our results. For example,  
28 financial underperformance may be a signal of general underperformance in a Trust where clinical and  
29 other functions that might be suboptimal affect outcomes. Sixth, we are limited to demonstrating  
30 associations rather than causal links.  
31  
32  
33  
34  
35  
36  
37  
38  
39  
40  
41  
42  
43  
44  
45

## 46 **Conclusions and policy implications**

47  
48 Notwithstanding limitations, our findings have important ramifications for clinical leads, managers and  
49 policy makers. The relationship between financial performance and clinical outcomes is far more  
50 complex and associated with myriad other factors which will vary among Trusts. Trusts with financial  
51 deficits may be spending more than they can afford (for example, on extra nursing staff) and one could  
52 therefore argue that higher quality should be expected for this extra financial outlay. Conversely, the  
53  
54  
55  
56  
57  
58  
59  
60

1 existence of such deficit might instead indicate reduced efficiency and challenged management.

2 Alternatively, financial penalties due to poor clinical performance or financial management could  
3 exacerbate deficits. For example, marginal rate payment reductions for emergency admissions, penalties  
4 for readmissions and withholding payment for cases resulting in never events. Attempts to redress this  
5 balance may inadvertently lead to reflex spending cuts and poorer quality care. The role of clinical leads,  
6 management and leadership within a Trust is likely to be a key contributor to how financial deficits impact  
7 quality of care. For example, cutting down on management personnel to save costs may result in worse  
8 productivity if clinicians have to allocate more time to administrative activities and away from revenue  
9 producing clinical activities.  
10  
11  
12  
13  
14  
15  
16  
17  
18  
19

20 There are a number of specific points to consider also. First, there is substantial variation between  
21 Trusts, which in some cases is worsening. Between the best and worst financially performing Trusts,  
22 there are up-to 2-fold differences in agency spend, delayed transfers of care, A&E breaches and cancer  
23 waiting times. This is notable and needs to be explicitly tackled with greater efficacy. While national  
24 regulators such as the Care Quality Commission (CQC) and NHS Improvement do seek to support  
25 challenged Trusts, the effectiveness of this has not necessarily translated into improved performance  
26 metrics.  
27  
28  
29  
30  
31  
32  
33  
34  
35

36 Second, the lack of significant association between operating margin and either readmissions or  
37 inpatient satisfaction may suggest that clinical outcomes are more resilient to financial pressures than  
38 process measures, or that the driver for such clinical metrics is not predominantly financial-based. Third,  
39 the recent narrowing of variation between the best and worst performing Trusts on the measures of A&E  
40 targets and delayed transfers of care, may be a cause for concern, suggesting that now even the best  
41 financially performing Trusts are struggling to manage demand. This indicates that a more system-wide  
42 approach to demand-management and improving Trust performance may be required to address the  
43 identified deteriorations, given the entire Trust cohort is now showing signs of deterioration. Stated  
44 plainly, it seems that even if best practice is adopted from the most well managed Trusts, demands on  
45 secondary and tertiary care may not be adequately addressed.  
46  
47  
48  
49  
50  
51  
52  
53  
54  
55  
56  
57  
58  
59  
60

1 Finally, our inability to demonstrate causal links on the available macro level public data re-emphasises  
2 the need for higher quality interventional studies such as cluster randomised trials specifically assessing  
3 policy impacts before implementation en masse. Furthermore, studies assessing the micro level  
4 spending decisions by Trusts when confronted by financial pressures may also lend more insight into the  
5 causal pathway and suggest appropriate targets for intervention.  
6  
7  
8  
9

## 10 11 12 **Summary**

13  
14 Notwithstanding limitations, our results demonstrate that operating margins at English NHS Trusts have  
15 progressively worsened over 2011-16, and that this change correlates with poorer Trust performance on  
16 a range of widely benchmarked process measures, but not significantly with readmissions or inpatient  
17 satisfaction. The variation between the best and worst financially performing Trusts was considerably  
18 larger for A&E breach rates and delayed transfers of care than for cancer targets but showed differing  
19 patterns of variation over time. The causal nature of relationships between financial performance,  
20 process measures and outcomes remains difficult to disentangle.  
21  
22  
23  
24  
25  
26  
27  
28  
29  
30  
31  
32  
33  
34  
35  
36  
37  
38  
39  
40  
41  
42  
43  
44  
45  
46  
47  
48  
49  
50  
51  
52  
53  
54  
55  
56  
57  
58  
59  
60

## RESEARCH IN CONTEXT

### Evidence before this study

We searched the scientific literature to identify original research articles assessing the macro-level association between financial performance and outcomes in the NHS and how such outcomes vary between the best and worst financially performing Trusts. We searched PubMed for manuscripts published in any language up to and including August 15<sup>th</sup> 2017, using the following search terms: ("NHS"[Ti] OR "National health service"[Ti] OR ("English"[Ti] AND "Hospital"[Tiab])) AND ("Variation"[Tiab] or "Outcome"[Tiab]). 550 records were retrieved but none were deemed includable.

### Added value of this study

Most of the extant literature comes from the United States and direct comparison is fraught with difficulty. Our study is the largest analysis to date of the association between financial performance, as measured by operating margin, and outcomes at English NHS Trusts. Operating margins in English NHS trusts progressively worsened during 2011-16, and this change was associated with poorer performance on several process measures but not with hospital readmissions or inpatient satisfaction. Significant variation exists between the best and worst financially performing Trusts.

### Implications of all the available evidence

The causal nature of relationships between financial performance, process measures and outcomes remains problematic to entangle but specific findings from our study merit further consideration. The lack of significant association between operating margin and either readmissions or inpatient satisfaction may suggest that clinical outcomes are more resilient to financial pressures than process measures, or that the driver for such clinical metrics is not predominantly financial-based. The recent narrowing of variation between the best and worst performing Trusts on the measures of A&E targets and delayed transfers of care, may be a cause for concern, suggesting that now even the best financially performing Trusts are struggling to manage demand.

## CONTRIBUTORSHIP

MN and MM conceived the study. RR and RA had critical input into study direction and interpretation. MN and GK extracted and sorted data for the study. MN performed the analysis and wrote the first draft of the manuscript. All authors (MN, GK, RR, RA, MM) contributed to critical revision of the manuscript for important intellectual content and approved the final version. MN and MM are the guarantors.

## ACKNOWLEDGEMENTS

BMJ Open Peer Reviewers whose suggestions have been incorporated into the manuscript.

## DECLARATION OF INTERESTS

All authors have completed the ICMJE uniform disclosure at [www.icmje.org/coi\\_disclosure.pdf](http://www.icmje.org/coi_disclosure.pdf). Mahiben Maruthappu serves as NHS England's Innovation Adviser and is an investor and employee of Cera Care which is a domiciliary care provider. All authors declare no support from any organisation for the submitted work, no financial relationships with any organisations that might have an interest in the submitted work in the previous three years and no other relationships or activities that could appear to have influenced the submitted work.

## FUNDING

No specific funding for this study.

## SPONSOR

No sponsor for this study.

## DATA SHARING

Raw data and analysis available on request from authors.

## TRANSPARENCY STATEMENT

1 The study guarantors (MN and MM) affirm that the manuscript is an honest, accurate, and transparent  
2 account of the study being reported; that no important aspects of the study have been omitted; and that  
3 any discrepancies from the study as planned have been explained.  
4  
5  
6  
7

## 8 **ETHICS**

9  
10 No ethical approval required as retrospective longitudinal observational study of publicly available Trust-  
11 level data.  
12  
13  
14  
15  
16  
17  
18  
19  
20  
21  
22  
23  
24  
25  
26  
27  
28  
29  
30  
31  
32  
33  
34  
35  
36  
37  
38  
39  
40  
41  
42  
43  
44  
45  
46  
47  
48  
49  
50  
51  
52  
53  
54  
55  
56  
57  
58  
59  
60

**REFERENCES**

1. Lorenzoni L, Belloni A, Sassi F. Health-care expenditure and health policy in the USA versus other high-spending OECD countries. *Lancet* 2014; 384(9937): 83-92.
2. NHS England. Five Year Forward View. 2014. Available online at: <http://www.england.nhs.uk/wp-content/uploads/2014/10/5yfv-web.pdf> (last accessed 29 August 2017).
3. Gulland A. NHS chief warns of more financial challenges. *BMJ* 2017; 356: J212.
4. NHS Improvement. 10 ways for NHS providers to find savings and make cost improvements. 2016. Available online at: [https://improvement.nhs.uk/uploads/documents/FIP\\_-\\_where\\_to\\_look\\_to\\_make\\_NHS\\_savings.pdf](https://improvement.nhs.uk/uploads/documents/FIP_-_where_to_look_to_make_NHS_savings.pdf) (last accessed 29 August 2017).
5. Campbell D, Morris S, Marsh S. NHS faces 'humanitarian crisis' as demand rises, British Red Cross warns. 2017. Available online at: <https://www.theguardian.com/society/2017/jan/06/nhs-faces-humanitarian-crisis-rising-demand-british-red-cross> (last accessed 29 August 2017).
6. NHS Improvement. Quarterly performance of the NHS provider sector: quarter 3 2016/17. 2017. Available online at: <https://improvement.nhs.uk/resources/quarterly-performance-nhs-provider-sector-quarter-3-1617/> (last accessed 29 August 2017).
7. NHS England. NHS England Business Plan. 2016. Available online at: <https://www.england.nhs.uk/wp-content/uploads/2016/03/bus-plan-16.pdf> (last accessed 29 August 2017).
8. Hopson C. We need to be honest and realistic about what is deliverable at the NHS front line. 2017. Available online at: <http://blogs.bmj.com/bmj/2017/01/29/chris-hopson-we-need-to-be-honest-and-realistic-about-what-is-deliverable-at-the-nhs-front-line/> (last accessed 29 August 2017).
9. QualityWatch. Indicators. Available online at: <http://www.qualitywatch.org.uk/indicators-results> (last accessed 7 May 2018).
10. Gov.uk. NHS trusts accounts data for 2015 to 2016. 2016. Available online at: <https://www.gov.uk/government/publications/nhs-trusts-accounts-data-for-2015-to-2016> (last accessed 29 August 2017).
11. Gov.uk. The Quarter, quarter 4 2010/11. 2011. Available online at: <https://www.gov.uk/government/publications/the-quarter-quarter-4-2010-11> (last accessed 29 August 2017).
12. NHS England. Bed Availability and Occupancy. 2017. Available online at: <https://www.england.nhs.uk/statistics/statistical-work-areas/bed-availability-and-occupancy/> (last accessed 29 August 2017).
13. Association of UK University Hospital Trusts. List of AUKUH Members. 2016. Available online at: <http://www.aukuh.org.uk/index.php/members/aukuh-members> (last accessed 29 August 2017).
14. Gov.uk. English indices of deprivation 2015. 2015. Available online at: <https://www.gov.uk/government/statistics/english-indices-of-deprivation-2015> (last accessed 29 August 2017).



- 1 15. NHS England. Statistical Work Areas. 2017. Available online at:  
2 <https://www.england.nhs.uk/statistics/statistical-work-areas/> (last accessed 29 August 2017).
- 3 16. NHS Surveys. Current surveys. 2017. Available online at: <http://www.nhssurveys.org/surveys>  
4 (last accessed 29 August 2017).
- 5 17. Bazzoli GJ, Chen HF, Zhao M, Lindrooth RC. Hospital financial condition and the quality of  
6 patient care. *Health Econ* 2008; 17(8): 977-95.
- 7 18. Encinosa WE, Bernard DM. Hospital finances and patient safety outcomes. *Inquiry* 2005; 42(1):  
8 60-72.
- 9 19. Joynt KE, Orav EJ, Jha AK. Association between hospital conversions to for-profit status and  
10 clinical and economic outcomes. *Jama* 2014; 312(16): 1644-52.
- 11 20. Volpp KG, Konetzka RT, Zhu J, Parsons L, Peterson E. Effect of cuts in Medicare reimbursement  
12 on process and outcome of care for acute myocardial infarction patients. *Circulation* 2005; 112(15):  
13 2268-75.
- 14 21. Ly DP, Jha AK, Epstein AM. The association between hospital margins, quality of care, and  
15 closure or other change in operating status. *J Gen Intern Med* 2011; 26(11): 1291-6.
- 16 22. Aiken LH, Sloane DM, Bruyneel L, et al. Nurse staffing and education and hospital mortality in  
17 nine European countries: a retrospective observational study. *Lancet* 2014; 383(9931): 1824-30.
- 18 23. The Health Foundation. System-wide problems driving NHS deficit. 2016. Available online at:  
19 <http://www.health.org.uk/news/system-wide-problems-driving-nhs-deficit> (last accessed 29 August 2017).
- 20
- 21
- 22
- 23
- 24
- 25
- 26
- 27
- 28
- 29
- 30
- 31
- 32
- 33
- 34
- 35
- 36
- 37
- 38
- 39
- 40
- 41
- 42
- 43
- 44
- 45
- 46
- 47
- 48
- 49
- 50
- 51
- 52
- 53
- 54
- 55
- 56
- 57
- 58
- 59
- 60

## FIGURE LEGENDS

**Figure 1. Distribution of average operating surplus/deficit over the 2011-16 period.**

**Figure 2. Trends in operating margin and clinical outcomes over time.**

**Figure 3. Trends in operating margin and process measures over time.** Abbreviations: A&E, Accident & Emergency.

**Figure 4. 2011-12 correlation between delayed transfers of care, elective operation cancellations, agency spend, A&E breaches and operating margin.** Elective surgery cancellations are last-minute elective operation cancellations (for non-clinical reasons) standardised in this figure to number of available beds at the Trust (as a proxy for hospital capacity). Agency spend is displayed as a proportion of turnover. Operating margin is as defined in study methods. Abbreviations: A&E, Accident & Emergency; DTOC, delayed transfer of care.

**Figure 5. 2015-16 correlation between delayed transfers of care, elective operation cancellations, agency spend, A&E breaches and operating margin.** Elective surgery cancellations are last-minute elective operation cancellations (for non-clinical reasons) standardised in this figure to number of available beds at the Trust (as a proxy for hospital capacity). Agency spend is displayed as a proportion of turnover. Operating margin is as defined in study methods. Abbreviations: A&E, Accident & Emergency; DTOC, delayed transfer of care.

## TABLE LEGENDS

**Table 1. Trust metrics by decile of Trust operating margin.** Higher deprivation score indicates more deprivation.

**Table 2. Outcomes and process measures by decile of Trust operating margin.** Values are median (IQR). P-value refers to a one-way analysis of variance (ANOVA) test. Abbreviations: A&E, Accident & Emergency.

**Table 3. Variation in outcomes and process measures over time by Trust financial performance.** 'Best 10%' refers to Trusts with operating margins in the top 10% of the sample. 'Worst 10%' refers to Trusts with operating margins in the bottom 10% of the sample.

**Table 4. Association of operating margin with outcomes and process measures.** These estimates are derived from a linear regression with outcome/process measure as the dependent variable and the following independent variables: operating margin, number of beds available and year. Each Trust in each year was treated as a separate observation with standard errors clustered by Trust to account for the non-independence of Trust-level data. Abbreviations: A&E, Accident & Emergency; CI, confidence interval.

**Table 5. Outcomes and process measures in trusts struggling (i.e. in special measures or subject to enforcement action) versus those that are not.** Values are median (IQR). P-value refers to a Kruskal-Wallis equality-of-populations rank test.

Table 1. Trust metrics by decile of Trust operating margin.

|                                                                 | Operating margin       |                      |                     |                   |
|-----------------------------------------------------------------|------------------------|----------------------|---------------------|-------------------|
|                                                                 | Bottom 10%             | 11-50%               | 51-89%              | Top 10%           |
| <b>Operating surplus / deficit (£ millions, median (range))</b> | -30.9 (-61.1 to -12.4) | -6.3 (-63.1 to -1.2) | -1.5 (-13.8 to 6.8) | 5.4 (1.3 to 32.6) |
| <b>Agency spend as proportion of turnover (%)</b>               | 6.9 (2.0)              | 4.8 (2.4)            | 3.8 (2.0)           | 3.9 (1.2)         |
| <b>Consultancy spend as proportion of turnover (%)</b>          | 0.96 (0.54)            | 0.44 (0.35)          | 0.45 (0.74)         | 0.46 (0.29)       |
| <b>Annual admissions, mean (SD)</b>                             | 26,978 (9,698)         | 29,006 (13,326)      | 36,411 (21,300)     | 30,445 (12,455)   |
| <b>Annual outpatient attendances, mean (SD)</b>                 | 271,508 (109,938)      | 295,223 (142,784)    | 374,266 (210,861)   | 407,595 (209,956) |
| <b>Bed availability, mean (SD)</b>                              | 716 (267)              | 718 (321)            | 822 (387)           | 740 (226)         |
| <b>Bed occupancy (%)</b>                                        | 90.1                   | 88.3                 | 87.2                | 88.1              |
| <b>Deprivation score, mean (SD)</b>                             | 23.4 (11.8)            | 19.2 (13.2)          | 23.3 (14.6)         | 23.5 (11.9)       |
| <b>Teaching trust (%)</b>                                       | 6.7                    | 17.0                 | 33.3                | 35.7              |
| <b>Region (%)</b>                                               |                        |                      |                     |                   |
| London                                                          | 20                     | 17                   | 17                  | 21                |
| South                                                           | 20                     | 17                   | 38                  | 7                 |
| Midlands                                                        | 40                     | 36                   | 15                  | 29                |
| North                                                           | 20                     | 31                   | 30                  | 43                |

**Table 2. Outcomes/process measures by decile of Trust operating margin.**

|                                                               | Operating margin    |                     |                     |                     | p-value |
|---------------------------------------------------------------|---------------------|---------------------|---------------------|---------------------|---------|
|                                                               | Bottom 10%          | 11-50%              | 51-89%              | Top 10%             |         |
| <b>Readmission rate (%)</b>                                   | 3.6 (3.4 to 3.9)    | 3.6 (3.1 to 3.9)    | 3.7 (3.2 to 4.0)    | 3.3 (3.0 to 3.8)    | 0.137   |
| <b>Inpatient satisfaction score (out of 10)</b>               | 8.0 (7.8 to 8.2)    | 8.0 (7.8 to 8.2)    | 7.9 (7.7 to 8.1)    | 7.9 (7.7 to 8.2)    | <0.001  |
| <b>4 hour A&amp;E target breach rate (%)</b>                  | 10.2 (6.7 to 15.1)  | 6.7 (4.9 to 10.7)   | 5.3 (4.2 to 7.3)    | 5.3 (3.9 to 6.7)    | <0.001  |
| <b>Delayed transfer of care days per hospital bed</b>         | 11.1 (6.0 to 17.1)  | 7.4 (4.5 to 10.9)   | 6.5 (3.7 to 11.0)   | 5.7 (2.6 to 8.1)    | <0.001  |
| <b>Cancer two week wait target adherence (%)</b>              | 94.9 (93.2 to 96.2) | 95.5 (94.2 to 96.7) | 95.4 (94.4 to 96.7) | 95.6 (95.0 to 96.5) | 0.009   |
| <b>Cancer 62 days to first treatment target adherence (%)</b> | 86.2 (81.9 to 88.2) | 86.6 (83.6 to 89.1) | 87.6 (85.6 to 89.6) | 88.0 (86.3 to 89.9) | <0.001  |

Table 3. Variation in outcomes and process measures over time by Trust financial performance.

| Readmissions (%)                                  |       |       |       |       |       |       |
|---------------------------------------------------|-------|-------|-------|-------|-------|-------|
|                                                   | 2011  | 2012  | 2013  | 2014  | 2015  | 2016  |
| <b>Worst 10%</b>                                  | -     | -     | -     | 3.6   | 3.7   | 3.8   |
| <b>Middle 80%</b>                                 | -     | -     | -     | 3.4   | 3.6   | 3.6   |
| <b>Best 10%</b>                                   | -     | -     | -     | 3.4   | 3.5   | 3.6   |
| <b>Ratio of worst to best</b>                     | -     | -     | -     | 1.1   | 1.0   | 1.1   |
| <b>Difference (best and worst)</b>                | -     | -     | -     | 0.2   | 0.1   | 0.2   |
| Inpatient satisfaction survey (score out of 10)   |       |       |       |       |       |       |
|                                                   | 2011  | 2012  | 2013  | 2014  | 2015  | 2016  |
| <b>Worst 10%</b>                                  | 7.5   | 7.7   | 7.9   | 7.9   | 8.0   | 8.0   |
| <b>Middle 80%</b>                                 | 7.7   | 7.8   | 7.9   | 8.0   | 8.1   | 8.1   |
| <b>Best 10%</b>                                   | 7.8   | 7.8   | 7.9   | 8.0   | 8.1   | 8.1   |
| <b>Ratio of worst to best</b>                     | 1.0   | 1.0   | 1.0   | 1.0   | 1.0   | 1.0   |
| <b>Difference (best and worst)</b>                | 0.3   | 0.1   | 0.0   | 0.1   | 0.1   | 0.1   |
| Accident & Emergency breach rate (%)              |       |       |       |       |       |       |
|                                                   | 2011  | 2012  | 2013  | 2014  | 2015  | 2016  |
| <b>Worst 10%</b>                                  | 8.2   | 6.4   | 7.8   | 7.8   | 11.9  | 13.6  |
| <b>Middle 80%</b>                                 | 5.2   | 4.9   | 6.0   | 6.3   | 9.3   | 12.0  |
| <b>Best 10%</b>                                   | 4.2   | 4.5   | 5.5   | 5.9   | 7.5   | 10.4  |
| <b>Ratio of worst to best</b>                     | 2.0   | 1.4   | 1.4   | 1.3   | 1.6   | 1.3   |
| <b>Difference (best and worst)</b>                | 4.0   | 1.9   | 2.3   | 1.9   | 4.4   | 3.2   |
| Delayed transfers of care days                    |       |       |       |       |       |       |
|                                                   | 2011  | 2012  | 2013  | 2014  | 2015  | 2016  |
| <b>Worst 10%</b>                                  | 5,077 | 6,657 | 7,248 | 6,972 | 7,813 | 8,284 |
| <b>Middle 80%</b>                                 | 4,851 | 5,082 | 5,558 | 6,046 | 7,311 | 8,044 |
| <b>Best 10%</b>                                   | 3,850 | 3,722 | 3,884 | 3,932 | 5,712 | 6,477 |
| <b>Ratio of worst to best</b>                     | 1.3   | 1.8   | 1.9   | 1.8   | 1.4   | 1.3   |
| <b>Difference (best and worst)</b>                | 1,227 | 2,935 | 3,364 | 3,040 | 2,101 | 1,807 |
| Cancer two week wait target breach rate (%)       |       |       |       |       |       |       |
|                                                   | 2011  | 2012  | 2013  | 2014  | 2015  | 2016  |
| <b>Worst 10%</b>                                  | 4.2   | 4.2   | 4.6   | 4.8   | 6.2   | 5.9   |
| <b>Middle 80%</b>                                 | 4.3   | 3.9   | 4.3   | 4.4   | 5.7   | 5.5   |
| <b>Best 10%</b>                                   | 4.6   | 4.1   | 4.0   | 4.6   | 5.9   | 5.2   |
| <b>Ratio of worst to best</b>                     | 0.9   | 1.0   | 1.2   | 1.0   | 1.1   | 1.1   |
| <b>Difference (best and worst)</b>                | -0.4  | 0.1   | 0.6   | 0.2   | 0.3   | 0.7   |
| Cancer 62 days to first treatment breach rate (%) |       |       |       |       |       |       |
|                                                   | 2011  | 2012  | 2013  | 2014  | 2015  | 2016  |
| <b>Worst 10%</b>                                  | 11.9  | 11.7  | 12.2  | 13.7  | 16.6  | 18.3  |
| <b>Middle 80%</b>                                 | 12.1  | 12.0  | 12.2  | 13.4  | 15.6  | 16.2  |
| <b>Best 10%</b>                                   | 11.9  | 11.7  | 10.0  | 11.7  | 13.5  | 15.2  |
| <b>Ratio of worst to best</b>                     | 1.0   | 1.0   | 1.2   | 1.2   | 1.2   | 1.2   |
| <b>Difference (best and worst)</b>                | 0.0   | 0.0   | 2.2   | 2.0   | 3.1   | 3.1   |

**Table 4. Association of operating margin on outcomes and process measures.**

| Outcome                                         | n   | Trust clusters | Coefficient | 95% CI          | p-value |
|-------------------------------------------------|-----|----------------|-------------|-----------------|---------|
| Readmission rate (%)                            | 387 | 135            | -0.012      | -0.029 to 0.005 | 0.164   |
| Inpatient satisfaction score (out of 10)        | 825 | 148            | 0.80        | -0.06 to 1.67   | 0.067   |
| A&E 4 hour breach rate (%)                      | 835 | 148            | -0.24       | -0.33 to -0.15  | <0.001  |
| Delayed transfers of care days per hospital bed | 837 | 148            | -25.1       | -39.1 to -11.0  | 0.001   |
| 2 week wait cancer target adherence (%)         | 833 | 148            | 0.05        | 0.00 to 0.09    | 0.031   |
| 62 day cancer treatment target adherence (%)    | 833 | 148            | 0.12        | 0.03 to 0.21    | 0.009   |

**Table 5. Outcomes and process measures in trusts struggling (i.e. in special measures or subject to enforcement action) versus those that are not.**

|                                                        | Struggling trust    | Non-struggling trust | p-value |
|--------------------------------------------------------|---------------------|----------------------|---------|
| Readmission rate (%)                                   | 3.6 (3.1 to 3.9)    | 3.7 (3.1 to 3.9)     | 0.285   |
| Inpatient satisfaction score (out of 10)               | 7.9 (7.8 to 8.1)    | 7.9 (7.8 to 8.1)     | 0.378   |
| A&E 4 hour target breach rate (%)                      | 6.8 (5.2 to 10.2)   | 5.5 (4.2 to 8.3)     | <0.001  |
| Delayed transfer of care days per hospital bed         | 8.2 (4.5 to 11.9)   | 6.4 (4.0 to 10.4)    | 0.005   |
| Cancer two week wait target adherence (%)              | 95.1 (94.0 to 96.4) | 95.5 (94.4 to 96.8)  | 0.002   |
| Cancer 62 days to first treatment target adherence (%) | 86.6 (83.7 to 88.9) | 87.4 (84.8 to 89.6)  | 0.002   |

1  
2  
3  
4  
5  
6  
7  
8  
9  
10  
11  
12  
13  
14  
15  
16  
17  
18  
19  
20  
21  
22  
23  
24  
25  
26  
27  
28  
29  
30  
31  
32  
33  
34  
35  
36  
37  
38  
39  
40  
41  
42  
43  
44  
45  
46  
47  
48  
49  
50  
51  
52  
53  
54  
55  
56  
57  
58  
59  
60

For peer review only



1  
2  
3  
4  
5  
6  
7  
8  
9  
10  
11  
12  
13  
14  
15  
16  
17  
18  
19  
20  
21  
22  
23  
24  
25  
26  
27  
28  
29  
30  
31  
32  
33  
34  
35  
36  
37  
38  
39  
40  
41  
42  
43  
44  
45  
46  
47  
48  
49  
50  
51  
52  
53  
54  
55  
56  
57  
58  
59  
60

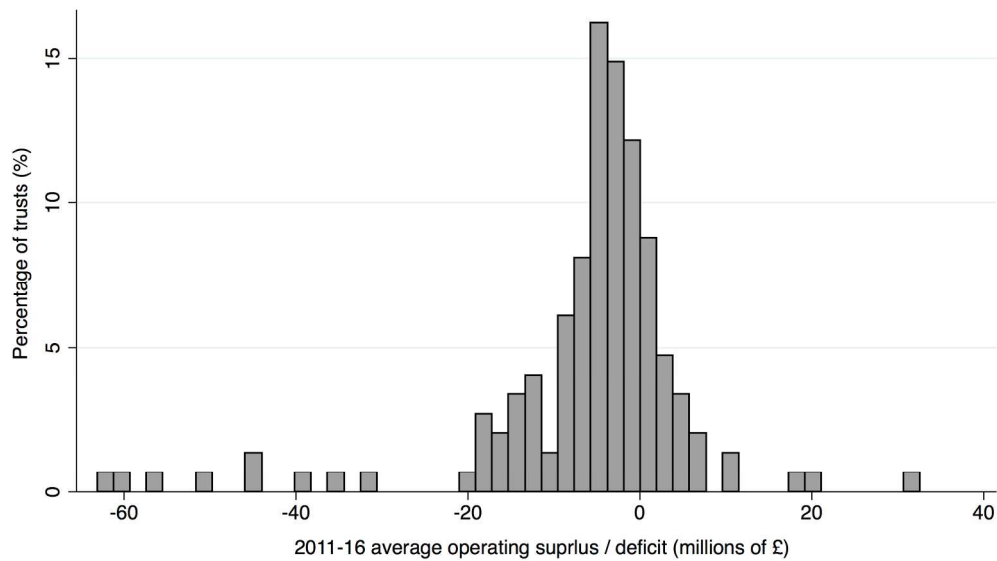

Figure 1. Distribution of average operating surplus/deficit over the 2011-16 period.

review only

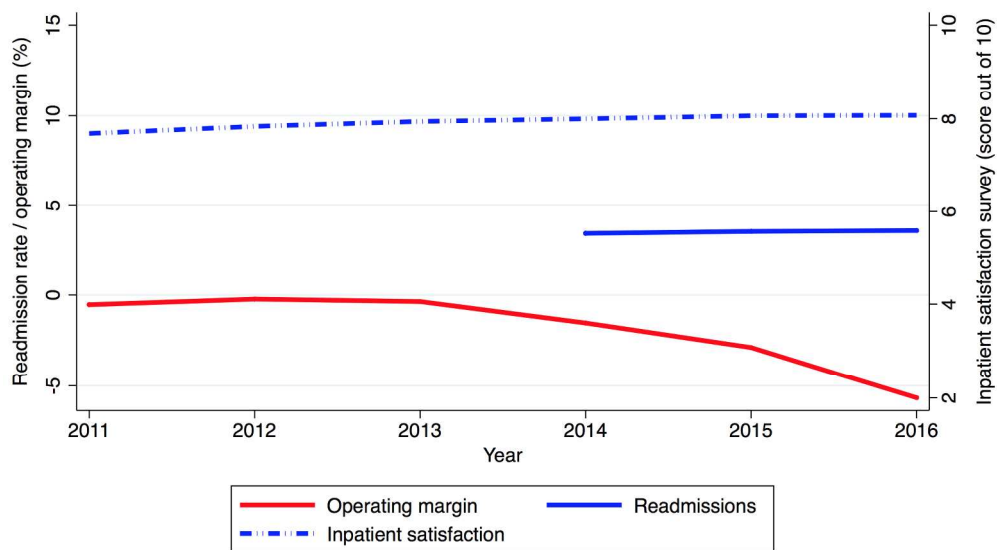

Figure 2. Trends in operating margin and clinical outcomes over time.

review only

1  
2  
3  
4  
5  
6  
7  
8  
9  
10  
11  
12  
13  
14  
15  
16  
17  
18  
19  
20  
21  
22  
23  
24  
25  
26  
27  
28  
29  
30  
31  
32  
33  
34  
35  
36  
37  
38  
39  
40  
41  
42  
43  
44  
45  
46  
47  
48  
49  
50  
51  
52  
53  
54  
55  
56  
57  
58  
59  
60

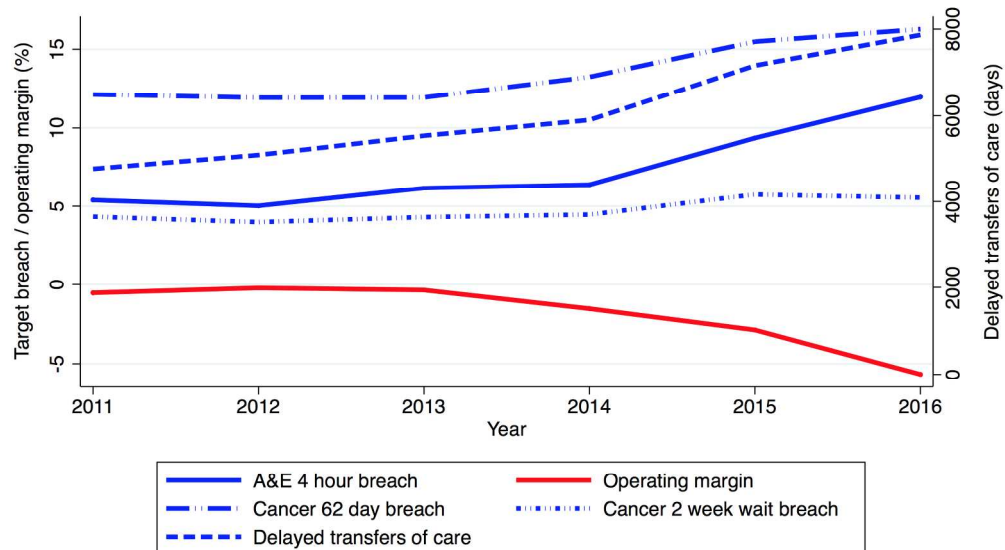

Figure 3. Trends in operating margin and process measures over time. Abbreviations: A&E, Accident & Emergency.

review only

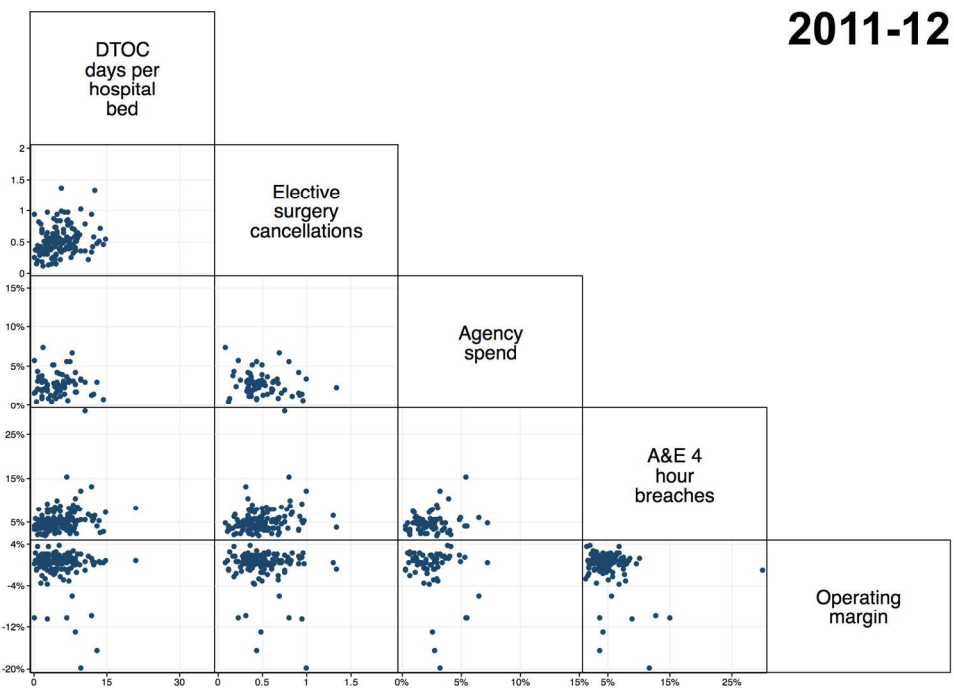

Figure 4. 2011-12 correlation between delayed transfers of care, elective operation cancellations, agency spend, A&E breaches and operating margin. Elective surgery cancellations are last-minute elective operation cancellations (for non-clinical reasons) standardised in this figure to number of available beds at the Trust (as a proxy for hospital capacity). Agency spend is displayed as a proportion of turnover. Operating margin is as defined in study methods. Abbreviations: A&E, Accident & Emergency; DTOC, delayed transfer of care.

www only

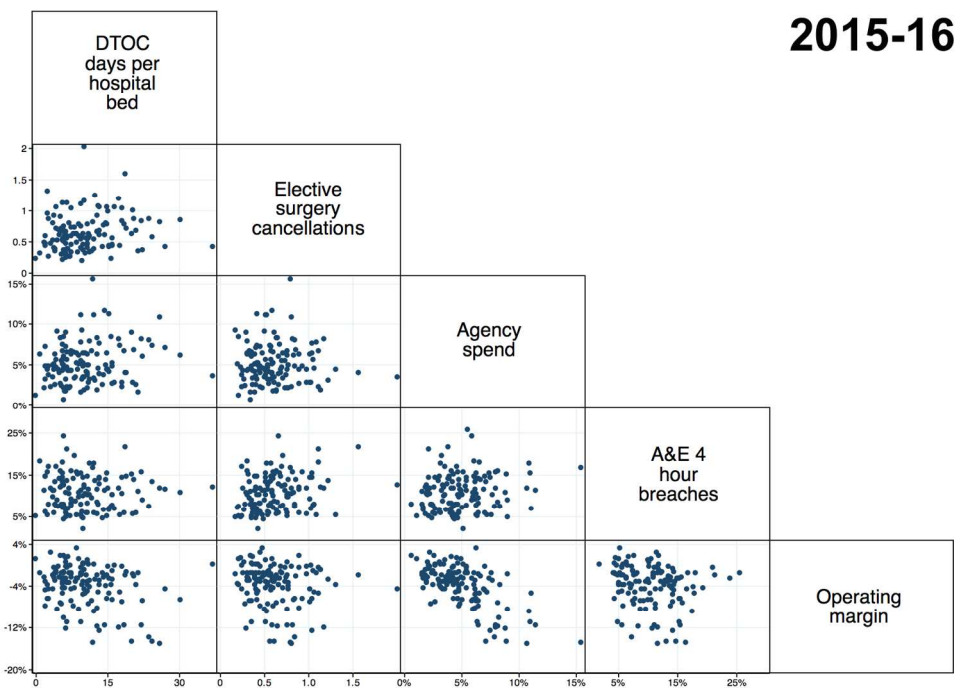

Figure 5. 2015-16 correlation between delayed transfers of care, elective operation cancellations, agency spend, A&E breaches and operating margin. Elective surgery cancellations are last-minute elective operation cancellations (for non-clinical reasons) standardised in this figure to number of available beds at the Trust (as a proxy for hospital capacity). Agency spend is displayed as a proportion of turnover. Operating margin is as defined in study methods. Abbreviations: A&E, Accident & Emergency; DTOC, delayed transfer of care.

# Financial Performance of English NHS Trusts and Clinical Outcomes: A Longitudinal Observational Study

## ONLINE SUPPLEMENTAL DATA

Myura Nagendran, MRCP<sup>1</sup>

Grace Kiew, MB BChir<sup>2</sup>

Rosalind Raine, PhD<sup>3</sup>

Rifat Atun, FRCP<sup>4</sup>

Mahiben Maruthappu, BM BCh<sup>5</sup>

1. Honorary Clinical Research Fellow, Division of Anaesthetics, Pain Medicine and Intensive Care, Imperial College London, UK
2. Foundation Doctor, North West Anglia NHS Foundation Trust, Peterborough, UK
3. Professor, Department of Applied Health Care, University College London, UK
4. Professor, Harvard T.H. Chan School of Public Health, Harvard University, Boston, MA, USA
5. Public Health Registrar, Department of Epidemiology and Public Health, University College London, UK

**Supplement version:** 2.1

## FINANCIAL DATA EXTRACTION

Where financial data was extracted from consolidated end of year accounts files via the gov.uk open data portal, the following fields were extracted:

### For foundation trusts:

Turnover --> Table ID 1, Subcode 100  
Surplus/Deficit --> Table ID 1, Subcode 160  
Consultancy --> 07A and 07I, subcode 280  
Agency spend --> 1415TRU06\_EXP\_P13, maincode 01, subcode 180

### For non-Foundation trusts:

Turnover --> Table ID CNE, Subcode 120 and 130  
Surplus/Deficit --> Table ID CNE, Subcode 390  
Consultancy --> 08C, subcode 125 (*only available for 2014-16*)  
Agency spend --> 1415TRU09\_EMP\_P13, maincode 04, subcode 100 (*only available for 2015-16*)

## 1 DELAYED TRANSFERS OF CARE IN FINANCIAL YEAR ENDING 2011

2  
3  
4 Delayed transfer of care data were only available at Trust level for the latter eight months of the  
5 2011 financial year. To ensure comparability with other years, a 1.5x multiplier was applied for  
6 each trust in this financial year with a sensitivity analysis to examine any impact of this change.  
7  
8  
9

10  
11 The total numbers of delayed transfers for all hospitals were available as an aggregate total  
12 (data obtained from King's Fund Quarterly Monitoring Report for 2010-11).  
13  
14  
15

16 The ratio of aggregate delayed transfer of care days for the first 4 months (April 2010 to July  
17 2010) to the last 8 months (August 2010 to March 2011) was 0.492; suggesting that a 1.5x  
18 multiplier appeared reasonable.  
19  
20  
21  
22  
23

| Year | Month | Number of DTOCs | 4-monthly total |
|------|-------|-----------------|-----------------|
| 2010 | Apr   | 113900          | -               |
| 2010 | May   | 112442          | -               |
| 2010 | Jun   | 115336          | -               |
| 2010 | Jul   | 109918          | <b>451596</b>   |
| -    | -     | -               | -               |
| 2010 | Aug   | 115855          | -               |
| 2010 | Sep   | 113246          | -               |
| 2010 | Oct   | 113091          | -               |
| 2010 | Nov   | 116466          | <b>458658</b>   |
| -    | -     | -               | -               |
| 2010 | Dec   | 114346          | -               |
| 2011 | Jan   | 112386          | -               |
| 2011 | Feb   | 123130          | -               |
| 2011 | Mar   | 109362          | <b>459224</b>   |



## CHANGES TO TRUST COMPOSITION

The 168 Trusts listed below include specialist Trusts (e.g. Great Ormond Street Hospital for Children NHS Foundation Trust) that were excluded prior to analysis. Changes in composition to the Trusts (creation of a new Trust, dissolution of an existing Trust, acquisitions of a hospital or entire Trust to another Trust and mergers between Trusts) are detailed at the end of the table.

| Trust                                                           | Trust identifier | Change in composition | Transitioned to Foundation status | Foundation Trust transition date |
|-----------------------------------------------------------------|------------------|-----------------------|-----------------------------------|----------------------------------|
| Aintree University Hospital NHS Foundation Trust                | REM              |                       |                                   |                                  |
| Airedale NHS Foundation Trust                                   | RCF              |                       | Yes                               | 01/06/2010                       |
| Alder Hey Children's NHS Foundation Trust                       | RBS              |                       |                                   |                                  |
| Ashford and St Peter's Hospitals NHS Foundation Trust           | RTK              |                       | Yes                               | 01/12/2010                       |
| Barking, Havering and Redbridge University Hospitals NHS Trust  | RF4              |                       |                                   |                                  |
| Barnet and Chase Farm Hospitals NHS Trust                       | RVL              | Yes (1)               |                                   |                                  |
| Barnsley Hospital NHS Foundation Trust                          | RFF              |                       |                                   |                                  |
| Barts and the London NHS Trust                                  | RNJ              | Yes (2)               |                                   |                                  |
| Barts Health NHS Trust                                          | R1H              | Yes (3)               |                                   |                                  |
| Basildon and Thurrock University Hospitals NHS Foundation Trust | RDD              |                       |                                   |                                  |
| Bedford Hospital NHS Trust                                      | RC1              |                       |                                   |                                  |
| Birmingham Children's Hospital NHS Foundation Trust             | RQ3              |                       |                                   |                                  |
| Birmingham Women's NHS Foundation Trust                         | RLU              |                       |                                   |                                  |
| Blackpool Teaching Hospitals NHS Foundation Trust               | RXL              |                       |                                   |                                  |
| Bolton NHS Foundation Trust                                     | RMC              |                       |                                   |                                  |
| Bradford Teaching Hospitals NHS Foundation Trust                | RAE              |                       |                                   |                                  |
| Brighton and Sussex University Hospitals NHS Trust              | RXH              |                       |                                   |                                  |
| Buckinghamshire Healthcare NHS Trust                            | RXQ              |                       |                                   |                                  |

|    |                                                                |     |         |     |            |
|----|----------------------------------------------------------------|-----|---------|-----|------------|
| 1  | Burton Hospitals NHS Foundation Trust                          | RJF |         |     |            |
| 2  | Calderdale and Huddersfield NHS Foundation Trust               | RWY |         |     |            |
| 3  | Cambridge University Hospitals NHS Foundation Trust            | RGT |         |     |            |
| 4  | Central Manchester University Hospitals NHS Foundation Trust   | RW3 | Yes (4) |     |            |
| 5  | Chelsea and Westminster Hospital NHS Foundation Trust          | RQM | Yes (5) |     |            |
| 6  | Chesterfield Royal Hospital NHS Foundation Trust               | RFS |         |     |            |
| 7  | City Hospitals Sunderland NHS Foundation Trust                 | RLN |         |     |            |
| 8  | Colchester Hospital University NHS Foundation Trust            | RDE |         |     |            |
| 9  | Countess Of Chester Hospital NHS Foundation Trust              | RJR |         |     |            |
| 10 | County Durham and Darlington NHS Foundation Trust              | RXP |         |     |            |
| 11 | Croydon Health Services NHS Trust                              | RJ6 |         |     |            |
| 12 | Dartford and Gravesham NHS Trust                               | RN7 |         |     |            |
| 13 | Derby Teaching Hospitals NHS Foundation Trust                  | RTG |         |     |            |
| 14 | Doncaster and Bassetlaw Hospitals NHS Foundation Trust         | RP5 |         |     |            |
| 15 | Dorset County Hospital NHS Foundation Trust                    | RBD |         |     |            |
| 16 | Ealing Hospital NHS Trust                                      | RC3 | Yes (6) |     |            |
| 17 | East and North Hertfordshire NHS Trust                         | RWH |         |     |            |
| 18 | East Cheshire NHS Trust                                        | RJN |         |     |            |
| 19 | East Kent Hospitals University NHS Foundation Trust            | RVV |         |     |            |
| 20 | East Lancashire Hospitals NHS Trust                            | RXR |         |     |            |
| 21 | East Sussex Healthcare NHS Trust                               | RXC |         |     |            |
| 22 | Epsom and St Helier University Hospitals NHS Trust             | RVR |         |     |            |
| 23 | Frimley Health NHS Foundation Trust                            | RDU | Yes (7) |     |            |
| 24 | Gateshead Health NHS Foundation Trust                          | RR7 |         |     |            |
| 25 | George Eliot Hospital NHS Trust                                | RLT |         |     |            |
| 26 | Gloucestershire Hospitals NHS Foundation Trust                 | RTE |         |     |            |
| 27 | Great Ormond Street Hospital for Children NHS Foundation Trust | RP4 |         | Yes | 01/03/2012 |
| 28 | Great Western Hospitals NHS Foundation Trust                   | RN3 |         |     |            |
| 29 | Guy's and St Thomas' NHS Foundation Trust                      | RJ1 |         |     |            |
| 30 | Hampshire Hospitals NHS Foundation Trust                       | RN5 | Yes (8) |     |            |

|    |                                                               |     |          |     |            |
|----|---------------------------------------------------------------|-----|----------|-----|------------|
| 1  | Harrogate and District NHS Foundation Trust                   | RCD |          |     |            |
| 2  | Heart Of England NHS Foundation Trust                         | RR1 |          |     |            |
| 3  | Heatherwood and Wexham Park Hospitals NHS Foundation Trust    | RD7 | Yes (9)  |     |            |
| 4  | Hinchingbrooke Health Care NHS Trust                          | RQQ |          |     |            |
| 5  | Homerton University Hospital NHS Foundation Trust             | RQX |          |     |            |
| 6  | Hull and East Yorkshire Hospitals NHS Trust                   | RWA |          |     |            |
| 7  | Imperial College Healthcare NHS Trust                         | RYJ |          |     |            |
| 8  | Ipswich Hospital NHS Trust                                    | RGQ |          |     |            |
| 9  | Isle Of Wight NHS Trust                                       | R1F | Yes (10) |     |            |
| 10 | James Paget University Hospitals NHS Foundation Trust         | RGP |          |     |            |
| 11 | Kettering General Hospital NHS Foundation Trust               | RNQ |          |     |            |
| 12 | King's College Hospital NHS Foundation Trust                  | RJZ | Yes (11) |     |            |
| 13 | Kingston Hospital NHS Foundation Trust                        | RAX |          | Yes | 01/05/2013 |
| 14 | Lancashire Teaching Hospitals NHS Foundation Trust            | RXN |          |     |            |
| 15 | Leeds Teaching Hospitals NHS Trust                            | RR8 |          |     |            |
| 16 | Lewisham and Greenwich NHS Trust                              | RJ2 | Yes (12) |     |            |
| 17 | Liverpool Heart and Chest NHS Foundation Trust                | RBQ |          |     |            |
| 18 | Liverpool Women's NHS Foundation Trust                        | REP |          |     |            |
| 19 | London North West Healthcare NHS Trust                        | R1K | Yes (13) |     |            |
| 20 | Luton and Dunstable University Hospital NHS Foundation Trust  | RC9 |          |     |            |
| 21 | Maidstone and Tunbridge Wells NHS Trust                       | RWF |          |     |            |
| 22 | Medway NHS Foundation Trust                                   | RPA |          |     |            |
| 23 | Mid Cheshire Hospitals NHS Foundation Trust                   | RBT |          |     |            |
| 24 | Mid Essex Hospital Services NHS Trust                         | RQ8 |          |     |            |
| 25 | Mid Staffordshire NHS Foundation Trust                        | RJD | Yes (14) |     |            |
| 26 | Mid Yorkshire Hospitals NHS Trust                             | RXF |          |     |            |
| 27 | Milton Keynes University Hospital NHS Foundation Trust        | RD8 |          |     |            |
| 28 | Moorfields Eye Hospital NHS Foundation Trust                  | RP6 |          |     |            |
| 29 | Newham University Hospital NHS Trust                          | RNH | Yes (15) |     |            |
| 30 | Norfolk and Norwich University Hospitals NHS Foundation Trust | RM1 |          |     |            |

|    |                                                                                    |     |          |     |            |
|----|------------------------------------------------------------------------------------|-----|----------|-----|------------|
| 1  | North Bristol NHS Trust                                                            | RVJ |          |     |            |
| 2  | North Cumbria University Hospitals NHS Trust                                       | RNL |          |     |            |
| 3  | North Middlesex University Hospital NHS Trust                                      | RAP |          |     |            |
| 4  | North Tees and Hartlepool NHS Foundation Trust                                     | RVW |          |     |            |
| 5  | North West London Hospitals NHS Trust                                              | RV8 | Yes (16) |     |            |
| 6  | Northampton General Hospital NHS Trust                                             | RNS |          |     |            |
| 7  | Northern Devon Healthcare NHS Trust                                                | RBZ |          |     |            |
| 8  | Northern Lincolnshire and Goole NHS Foundation Trust                               | RJL |          |     |            |
| 9  | Northumbria Healthcare NHS Foundation Trust                                        | RTF |          |     |            |
| 10 | Nottingham University Hospitals NHS Trust                                          | RX1 |          |     |            |
| 11 | Oxford University Hospitals NHS Foundation Trust                                   | RTH | Yes (17) | Yes | 01/10/2015 |
| 12 | Papworth Hospital NHS Foundation Trust                                             | RGM |          |     |            |
| 13 | Pennine Acute Hospitals NHS Trust                                                  | RW6 |          |     |            |
| 14 | Peterborough and Stamford Hospitals NHS Foundation Trust                           | RGN |          |     |            |
| 15 | Plymouth Hospitals NHS Trust                                                       | RK9 |          |     |            |
| 16 | Poole Hospital NHS Foundation Trust                                                | RD3 |          |     |            |
| 17 | Portsmouth Hospitals NHS Trust                                                     | RHU |          |     |            |
| 18 | Queen Victoria Hospital NHS Foundation Trust                                       | RPC |          |     |            |
| 19 | Robert Jones and Agnes Hunt Orthopaedic and District Hospital NHS Foundation Trust | RL1 |          | Yes | 01/08/2011 |
| 20 | Royal Berkshire NHS Foundation Trust                                               | RHW |          |     |            |
| 21 | Royal Brompton and Harefield NHS Foundation Trust                                  | RT3 |          |     |            |
| 22 | Royal Cornwall Hospitals NHS Trust                                                 | REF |          |     |            |
| 23 | Royal Devon and Exeter NHS Foundation Trust                                        | RH8 |          |     |            |
| 24 | Royal Free London NHS Foundation Trust                                             | RAL | Yes (18) | Yes | 01/04/2012 |
| 25 | Royal Liverpool and Broadgreen University Hospitals NHS Trust                      | RQ6 |          |     |            |
| 26 | Royal National Hospital For Rheumatic Diseases NHS Foundation Trust                | RBB | Yes (19) |     |            |
| 27 | Royal National Orthopaedic Hospital NHS Trust                                      | RAN |          |     |            |
| 28 | Royal Surrey County NHS Foundation Trust                                           | RA2 |          |     |            |
| 29 | Royal United Hospitals Bath NHS Foundation Trust                                   | RD1 | Yes (20) | Yes | 01/11/2014 |
| 30 | Salford Royal NHS Foundation Trust                                                 | RM3 |          |     |            |

|    |                                                                       |     |          |     |            |
|----|-----------------------------------------------------------------------|-----|----------|-----|------------|
| 1  | Salisbury NHS Foundation Trust                                        | RNZ |          |     |            |
| 2  | Sandwell and West Birmingham Hospitals NHS Trust                      | RXK |          |     |            |
| 3  | Scarborough and North East Yorkshire Healthcare NHS Trust             | RCC | Yes (21) |     |            |
| 4  | Sheffield Children's NHS Foundation Trust                             | RCU |          |     |            |
| 5  | Sheffield Teaching Hospitals NHS Foundation Trust                     | RHQ |          |     |            |
| 6  | Sherwood Forest Hospitals NHS Foundation Trust                        | RK5 |          |     |            |
| 7  | Shrewsbury and Telford Hospital NHS Trust                             | RXW |          |     |            |
| 8  | South London NHS Healthcare Trust                                     | RYQ | Yes (22) |     |            |
| 9  | South Tees Hospitals NHS Foundation Trust                             | RTR |          |     |            |
| 10 | South Tyneside NHS Foundation Trust                                   | RE9 |          |     |            |
| 11 | South Warwickshire NHS Foundation Trust                               | RJC |          |     |            |
| 12 | Southend University Hospital NHS Foundation Trust                     | RAJ |          |     |            |
| 13 | Southport and Ormskirk Hospital NHS Trust                             | RVY |          |     |            |
| 14 | St George's University Hospitals NHS Foundation Trust                 | RJ7 |          | Yes | 01/02/2015 |
| 15 | St Helens and Knowsley Hospitals NHS Trust                            | RBN |          |     |            |
| 16 | Stockport NHS Foundation Trust                                        | RWJ |          |     |            |
| 17 | Surrey and Sussex Healthcare NHS Trust                                | RTP |          |     |            |
| 18 | Tameside Hospital NHS Foundation Trust                                | RMP |          |     |            |
| 19 | Taunton and Somerset NHS Foundation Trust                             | RBA |          |     |            |
| 20 | The Christie NHS Foundation Trust                                     | RBV |          |     |            |
| 21 | The Clatterbridge Cancer Centre NHS Foundation Trust                  | REN |          |     |            |
| 22 | The Dudley Group NHS Foundation Trust                                 | RNA |          |     |            |
| 23 | The Hillingdon Hospitals NHS Foundation Trust                         | RAS |          | Yes | 01/04/2011 |
| 24 | The Newcastle Upon Tyne Hospitals NHS Foundation Trust                | RTD |          |     |            |
| 25 | The Princess Alexandra Hospital NHS Trust                             | RQW |          |     |            |
| 26 | The Queen Elizabeth Hospital, King's Lynn. NHS Foundation Trust       | RCX |          | Yes | 01/02/2011 |
| 27 | The Rotherham NHS Foundation Trust                                    | RFR |          |     |            |
| 28 | The Royal Bournemouth and Christchurch Hospitals NHS Foundation Trust | RDZ |          |     |            |
| 29 | The Royal Marsden NHS Foundation Trust                                | RPY |          |     |            |
| 30 | The Royal Orthopaedic Hospital NHS Foundation Trust                   | RRJ |          |     |            |

|    |                                                              |     |          |     |            |
|----|--------------------------------------------------------------|-----|----------|-----|------------|
| 1  | The Royal Wolverhampton NHS Trust                            | RL4 | Yes (23) |     |            |
| 2  | The Walton Centre NHS Foundation Trust                       | RET |          |     |            |
| 3  | The Whittington Hospital NHS Trust                           | RKE |          |     |            |
| 4  | Torbay and South Devon NHS Foundation Trust                  | RA9 | Yes (24) |     |            |
| 5  | Trafford Healthcare NHS Trust                                | RM4 | Yes (25) |     |            |
| 6  | United Lincolnshire Hospitals NHS Trust                      | RWD |          |     |            |
| 7  | University College London Hospitals NHS Foundation Trust     | RRV |          |     |            |
| 8  | University Hospital Of South Manchester NHS Foundation Trust | RM2 |          |     |            |
| 9  | University Hospital Southampton NHS Foundation Trust         | RHM |          | Yes | 01/10/2011 |
| 10 | University Hospitals Birmingham NHS Foundation Trust         | RRK |          |     |            |
| 11 | University Hospitals Bristol NHS Foundation Trust            | RA7 |          |     |            |
| 12 | University Hospitals Coventry and Warwickshire NHS Trust     | RKB |          |     |            |
| 13 | University Hospitals Of Leicester NHS Trust                  | RWE |          |     |            |
| 14 | University Hospitals Of Morecambe Bay NHS Foundation Trust   | RTX |          | Yes | 01/10/2010 |
| 15 | University Hospitals of North Midlands NHS Trust             | RJE | Yes (26) |     |            |
| 16 | Walsall Healthcare NHS Trust                                 | RBK |          |     |            |
| 17 | Warrington and Halton Hospitals NHS Foundation Trust         | RWW |          |     |            |
| 18 | West Hertfordshire Hospitals NHS Trust                       | RWG |          |     |            |
| 19 | West Middlesex University Hospital NHS Trust                 | RFW | Yes (27) |     |            |
| 20 | West Suffolk NHS Foundation Trust                            | RGR |          | Yes | 01/12/2011 |
| 21 | Western Sussex Hospitals NHS Foundation Trust                | RYR |          | Yes | 01/07/2013 |
| 22 | Weston Area Health NHS Trust                                 | RA3 |          |     |            |
| 23 | Whipps Cross University Hospital NHS Trust                   | RGC | Yes (28) |     |            |
| 24 | Winchester and Eastleigh Healthcare Trust                    | RN1 | Yes (29) |     |            |
| 25 | Wirral University Teaching Hospital NHS Foundation Trust     | RBL |          |     |            |
| 26 | Worcestershire Acute Hospitals NHS Trust                     | RWP |          |     |            |
| 27 | Wrightington, Wigan and Leigh NHS Foundation Trust           | RRF |          |     |            |
| 28 | Wye Valley NHS Trust                                         | RLQ | Yes (30) |     |            |
| 29 | Yeovil District Hospital NHS Foundation Trust                | RA4 |          |     |            |
| 30 | York Teaching Hospital NHS Foundation Trust                  | RCB | Yes (31) |     |            |

- 1
- 2 1. Acquired by Royal Free London NHS FT in 2014
- 3
- 4 2. Merged with Newham University Hospital NHS Trust and Whipps Cross University Hospital NHS Trust to form Barts Health NHS Trust in 2012
- 5
- 6 3. Formed from the merger of Barts and the London NHS Trust, Whipps Cross University Hospital NHS Trust and Newham University Hospital NHS
- 7 Trust in 2012
- 8
- 9 4. Acquired Trafford Healthcare NHS Trust in Apr 2012
- 10
- 11 5. Acquired West Middlesex University Hospital NHS Trust in Sep 2015
- 12
- 13 6. Merged with North West London Hospitals NHS Trust to form London North West Healthcare NHS Trust in 2014
- 14
- 15 7. Formed by merger of Heatherwood and Wexham Park Hospitals NHS FT and Frimley Park Hospital NHS FT on 1 October 2014
- 16
- 17 8. Formed by acquisition of Winchester and Eastleigh Healthcare Trust by Basingstoke and North Hampshire NHS FT in Jan 2012
- 18
- 19 9. Merged with Frimley Park Hospital NHS FT to form Frimley Health NHS FT on 1 October 2014
- 20
- 21 10. Created in Apr 2012 by a provider split from Isle of Wight NHS PCT (5QT)
- 22
- 23 11. Acquired Princess Royal University Hospital from South London NHS Healthcare Trust's dissolution in Oct 2013
- 24
- 25 12. Formed on 1 Oct 2013 by merger of merger of Lewisham Healthcare NHS Trust and Queen Elizabeth Hospital (previously part of South London
- 26 NHS Healthcare Trust)
- 27
- 28 13. Formed by merger of Ealing Hospital NHS Trust and North West London Hospitals NHS Trust in 2014
- 29
- 30 14. Mid Staffordshire NHS FT which ran Stafford hospital dissolved In Nov 2014. Stafford hospital renamed to County Hospital and acquired by newly
- 31 named University Hospitals of North Midlands NHS Trust
- 32
- 33 15. Merged with Barts and the London NHS Trust and Whipps Cross University Hospital NHS Trust to form Barts Health NHS Trust in 2012
- 34
- 35 16. Merged with Ealing Hospital NHS Trust to form London North West Healthcare NHS Trust in 2014
- 36
- 37 17. Formed from Oxford Radcliffe Hospitals NHS Trust by acquisition of Nuffield Orthopaedic Acute Centre NHS Trust in 2011
- 38
- 39 18. Acquired Barnet and Chase Farm Hospitals NHS Trust in 2014
- 40
- 41 19. Acquired by Royal United Hospital Bath NHS FT on 1 Feb 2015
- 42
- 43 20. Acquired Royal National Hospital For Rheumatic Diseases NHS FT on 1 Feb 2015
- 44
- 45 21. Acquired by York Teaching Hospital NHS Foundation Trust in Jul 2013
- 46 22. Dissolved in Oct 2013

- 1 23. Acquired Cannock Chase Hospital when Mid Staffordshire NHS FT dissolved In Nov 2014
- 2 24. Created on 1 Oct 2015 from South Devon Healthcare NHS Foundation Trust merging with Torbay and Southern Devon Health and Care NHS Trust
- 3 (community and social care services)
- 4
- 5 25. Acquired by Central Manchester University Hospitals NHS FT in Apr 2012
- 6
- 7 26. Formed from University Hospital Of North Staffordshire NHS Trust taking over Stafford Hospital (now named County Hospital) on 1 Nov 2014. Mid
- 8 Staffordshire NHS FT which ran Stafford hospital dissolved In Nov 2014
- 9
- 10 27. Acquired by Chelsea and Westminster Hospital NHS FT in Sep 2015
- 11
- 12 28. Merged with Newham University Hospital NHS Trust and Barts and the London NHS Trust to form Barts Health NHS Trust in 2012
- 13
- 14 29. Acquired by Basingstoke and North Hampshire NHS FT to form Hampshire Hospitals NHS FT in Jan 2012
- 15
- 16 30. Formed from Hereford Hospitals NHS Trust on 1 April 2011 following Herefordshire's health and adult social care providers joining to form an
- 17 integrated provider of acute, community and social care in England
- 18
- 19 31. Acquired Scarborough and North East Yorkshire Healthcare NHS Trust in Jul 2013
- 20
- 21
- 22
- 23
- 24
- 25
- 26
- 27
- 28
- 29
- 30
- 31
- 32
- 33
- 34
- 35
- 36
- 37
- 38
- 39
- 40
- 41
- 42
- 43
- 44
- 45
- 46



## SENSITIVITY ANALYSES AND ADDITIONAL TABLES

**Table A. Assessment of the impact of not adjusting for missing 2011 delayed transfer of care data.** Abbreviations: CI, confidence interval.

| Delayed transfers of care days per hospital bed | n   | Trust clusters | Coefficient | 95% CI         | p-value |
|-------------------------------------------------|-----|----------------|-------------|----------------|---------|
| Without adjustment for missing 2011 data        | 837 | 148            | -21.9       | -35.5 to -8.4  | 0.002   |
| With adjustment for missing 2011 data           | 837 | 148            | -25.1       | -39.1 to -11.0 | 0.001   |

**Table B. Association of operating margin with outcomes and process measures.** Adjusted regression analyses as per table 3 in the manuscript excluding Trusts that had changed in composition between 2011 and 2016. Abbreviations: A&E, Accident & Emergency; SHMI, Summary Hospital-level Mortality Indicator.

| Outcome                                         | n   | Trust clusters | Coefficient | 95% CI         | p-value |
|-------------------------------------------------|-----|----------------|-------------|----------------|---------|
| Readmission rate (%)                            | 344 | 119            | -0.01       | -0.03 to 0.01  | 0.403   |
| Inpatient satisfaction score (out of 10)        | 706 | 119            | 0.66        | -0.23 to 1.55  | 0.142   |
| A&E 4 hour breach rate (%)                      | 710 | 119            | -0.20       | -0.30 to -0.11 | <0.001  |
| Delayed transfers of care days per hospital bed | 711 | 119            | -29.5       | -44.1 to -14.8 | <0.001  |
| 2 week wait cancer target adherence (%)         | 710 | 119            | 0.05        | 0.00 to 0.10   | 0.042   |
| 62 day cancer treatment target adherence (%)    | 710 | 119            | 0.12        | 0.02 to 0.23   | 0.018   |

**Table C. Association of operating margin with outcomes and process measures (summary model for 2011-13).** Operating margin and outcomes were averaged over the 3 years from 2011-13 to form the inputs to the summary model. Readmission rate is not included as data was not available for 2011-13. Abbreviations: A&E, Accident & Emergency; CI, confidence interval.

| <b>Agency spend as a proportion of turnover (%)</b> |             |             |             |             |             |             |
|-----------------------------------------------------|-------------|-------------|-------------|-------------|-------------|-------------|
|                                                     | <b>2011</b> | <b>2012</b> | <b>2013</b> | <b>2014</b> | <b>2015</b> | <b>2016</b> |
| <b>Worst 10%</b>                                    | 3.9         | 3.9         | 4.6         | 6.0         | 8.5         | 9.1         |
| <b>Middle 80%</b>                                   | 2.4         | 2.3         | 2.6         | 3.0         | 4.6         | 5.1         |
| <b>Best 10%</b>                                     | 2.7         | 2.9         | 3.4         | 3.8         | 4.0         | 4.5         |
|                                                     |             |             |             |             |             |             |
| <b>Ratio of worst to best</b>                       | 1.4         | 1.3         | 1.4         | 1.6         | 2.1         | 2.0         |
| <b>Difference (best and worst)</b>                  | 1.2         | 1.0         | 1.2         | 2.2         | 4.5         | 4.6         |

1 PUTATIVE INTERPLAY OF FACTORS AFFECTING TRUST FINANCE AND PERFORMANCE

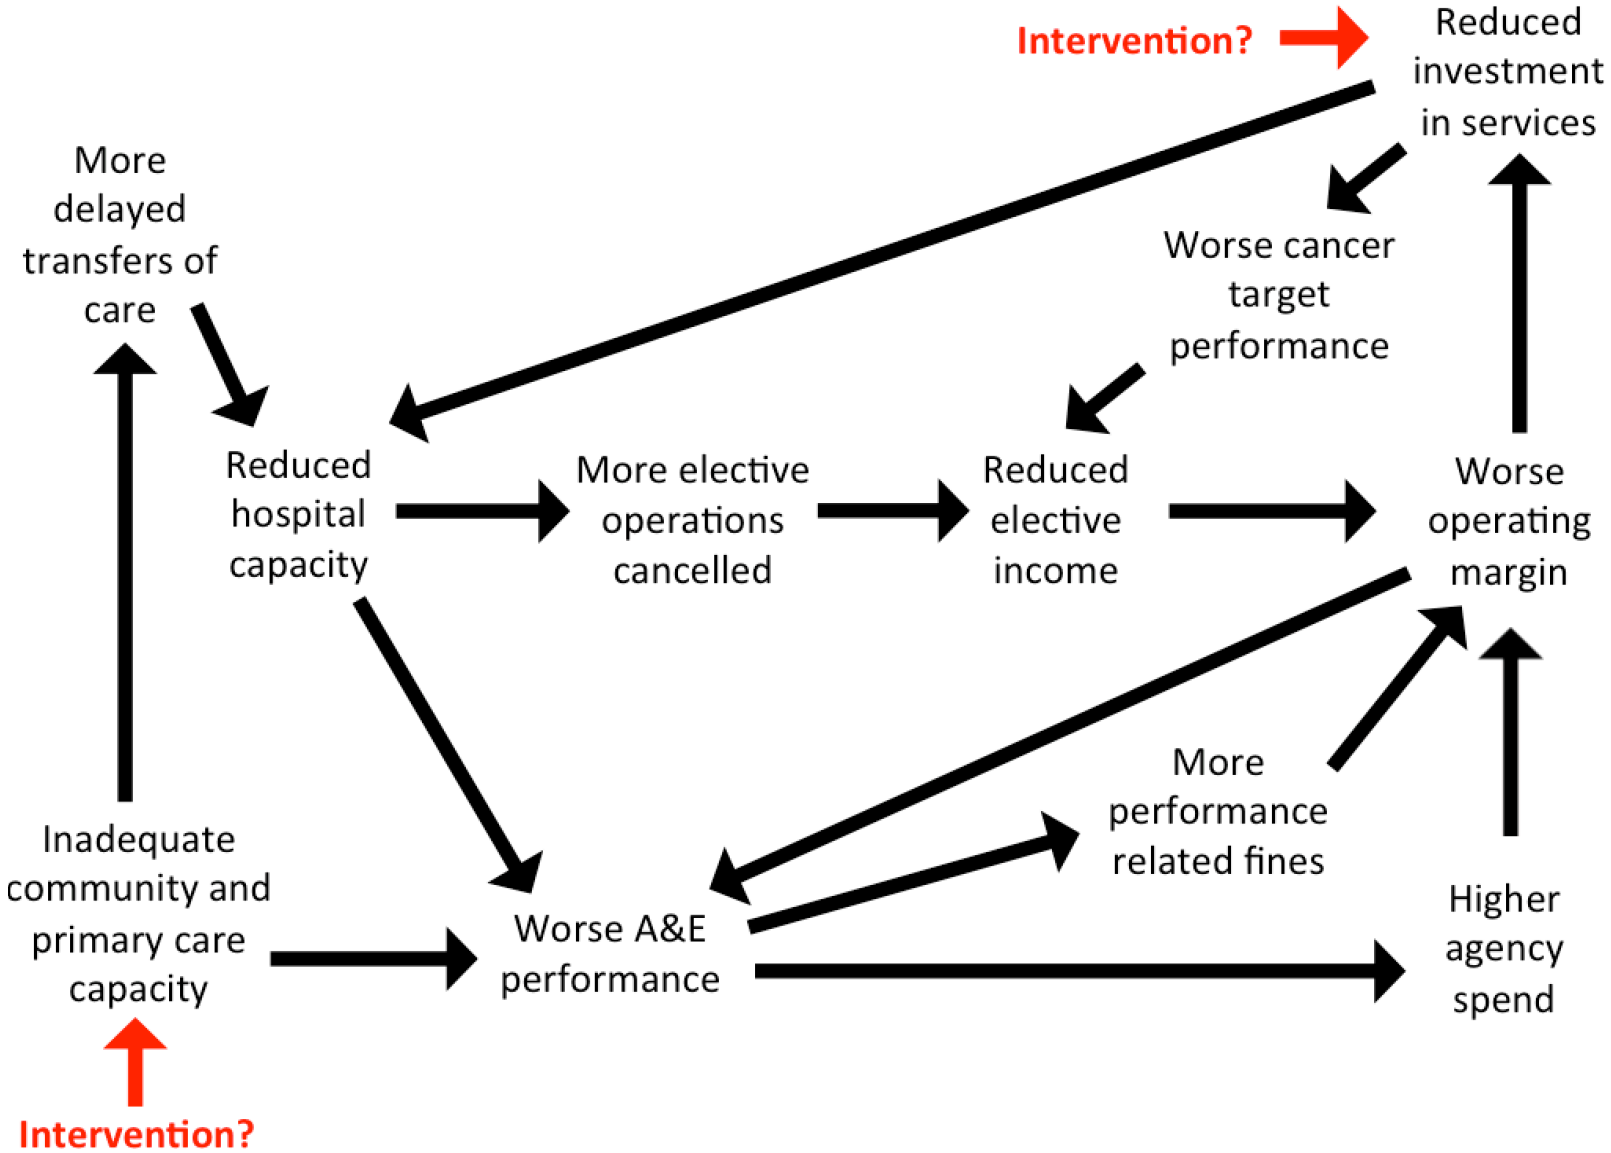

STROBE Statement—Checklist of items that should be included in reports of *cohort studies*

|                              | Item No | Recommendation                                                                                                                                                                                           |
|------------------------------|---------|----------------------------------------------------------------------------------------------------------------------------------------------------------------------------------------------------------|
| <b>Title and abstract</b>    | 1       | (a) Indicate the study's design with a commonly used term in the title or the abstract<br><b>PAGE 1</b>                                                                                                  |
|                              |         | (b) Provide in the abstract an informative and balanced summary of what was done and what was found<br><b>PAGE 2</b>                                                                                     |
| <b>Introduction</b>          |         |                                                                                                                                                                                                          |
| Background/rationale         | 2       | Explain the scientific background and rationale for the investigation being reported<br><b>PAGE 4</b>                                                                                                    |
| Objectives                   | 3       | State specific objectives, including any pre-specified hypotheses<br><b>PAGE 4</b>                                                                                                                       |
| <b>Methods</b>               |         |                                                                                                                                                                                                          |
| Study design                 | 4       | Present key elements of study design early in the paper<br><b>PAGES 5-7</b>                                                                                                                              |
| Setting                      | 5       | Describe the setting, locations, and relevant dates, including periods of recruitment, exposure, follow-up, and data collection<br><b>PAGES 5-7 (IN SO FAR AS APPLICABLE TO THIS STUDY)</b>              |
| Participants                 | 6       | (a) Give the eligibility criteria, and the sources and methods of selection of participants. Describe methods of follow-up<br><b>PAGE 5 (NO PARTICIPANTS, DESCRIBED FOR CENTRES)</b>                     |
|                              |         | (b) For matched studies, give matching criteria and number of exposed and unexposed<br><b>NOT APPLICABLE</b>                                                                                             |
| Variables                    | 7       | Clearly define all outcomes, exposures, predictors, potential confounders, and effect modifiers. Give diagnostic criteria, if applicable<br><b>PAGES 5-7</b>                                             |
| Data sources/<br>measurement | 8*      | For each variable of interest, give sources of data and details of methods of assessment (measurement). Describe comparability of assessment methods if there is more than one group<br><b>PAGES 5-7</b> |
| Bias                         | 9       | Describe any efforts to address potential sources of bias                                                                                                                                                |
| Study size                   | 10      | Explain how the study size was arrived at<br><b>PAGE 5</b>                                                                                                                                               |
| Quantitative variables       | 11      | Explain how quantitative variables were handled in the analyses. If applicable, describe which groupings were chosen and why                                                                             |
| Statistical methods          | 12      | (a) Describe all statistical methods, including those used to control for confounding<br><b>PAGES 7-8</b>                                                                                                |
|                              |         | (b) Describe any methods used to examine subgroups and interactions<br><b>PAGE 7</b>                                                                                                                     |
|                              |         | (c) Explain how missing data were addressed<br><b>PAGES 6-7</b>                                                                                                                                          |
|                              |         | (d) If applicable, explain how loss to follow-up was addressed<br><b>NOT APPLICABLE</b>                                                                                                                  |
|                              |         | (e) Describe any sensitivity analyses<br><b>PAGE 8</b>                                                                                                                                                   |

1  
2  
3  
4  
5  
6  
7  
8  
9  
10  
11  
12  
13  
14  
15  
16  
17  
18  
19  
20  
21  
22  
23  
24  
25  
26  
27  
28  
29  
30  
31  
32  
33  
34  
35  
36  
37  
38  
39  
40  
41  
42  
43  
44  
45  
46  
47  
48  
49  
50  
51  
52  
53  
54  
55  
56  
57  
58  
59  
60

| <b>Results</b>           |     |                                                                                                                                                                                                                                                                                                                                                                                                                                                                                                                        |
|--------------------------|-----|------------------------------------------------------------------------------------------------------------------------------------------------------------------------------------------------------------------------------------------------------------------------------------------------------------------------------------------------------------------------------------------------------------------------------------------------------------------------------------------------------------------------|
| Participants             | 13* | (a) Report numbers of individuals at each stage of study—eg numbers potentially eligible, examined for eligibility, confirmed eligible, included in the study, completing follow-up, and analysed<br><b>NOT APPLICABLE</b><br>(b) Give reasons for non-participation at each stage<br><b>NOT APPLICABLE BUT DETAILS GIVEN IN ONLINE APPENDIX REGARDING CHANGE IN COMPOSITION OF TRUSTS</b><br>(c) Consider use of a flow diagram<br><b>NOT APPLICABLE</b>                                                              |
| Descriptive data         | 14* | (a) Give characteristics of study participants (eg demographic, clinical, social) and information on exposures and potential confounders<br><b>NOT APPLICABLE BUT DETAILS FOR TRUSTS GIVEN ON PAGES 9 &amp; 24</b><br>(b) Indicate number of participants with missing data for each variable of interest<br><b>NOT APPLICABLE BUT DETAILS FOR TRUSTS GIVEN ON PAGE 5 IN METHODS SECTION</b><br>(c) Summarise follow-up time (eg, average and total amount)<br><b>NOT APPLICABLE AS FOLLOW-UP TIME IS STUDY-PERIOD</b> |
| Outcome data             | 15* | Report numbers of outcome events or summary measures over time<br><b>NOT APPLICABLE IN THE FORMAT OF NUMBER OF OUTCOME EVENTS</b>                                                                                                                                                                                                                                                                                                                                                                                      |
| Main results             | 16  | (a) Give unadjusted estimates and, if applicable, confounder-adjusted estimates and their precision (eg, 95% confidence interval). Make clear which confounders were adjusted for and why they were included<br><b>PAGES 9-11</b><br>(b) Report category boundaries when continuous variables were categorized<br><b>PAGES 9-11</b><br>(c) If relevant, consider translating estimates of relative risk into absolute risk for a meaningful time period<br><b>NOT APPLICABLE</b>                                       |
| Other analyses           | 17  | Report other analyses done—eg analyses of subgroups and interactions, and sensitivity analyses<br><b>PAGE 11 AND ONLINE APPENDIX</b>                                                                                                                                                                                                                                                                                                                                                                                   |
| <b>Discussion</b>        |     |                                                                                                                                                                                                                                                                                                                                                                                                                                                                                                                        |
| Key results              | 18  | Summarise key results with reference to study objectives<br><b>PAGE 11</b>                                                                                                                                                                                                                                                                                                                                                                                                                                             |
| Limitations              | 19  | Discuss limitations of the study, taking into account sources of potential bias or imprecision. Discuss both direction and magnitude of any potential bias<br><b>PAGES 13-14</b>                                                                                                                                                                                                                                                                                                                                       |
| Interpretation           | 20  | Give a cautious overall interpretation of results considering objectives, limitations, multiplicity of analyses, results from similar studies, and other relevant evidence<br><b>PAGES 14-16</b>                                                                                                                                                                                                                                                                                                                       |
| Generalisability         | 21  | Discuss the generalisability (external validity) of the study results<br><b>PAGES 14-16</b>                                                                                                                                                                                                                                                                                                                                                                                                                            |
| <b>Other information</b> |     |                                                                                                                                                                                                                                                                                                                                                                                                                                                                                                                        |
| Funding                  | 22  | Give the source of funding and the role of the funders for the present study and, if applicable, for the original study on which the present article is based                                                                                                                                                                                                                                                                                                                                                          |

\*Give information separately for exposed and unexposed groups.

**Note:** An Explanation and Elaboration article discusses each checklist item and gives methodological background and published examples of transparent reporting. The STROBE checklist is best used in conjunction with this article (freely available on the Web sites of PLoS Medicine at <http://www.plosmedicine.org/>, Annals of Internal Medicine at <http://www.annals.org/>, and Epidemiology at <http://www.epidem.com/>). Information on the STROBE Initiative is available at <http://www.strobe-statement.org>.

For peer review only

# BMJ Open

## Financial Performance of English NHS Trusts and Variation in Clinical Outcomes: A Longitudinal Observational Study

|                                 |                                                                                                                                                                                                                                                                                                                                                                                                                   |
|---------------------------------|-------------------------------------------------------------------------------------------------------------------------------------------------------------------------------------------------------------------------------------------------------------------------------------------------------------------------------------------------------------------------------------------------------------------|
| Journal:                        | <i>BMJ Open</i>                                                                                                                                                                                                                                                                                                                                                                                                   |
| Manuscript ID                   | bmjopen-2018-021854.R2                                                                                                                                                                                                                                                                                                                                                                                            |
| Article Type:                   | Research                                                                                                                                                                                                                                                                                                                                                                                                          |
| Date Submitted by the Author:   | 04-Oct-2018                                                                                                                                                                                                                                                                                                                                                                                                       |
| Complete List of Authors:       | Nagendran, Myura; Imperial College London, Division of Anaesthetics, Pain Medicine and Intensive Care<br>Kiew, Grace; North West Anglia NHS Foundation Trust<br>Raine, Rosalind; University College London, Department of Applied Health Care<br>Atun, Rifat; Harvard University, Harvard School of Public Health<br>Maruthappu, Mahiben; University College London, Department of Epidemiology and Public Health |
| <b>Primary Subject Heading</b>: | Health services research                                                                                                                                                                                                                                                                                                                                                                                          |
| Secondary Subject Heading:      | Health economics, Health policy                                                                                                                                                                                                                                                                                                                                                                                   |
| Keywords:                       | hospital, finance, outcomes, process measures                                                                                                                                                                                                                                                                                                                                                                     |
|                                 |                                                                                                                                                                                                                                                                                                                                                                                                                   |

SCHOLARONE™  
Manuscripts

# Financial Performance of English NHS Trusts and Variation in Clinical Outcomes: A Longitudinal Observational Study

Myura Nagendran, MRCP, FRCA<sup>1</sup>

Grace Kiew, MB BChir<sup>2</sup>

Rosalind Raine, PhD<sup>3</sup>

Rifat Atun, FRCP<sup>4</sup>

Mahiben Maruthappu, BM BCh<sup>5</sup>

1. Academic Clinical Fellow, Division of Anaesthetics, Pain Medicine and Intensive Care, Imperial College London, UK
2. Foundation Doctor, North West Anglia NHS Foundation Trust, Peterborough, UK
3. Professor, Department of Applied Health Care, University College London, UK
4. Professor, Harvard T.H. Chan School of Public Health, Harvard University, Boston, MA, USA
5. Public Health Registrar, Department of Epidemiology and Public Health, University College London, UK

**Manuscript version:** 3.7

**Date of version:** 4 October 2018

**Corresponding author:** Dr. Mahiben Maruthappu  
Academic Clinical Fellow in Public Health  
Department of Epidemiology and Public Health  
University College London, UK

**E-mail:** [mahiben.maruthappu@nhs.net](mailto:mahiben.maruthappu@nhs.net)

**Phone:** + 44 7535 184 912



## ABSTRACT

### Objectives

To examine the association between financial performance as measured by operating margin (surplus/deficit as a proportion of turnover) and clinical outcomes in English NHS trusts.

### Setting

Longitudinal, observational study in 149 acute NHS trusts in England between the financial years 2011 and 2016.

### Participants

Our analysis focused on the outcomes at individual NHS Trust-level (composed of one or more acute hospitals).

### Primary and secondary outcomes

Outcome measures included readmissions, inpatient satisfaction score and the following process measures: emergency department (A&E) waiting time targets, cancer referral and treatment targets, and delayed transfers of care.

### Results

There was a progressive increase in the proportion of trusts in financial deficit: 22% in 2011, 27% in 2012, 28% in 2013, 51% in 2014, 68% in 2015 and 91% in 2016. In linear regression analyses, there was no significant association between operating margin and clinical outcomes (readmission rate or inpatient satisfaction score). There was, however, a significant association between operating margin and process measures (delayed transfers of care, A&E breaches and cancer waiting time targets). Between the best and worst financially performing Trusts, there was an approximately 2-fold increase in A&E breaches and delayed transfers of care overall although this variation decreased over the six years. Between the best and worst performing trusts on cancer targets, the magnitude of difference was smaller (1·16 and 1·15-fold), although the variation slowly rose during the six years.

### Conclusions

Operating margins in English NHS trusts progressively worsened during 2011-16, and this change was associated with poorer performance on several process measures but not with hospital readmissions or inpatient satisfaction. Significant variation exists between the best and worst financially performing Trusts. Further research is needed to examine the causal nature of relationships between financial performance, process measures and outcomes.

**STRENGTHS AND LIMITATIONS**

- To our knowledge, one of the first empirical exploratory analyses of the relationship between funding and outcomes in the English NHS
- Operating margin may not be the ideal measure of an organisation's financial position
- The proportion of activity at each Trust which is elective, acute or specialised was not taken into account nor was the percentage of activity subject to a national tariff
- There may be additional unmeasured confounders that have impacted the results
- This observational study is limited to demonstrating associations rather than causal links

## INTRODUCTION

The combination of higher demand due to ageing, growing populations, with more chronic illness and disability, in addition to rising treatment and technology costs, is driving increased health spending in high-income countries.<sup>1</sup> The National Health Service (NHS) in England is introducing policies to address these demands, attempting to contain costs while improving health outcomes. The NHS Five Year Forward View, published in October 2014, set out a strategic vision for sustaining a high-quality, comprehensive health system in England.<sup>2</sup> Specifically, it identified a £22 billion funding gap by 2020/21, based on the current funding trajectory of the NHS, to be met by ambitious efficiency savings of 2-3% annually (given a long-term track-record of 1% each year).

The call for increased efficiency comes in an austere climate, in which individual NHS Trusts are progressively challenged to achieve financial control,<sup>3,4</sup> while responding to high demand, especially in winter months, reported widely in the British media.<sup>5</sup> NHS Improvement, the body responsible for overseeing Trust performance, reported an overall third quarter deficit of £886 million for the 2016-17 financial year, £300 million higher than the planned target.<sup>6</sup> Higher demand for services, with rising emergency attendances and admissions, and delayed transfers of care (DTOCs), have been cited as key reasons for increasing deficit.<sup>7</sup> While control of Trust financial deficits is important for sustainability of the NHS, there are concerns on the adverse impact of worsening financial performance on clinical outcomes and processes,<sup>8</sup> but few studies which have explored this relationship.

We investigated the relationship between operating margin (surplus/deficit as a proportion of turnover) at English NHS Trusts during 2011-16, with outcomes and process measures. We selected performance measures that are commonly used for benchmarking performance of NHS Trusts and that could plausibly be related to quality, namely, hospital readmissions, inpatient satisfaction scores, emergency department waiting time targets, cancer referral and treatment targets, and delayed transfers of care.<sup>9</sup> Lastly, we investigated the variation in outcome and process measures between the financially best and worst performing Trusts, both overall and over time.

## METHODS

### Data sources and extraction

NHS Hospitals in England are categorised into financially and operationally distinct legal entities known as Trusts, which deliver services on behalf of the NHS. Trusts may be located at multiple sites and can be responsible for one or more hospitals. Well-performing Trusts are able to gain Foundation status, which allows a degree of financial and operational autonomy from the Department of Health. Data was sought for acute NHS Trusts in the 6-year period encompassing the financial years from April 2010 to March 2016.

We obtained financial data for Trusts from the gov.uk open data portal.<sup>10</sup> Where information was lacking for specific Trusts, we sought the original data from the published accounts available on individual Trust websites or from NHS 'The Quarter' reports.<sup>11</sup>

Data on four financial metrics were extracted and examined: first, the retained surplus/deficit for the financial year; second, the turnover for the Trust (calculated as "Revenue from patient care activities" and "Other operating revenue"); third, trust spend on agency staff, and fourth, spend on consultancy. The precise table IDs and sub-codes for extraction are detailed in the online Supplementary Appendix. Only the first two metrics are measures of financial performance. The second two reflect Trust spending choices and we included these as exploratory variables given the public and media interest in rising agency and consultancy spend.

Bed availability for the quarter preceding the end of each financial year was obtained from publicly available NHS England data<sup>12</sup> with occupancy rate calculated as the percentage of beds (as a proportion of total available) occupied on average during that quarter. Teaching status of the trusts was defined dichotomously on the basis of membership of The Association of UK University Hospitals.<sup>13</sup> For each NHS Trust, the postcode of the Trust was extracted and used as a proxy for location to calculate the region of the country in which the trust hospitals were located.

1 This postcode data were matched to the 2015 Indices of Multiple Deprivation (IMD) score.<sup>14</sup> The Office  
2 for National Statistics uses UK census data to generate the IMD score which encompasses census  
3 information from the following domains: income, employment, crime, living environment, health  
4 deprivation and disability, education and skills/training, barriers to housing and services.  
5  
6  
7  
8  
9

10 Using publicly available NHS England datasets, we obtained data on hospital activity in the form of  
11 number of annual admissions per Trust and annual outpatient attendances.<sup>15</sup> Data on last-minute  
12 elective operation cancellations (for non-clinical reasons) and the number of such patients not being  
13 treated within 28 days of such a cancellation were also extracted from publicly available NHS England  
14 datasets.<sup>15</sup>  
15  
16  
17  
18  
19

### 20 **Outcome measures**

21 The outcomes we measured consisted of two clinical measures and three process measures that are  
22 commonly used for benchmarking NHS Trusts and have plausible mechanisms for a relation to quality.  
23 We openly acknowledge that there are several other outcomes and process measures which may also  
24 relate to quality and could have been chosen. Our selection was based on a combination of logistical  
25 constraints (i.e. what data was publicly available) and an effort to include measures which are commonly  
26 used for benchmarking trusts and thereby also reported in the mainstream media.<sup>9</sup>  
27  
28  
29  
30  
31  
32  
33  
34  
35  
36  
37

38 The clinical measures were (i) the proportion of discharges readmitted as an emergency within 7 days of  
39 discharge and (ii) annual overall patient satisfaction for each trust using data from the National Adult  
40 Inpatient Survey compiled by the Care Quality Commission.<sup>16</sup> Data on readmissions was only available  
41 for the years 2014-16. The three process measures were: (i) Accident and Emergency (A&E) 4-hour  
42 waiting time breaches (ii) delayed transfers of care from an acute Trust, and (iii) cancer waiting time  
43 targets.  
44  
45  
46  
47  
48  
49  
50

51 The first process measure, Accident and Emergency (A&E) 4-hour waiting time breaches, was defined  
52 as the percentage of patient attendances in type 1 departments (major A&E) who waited greater than  
53 four hours from arrival to admission, transfer or discharge.  
54  
55  
56  
57  
58  
59

1  
2  
3 The second process measure, a delayed transfer of care from an acute Trust, was said to occur when a  
4 patient was ready to depart from acute care but was still occupying a bed. These data were extracted as  
5 'total number of bed days attributed to delayed transfers of care' and standardised to number of beds  
6 available in the Trust. Delayed transfer of care data were only available for the latter eight months of the  
7 2011 financial year. To ensure comparability with other years, a 1.5x multiplier was applied for each trust  
8 in this financial year (see online Supplementary Appendix for further details). No other missing data in  
9 the study was imputed.  
10  
11  
12  
13  
14  
15  
16  
17

18 For the third process measure, cancer waiting time targets, we assessed two specific targets (a) the  
19 proportion of patients who received a first consultant appointment within two weeks of urgent referral for  
20 suspected cancer by their General Practitioner (GP) and (b) the proportion of patients who commenced  
21 a first treatment for cancer within 62 days of being urgently referred by their GP.  
22  
23  
24  
25  
26  
27

### 28 **Unit of analysis**

29  
30 Our analysis focused on the outcomes at individual NHS Trust-level (composed of one or more acute  
31 hospitals).  
32  
33  
34  
35

### 36 **Statistical analysis**

37  
38 Our financial metric of interest was the annual Trust operating margin. Similarly to prior literature,<sup>17-19</sup> we  
39 defined operating margin as the retained surplus (or deficit) for the Trust in a financial year divided by the  
40 turnover (turnover being calculated as "Revenue from patient care activities" and "Other operating  
41 revenue"). This value was winsorised to set all outliers beyond the 2.5<sup>th</sup> and 97.5<sup>th</sup> percentiles to the  
42 values at these percentiles. We first calculated summary statistics of the operating surplus/deficit and  
43 metrics of trust characteristics, breaking the sample into 4 groups of deciles by Trust margin.  
44  
45  
46  
47  
48  
49  
50  
51

52 As a second step, we compared the variation in process and outcome measures between the financially  
53 best and worst performing trusts as categorised by operating margin decile (highest versus lowest).  
54  
55

56 Third, we performed multiple linear regression with our outcomes as the dependent variable and the  
57  
58  
59  
60

1 following independent variables: operating margin, number of beds available and year. Each Trust in  
2 each year was treated as a separate observation with standard errors clustered by Trust to account for  
3 the non-independence of Trust-level data.  
4  
5  
6  
7

8 Fourth, we compared outcomes and process measures between 'struggling' and 'non-struggling' Trusts.  
9 For this purpose, a struggling Trust was defined as either: (i) in financial or quality special measures as  
10 of December 2016 or (ii) a Foundation Trust subject to enforcement actions by Monitor as of September  
11 2016. Fifth, we investigated the relationships between delayed transfers of care, cancelled elective  
12 operations, agency spend, A&E breaches and operating margin by assessing correlation between these  
13 variables over an early period (2011-12) and a late period (2015-16).  
14  
15  
16  
17  
18  
19  
20  
21

22 We performed sensitivity analyses to assess the impact of (i) adjustment for missing 2011 delayed  
23 transfer of care data and (ii) inclusion of Trusts that had changed in composition during the study period.  
24  
25  
26  
27

28 All reported  $p$ -values are two sided with the statistical significance threshold set to a  $p$ -value of less than  
29 0.05. Given the hypothesis generating nature of this study, no corrections were made for multiple  
30 comparisons. Approximately 1 in every 20 comparisons could be expected to achieve statistical  
31 significance by chance alone. All analyses were performed using STATA statistical software version 12.1  
32 (College Station, TX). This study had no external funding source.  
33  
34  
35  
36  
37  
38  
39

#### 40 **Patient involvement**

41 Patients were not involved in any aspect of the study design, conduct or in the development of the  
42 research question or outcome measures. This study was a retrospective longitudinal observational study  
43 of publicly available Trust-level data and therefore there was no active patient recruitment for data  
44 collection or requirement for ethical approval.  
45  
46  
47  
48  
49  
50  
51  
52  
53  
54  
55  
56  
57  
58  
59  
60

## RESULTS

Over the 6-year period of study, encompassing the financial years from April 2010 to March 2016, there were changes in the composition to 31 of 149 Trusts. These are detailed in the online Supplementary Appendix and took the form of creation of a new Trust, dissolution of an existing Trust, acquisitions of a hospital or entire Trust to another Trust and mergers between Trusts. 13 Trusts (9%) transitioned to Foundation Status during the 6-year study period. Of the remaining 136 Trusts, 63 (42%) were non Foundation Trusts and 73 (49%) were Foundation Trusts.

There was a progressive increase in the proportion of Trusts in deficit over the 6-year study period: 22% in 2011, 27% in 2012, 28% in 2013, 51% in 2014, 68% in 2015 and 91% in 2016. The distribution of average operating surplus/deficit over the study period is displayed in Figure 1. Operating surplus/deficit varied widely across Trusts ranging from -£250 million to £181 million over the six years. Median operating surplus/deficit over the study period was -£3.8 million (IQR -£8.7 million to -£0.7 million, range -£63.1 million to £32.6 million). Median operating margin over the study period was -1.1% (IQR -2.7% to -0.2%, range -42.5% to 4.6%). Median operating margin was higher in teaching Trusts compared to non-Teaching Trusts (-0.5% versus -1.4%,  $p=0.002$ ) and lowest in the Midlands compared to other regions (-2.3% in the Midlands, -1.2% in London, -0.8% in the South, -1.0% in the North;  $p=0.028$ ).

During the 6-year study period, there was a nationwide decline in overnight general and acute beds from 110,568 to 103,422 (6.5% reduction) with a concomitant increase in day only beds from 11,572 to 12,207 (5.5% increase).

Trust metrics are shown in Table 1 stratified by decile of operating margin. Between the best and worst financially performing Trusts, there was an approximately 1.75-fold and 2-fold increase in agency and consultancy spend respectively as a proportion of turnover. The best financially performing Trusts also had a 1.5-fold higher annual number of outpatient attendances. In contrast, the annual number of admissions, bed occupancy rates and local deprivation scores were broadly similar between the best and worst performing Trusts. The proportion of Trusts with teaching status increased throughout deciles



1 of operating margin. Trends in the variation of operating margin over time with clinical outcomes and  
2 process measures are displayed in figures 2 and 3 respectively.  
3  
4  
5

6 Clinical outcomes and process measures, stratified by decile of operating margin, are shown in table 2.  
7  
8 Between the best and worst financially performing Trusts, there was an approximately 2-fold increase in  
9 A&E breach rates and delayed transfers of care. In contrast, despite significant differences between the  
10 best and worst performing trusts on cancer targets, the magnitude of difference was much smaller (both  
11 approximately 1·15-fold).  
12  
13  
14  
15

16  
17  
18 Trends in the variation between the best and worst financially performing Trusts over time for both  
19 clinical outcomes and process measures are shown in table 3. There was no appreciable variation in  
20 readmission rate or inpatient satisfaction score with the latter increasing over time at a slightly faster rate  
21 in the worst financially performing Trusts.  
22  
23  
24  
25

26  
27  
28 Performance on process measures in both the best and worst financially performing Trusts deteriorated  
29 over time (table 3). However, variation between the best and worst groups narrowed for A&E breaches,  
30 returned to baseline for delayed transfers of care after an initial rise, and rose slowly for both cancer  
31 target breaches. The variation in agency spend as a proportion of turnover between the best and worst  
32 financially performing trusts increased substantially between 2011 (best 2·7% and worst 3·9%,  
33 difference 1·2%) and 2016 (best 4·5% and worst 9·1%, difference 4·6%) (see online Supplementary  
34 Appendix for further details).  
35  
36  
37  
38  
39  
40  
41

42  
43  
44 In our linear regression analyses, there was no significant association between operating margin and  
45 clinical outcomes (readmission rate or inpatient satisfaction score; table 4). There was, however, a  
46 significant association between operating margin and process measures (delayed transfers of care, A&E  
47 breaches and cancer waiting time targets; table 4). Trusts defined as struggling (i.e. in special measures  
48 or subject to enforcement action) were associated with worse performance on all process measures but  
49 not with readmission rate or inpatient satisfaction scores (table 5).  
50  
51  
52  
53  
54  
55  
56  
57  
58  
59  
60

1 The associations between delayed transfers of care, elective surgery cancellations, agency spend, A&E  
2 breaches and operating margins are displayed in a correlation matrix for the early years (2011 and 2012;  
3 figure 4) and the later years (2015 and 2016; figure 5) of the six year study period (same scale applied to  
4 figure 4) and the later years (2015 and 2016; figure 5) of the six year study period (same scale applied to  
5 both figures 4 and 5). There was weak positive correlation between all factors except operating margin  
6 for which there was weak negative correlation with the other measures. These associations were  
7 maintained in the later years though with a greater spread among trusts.  
8  
9  
10  
11  
12  
13

14 Sensitivity analyses are reported in the online Supplementary Appendix. There was no change to the  
15 results with and without adjustment for missing 2011 delayed transfer of care data. There was no change  
16 to the results when excluding Trusts that had changed in composition over the study period.  
17  
18  
19  
20  
21  
22  
23  
24  
25  
26  
27  
28  
29  
30  
31  
32  
33  
34  
35  
36  
37  
38  
39  
40  
41  
42  
43  
44  
45  
46  
47  
48  
49  
50  
51  
52  
53  
54  
55  
56  
57  
58  
59  
60

## DISCUSSION

### Principal findings

Our study has a number of important findings. First, in the period 2011-16, there was a substantial increase in the proportion of NHS Trusts with negative operating margins. Second, the overall variation between the best and worst financially performing Trusts was larger for A&E breach rates and delayed transfers of care than for cancer targets. Third, the variation over time between the best and worst financially performing trusts was static for clinical outcomes and mixed for process measures (decreased over the six years for A&E breaches, was static for delayed transfers of care while increasing slightly for cancer targets). Fourth, there was a significant association between worsened operating margin and deteriorating process measures (four-hour A&E targets, cancer waiting time targets and delayed transfers of care), but not between operating margin and either readmission rates or inpatient satisfaction scores.

### Comparison with other studies

The extant literature on the association between financial performance and outcomes comes primarily from the United States (US) and is mixed in pronouncement. Volpp and colleagues assessed the impact of a budget act reducing Medicare reimbursements on processes of care for acute myocardial infarction (MI).<sup>20</sup> They found that while the budget act added moderate financial strain to organisations, there was no appreciable worsening of care with respect to MI processes of care or mortality in 236,506 patients from 208 hospitals. An analysis by Bazzoli and colleagues in 2008 concluded that while there may be an association between some measures of financial performance and adverse events, it was much weaker than previously reported by Encinosa and Bernard who found a concerning association between frequency of patient safety alerts and operating margin.<sup>17,18</sup> Further, a study by Ly and colleagues in over 3,000 US hospitals found that low hospital margins were associated with worse processes of care and higher readmissions, although not with higher mortality.<sup>21</sup>

Placing our findings in the context of earlier studies requires extreme caution given the differences between the US and UK health systems. Specifically, Ly et al. excluded public hospitals (which comprise

1 the vast majority of English hospitals) from their analysis. However, these prior studies do highlight the  
2 difficulty in disentangling the relationship between financial performance and outcomes. Meanwhile, a  
3 large European cohort study revealed that attempts to save money by cutting nurse to patient ratios may  
4 adversely affect patient outcomes.<sup>22</sup> An increase in a nurses' workload by one patient increased the  
5 likelihood of a 30-day inpatient death by 7% (odds ratio 1.07, 95% CI 1.03 to 1.11).<sup>22</sup>  
6  
7  
8  
9

### 10 11 12 **Study limitations**

13 Our findings must be borne in light of several study limitations. First, while we had access to a  
14 considerable volume of data, the granularity of data was limited. For example, our unit of analysis was at  
15 the Trust level, giving a sample size of approximately 149 compared to equivalent US studies that have  
16 analysed over 3000 hospitals.<sup>21</sup> Lack of 'high-frequency' data also prevented us performing interrupted  
17 time-series and time-lag analyses.  
18  
19  
20  
21  
22  
23

24  
25  
26 Second, it may be that operating margin is not the ideal measure of an organisation's financial position.  
27 A Trust's deficit may be exaggerated if it realises that a deficit is unavoidable and careful accounting  
28 allows for a larger than necessary deficit in one year to ensure a small surplus in the following year (as  
29 opposed to two years of deficit); potential gamification.<sup>23</sup> Organisations including NHS Improvement and  
30 the Department of Health typically use breakeven performance figures instead of operating  
31 surplus/deficits. We chose not to use such figures as the data were not easily available at Trust level for  
32 much of the period under investigation.  
33  
34  
35  
36  
37  
38  
39  
40

41  
42 Third, we utilised only a small selection of existing clinical outcomes and process. This decision was  
43 driven by two factors. Logistically, there is limited public access to many clinical outcomes. While there is  
44 access to many process measures, we opted for a small selection that is commonly used for  
45 benchmarking trusts (i.e. often quoted in media reports and receive major public scrutiny) so as to avoid  
46 the issues of multiple comparisons. It is entirely possible that other process measures may well display  
47 differing relationships with respect to operating margins.  
48  
49  
50  
51  
52  
53  
54  
55  
56  
57  
58  
59  
60

1 Fourth, we did not take into account the proportion of activity at each Trust which is elective, acute or  
2 specialised nor did we assess the percentage of activity subject to a national tariff. Work from the Health  
3 Foundation in 2016 suggests a link between financial performance and the proportion of Trust income  
4 arising from activities subject to the national tariff.<sup>24</sup> Reimbursement prices for specialist activity tend to  
5 be higher than average treatment costs. Furthermore, best practice tariffs tend to reward more efficient  
6 treatment delivery such as an increased proportion of day cases. Although there is likely to be correlation  
7 between teaching hospital status (which we did assess) and the share of activity subject to a specialised  
8 services tariff, this is nonetheless a crude proxy.  
9

10  
11  
12  
13  
14  
15  
16  
17  
18 Fifth, there may be additional unmeasured confounders that have impacted on our results. For example,  
19 surrounding Primary Care systems may impact on the efficiency with which the acute Trusts function. Or  
20 alternatively, competition from independent sector treatment centres (ISTCs) may lead to a loss of  
21 revenue and market share for some Trusts, who may then need to invest more of their operating funds in  
22 attracting patients, especially given an increasing emphasis on patient choice and the freedom for  
23 patients to select hospitals by publicly reported outcomes. We adjusted for hospital size in the form of  
24 number of beds as well as using operating margin as a more standardised measure of financial  
25 performance than gross surplus or deficit (as turnover showed wide variation between trusts). Trusts that  
26 treat greater volumes of patients may benefit from economies of scale. However, as with any  
27 observational research, we cannot fully discount the impact of confounding on our results. For example,  
28 financial underperformance may be a signal of general underperformance in a Trust where clinical and  
29 other functions that might be suboptimal affect outcomes. Sixth, we are limited to demonstrating  
30 associations rather than causal links.  
31  
32  
33  
34  
35  
36  
37  
38  
39  
40  
41  
42  
43  
44  
45

## 46 **Conclusions and policy implications**

47  
48 Notwithstanding limitations, our findings have important ramifications for clinical leads, managers and  
49 policy makers. The relationship between financial performance and clinical outcomes is far more  
50 complex and associated with myriad other factors which will vary among Trusts. This is highlighted in a  
51 2017 briefing from the Nuffield Trust which discusses the current financial health of Trusts and attempts  
52 to predict what is likely to occur in the coming years.<sup>23</sup> Trusts with financial deficits may be spending  
53  
54  
55  
56  
57  
58  
59

1 more than they can afford (for example, on extra nursing staff) and one could therefore argue that higher  
2 quality should be expected for this extra financial outlay. Conversely, the existence of such deficit might  
3 instead indicate reduced efficiency and challenged management. Alternatively, financial penalties due to  
4 poor clinical performance or financial management could exacerbate deficits. For example, marginal rate  
5 payment reductions for emergency admissions, penalties for readmissions and withholding payment for  
6 cases resulting in never events. Attempts to redress this balance may inadvertently lead to reflex  
7 spending cuts and poorer quality care. The role of clinical leads, management and leadership within a  
8 Trust is likely to be a key contributor to how financial deficits impact quality of care. For example, cutting  
9 down on management personnel to save costs may result in worse productivity if clinicians have to  
10 allocate more time to administrative activities and away from revenue producing clinical activities.

11  
12  
13  
14  
15  
16  
17  
18  
19  
20  
21  
22 There are a number of specific points to consider also. First, there is substantial variation between  
23 Trusts, which in some cases is worsening. Between the best and worst financially performing Trusts,  
24 there are up-to 2-fold differences in agency spend, delayed transfers of care, A&E breaches and cancer  
25 waiting times. This is notable and needs to be explicitly tackled with greater efficacy. While national  
26 regulators such as the Care Quality Commission (CQC) and NHS Improvement do seek to support  
27 challenged Trusts, the effectiveness of this has not necessarily translated into improved performance  
28 metrics. An argument could also be made that although the magnitude of difference in cancer targets  
29 was smaller than for A&E breaches, there may be greater concern from even small increases in cancer  
30 waiting times compared to A&E breaches which include less severe illnesses.

31  
32  
33  
34  
35  
36  
37  
38  
39  
40  
41  
42 Second, the lack of significant association between operating margin and either readmissions or  
43 inpatient satisfaction may suggest that clinical outcomes are more resilient to financial pressures than  
44 process measures, or that the driver for such clinical metrics is not predominantly financial-based. Third,  
45 the recent narrowing of variation between the best and worst performing Trusts on the measures of A&E  
46 targets and delayed transfers of care, may be a cause for concern, suggesting that now even the best  
47 financially performing Trusts are struggling to manage demand. This indicates that a more system-wide  
48 approach to demand-management and improving Trust performance may be required to address the  
49 identified deteriorations, given the entire Trust cohort is now showing signs of deterioration. Stated

1 plainly, it seems that even if best practice is adopted from the most well managed Trusts, demands on  
2 secondary and tertiary care may not be adequately addressed.  
3  
4  
5

6 Finally, our inability to demonstrate causal links on the available macro level public data re-emphasises  
7 the need for higher quality interventional studies such as cluster randomised trials specifically assessing  
8 policy impacts before implementation en masse. Furthermore, studies assessing the micro level  
9 spending decisions by Trusts when confronted by financial pressures may also lend more insight into the  
10 causal pathway and suggest appropriate targets for intervention.  
11  
12  
13  
14  
15  
16  
17

### 18 **Summary**

19 Notwithstanding limitations, our results demonstrate that operating margins at English NHS Trusts have  
20 progressively worsened over 2011-16, and that this change correlates with poorer Trust performance on  
21 a range of widely benchmarked process measures, but not significantly with readmissions or inpatient  
22 satisfaction. The variation between the best and worst financially performing Trusts was larger for A&E  
23 breach rates and delayed transfers of care than for cancer targets but showed differing patterns of  
24 variation over time. The causal nature of relationships between financial performance, process measures  
25 and outcomes remains difficult to disentangle.  
26  
27  
28  
29  
30  
31  
32  
33  
34  
35  
36  
37  
38  
39  
40  
41  
42  
43  
44  
45  
46  
47  
48  
49  
50  
51  
52  
53  
54  
55  
56  
57  
58  
59  
60

## RESEARCH IN CONTEXT

### Evidence before this study

We searched the scientific literature to identify original research articles assessing the macro-level association between financial performance and outcomes in the NHS and how such outcomes vary between the best and worst financially performing Trusts. We searched PubMed for manuscripts published in any language up to and including August 15<sup>th</sup> 2017, using the following search terms: ("NHS"[Ti] OR "National health service"[Ti] OR ("English"[Ti] AND "Hospital"[Tiab])) AND ("Variation"[Tiab] or "Outcome"[Tiab]). 550 records were retrieved but none were deemed includable.

### Added value of this study

Most of the extant literature comes from the United States and direct comparison is fraught with difficulty. Our study is the largest analysis to date of the association between financial performance, as measured by operating margin, and outcomes at English NHS Trusts. Operating margins in English NHS trusts progressively worsened during 2011-16, and this change was associated with poorer performance on several process measures but not with hospital readmissions or inpatient satisfaction. Significant variation exists between the best and worst financially performing Trusts.

### Implications of all the available evidence

The causal nature of relationships between financial performance, process measures and outcomes remains problematic to entangle but specific findings from our study merit further consideration. The lack of significant association between operating margin and either readmissions or inpatient satisfaction may suggest that clinical outcomes are more resilient to financial pressures than process measures, or that the driver for such clinical metrics is not predominantly financial-based. The recent narrowing of variation between the best and worst performing Trusts on the measures of A&E targets and delayed transfers of care, may be a cause for concern, suggesting that now even the best financially performing Trusts are struggling to manage demand.



## CONTRIBUTORSHIP

MN and MM conceived the study. RR and RA had critical input into study direction and interpretation. MN and GK extracted and sorted data for the study. MN performed the analysis and wrote the first draft of the manuscript. All authors (MN, GK, RR, RA, MM) contributed to critical revision of the manuscript for important intellectual content and approved the final version. MN and MM are the guarantors.

## ACKNOWLEDGEMENTS

BMJ Open Peer Reviewers whose suggestions have been incorporated into the manuscript.

## DECLARATION OF INTERESTS

All authors have completed the ICMJE uniform disclosure at [www.icmje.org/coi\\_disclosure.pdf](http://www.icmje.org/coi_disclosure.pdf). Mahiben Maruthappu serves as NHS England's Innovation Adviser and is an investor and employee of Cera Care which is a domiciliary care provider. All authors declare no support from any organisation for the submitted work, no financial relationships with any organisations that might have an interest in the submitted work in the previous three years and no other relationships or activities that could appear to have influenced the submitted work.

## FUNDING

No specific funding for this study.

## SPONSOR

No sponsor for this study.

## DATA SHARING

Raw data and analysis available on request from authors.

## TRANSPARENCY STATEMENT

1 The study guarantors (MN and MM) affirm that the manuscript is an honest, accurate, and transparent  
2 account of the study being reported; that no important aspects of the study have been omitted; and that  
3 any discrepancies from the study as planned have been explained.  
4  
5  
6  
7

## 8 **ETHICS**

9  
10 No ethical approval required as retrospective longitudinal observational study of publicly available Trust-  
11 level data.  
12  
13  
14  
15  
16  
17  
18  
19  
20  
21  
22  
23  
24  
25  
26  
27  
28  
29  
30  
31  
32  
33  
34  
35  
36  
37  
38  
39  
40  
41  
42  
43  
44  
45  
46  
47  
48  
49  
50  
51  
52  
53  
54  
55  
56  
57  
58  
59  
60

## REFERENCES

1. Lorenzoni L, Belloni A, Sassi F. Health-care expenditure and health policy in the USA versus other high-spending OECD countries. *Lancet* 2014; 384(9937): 83-92.
2. NHS. Five Year Forward View, 2014. Available online at: <http://www.england.nhs.uk/wp-content/uploads/2014/10/5yfv-web.pdf> (last accessed 29 August 2017).
3. Gulland A. NHS chief warns of more financial challenges. *BMJ* 2017; 356: J212.
4. NHS Improvement. 10 ways for NHS providers to find savings and make cost improvements. 2016. Available online at: [https://improvement.nhs.uk/uploads/documents/FIP\\_-\\_where\\_to\\_look\\_to\\_make\\_NHS\\_savings.pdf](https://improvement.nhs.uk/uploads/documents/FIP_-_where_to_look_to_make_NHS_savings.pdf) (last accessed 29 August 2017).
5. Campbell D, Morris S, Marsh S. NHS faces 'humanitarian crisis' as demand rises, British Red Cross warns. 2017. Available online at: <https://www.theguardian.com/society/2017/jan/06/nhs-faces-humanitarian-crisis-rising-demand-british-red-cross> (last accessed 29 August 2017).
6. NHS Improvement. Quarterly performance of the NHS provider sector: quarter 3 2016/17. 2017. Available online at: <https://improvement.nhs.uk/resources/quarterly-performance-nhs-provider-sector-quarter-3-1617/> (last accessed 29 August 2017).
7. NHS England. NHS England Business Plan. 2016. Available online at: <https://www.england.nhs.uk/wp-content/uploads/2016/03/bus-plan-16.pdf> (last accessed 29 August 2017).
8. Hopson C. We need to be honest and realistic about what is deliverable at the NHS front line. 2017. Available online at: <http://blogs.bmj.com/bmj/2017/01/29/chris-hopson-we-need-to-be-honest-and-realistic-about-what-is-deliverable-at-the-nhs-front-line/> (last accessed 29 August 2017).
9. QualityWatch. Indicators. Available online at: <http://www.qualitywatch.org.uk/indicators-results> (last accessed 7 May 2018).
10. Gov.uk. NHS trusts accounts data for 2015 to 2016. 2016. Available online at: <https://www.gov.uk/government/publications/nhs-trusts-accounts-data-for-2015-to-2016> (last accessed 29 August 2017).
11. Gov.uk. The Quarter, quarter 4 2010/11. 2011. Available online at: <https://www.gov.uk/government/publications/the-quarter-quarter-4-2010-11> (last accessed 29 August 2017).
12. NHS England. Bed Availability and Occupancy. 2017. Available online at: <https://www.england.nhs.uk/statistics/statistical-work-areas/bed-availability-and-occupancy/> (last accessed 29 August 2017).
13. Association of UK University Hospital Trusts. List of AUKUH Members. 2016. Available online at: <http://www.aukuh.org.uk/index.php/members/aukuh-members> (last accessed 29 August 2017).
14. Gov.uk. English indices of deprivation 2015. 2015. Available online at: <https://www.gov.uk/government/statistics/english-indices-of-deprivation-2015> (last accessed 29 August 2017).

- 1 15. NHS England. Statistical Work Areas. 2017. Available online at:  
2 <https://www.england.nhs.uk/statistics/statistical-work-areas/> (last accessed 29 August 2017).
- 3 16. NHS Surveys. Current surveys. 2017. Available online at: <http://www.nhssurveys.org/surveys>  
4 (last accessed 29 August 2017).
- 5 17. Bazzoli GJ, Chen HF, Zhao M, Lindrooth RC. Hospital financial condition and the quality of  
6 patient care. *Health Econ* 2008; 17(8): 977-95.
- 7 18. Encinosa WE, Bernard DM. Hospital finances and patient safety outcomes. *Inquiry* 2005; 42(1):  
8 60-72.
- 9 19. Joynt KE, Orav EJ, Jha AK. Association between hospital conversions to for-profit status and  
10 clinical and economic outcomes. *JAMA* 2014; 312(16): 1644-52.
- 11 20. Volpp KG, Konetzka RT, Zhu J, Parsons L, Peterson E. Effect of cuts in Medicare reimbursement  
12 on process and outcome of care for acute myocardial infarction patients. *Circulation* 2005; 112(15):  
13 2268-75.
- 14 21. Ly DP, Jha AK, Epstein AM. The association between hospital margins, quality of care, and  
15 closure or other change in operating status. *J Gen Intern Med* 2011; 26(11): 1291-6.
- 16 22. Aiken LH, Sloane DM, Bruyneel L, et al. Nurse staffing and education and hospital mortality in  
17 nine European countries: a retrospective observational study. *Lancet* 2014; 383(9931): 1824-30.
- 18 23. Gainsbury S. The bottom line. Understanding the NHS deficit and why it won't go away: The  
19 Nuffield Trust, 2017. Available online at: [https://www.nuffieldtrust.org.uk/research/the-bottom-line-  
20 understanding-the-nhs-deficit-and-why-it-won-t-go-away](https://www.nuffieldtrust.org.uk/research/the-bottom-line-understanding-the-nhs-deficit-and-why-it-won-t-go-away) (last accessed 4 October 2018).
- 21 24. The Health Foundation. System-wide problems driving NHS deficit. 2016. Available online at:  
22 <http://www.health.org.uk/news/system-wide-problems-driving-nhs-deficit> (last accessed 29 August 2017).

## FIGURE LEGENDS

**Figure 1. Distribution of average operating surplus/deficit over the 2011-16 period.**

**Figure 2. Trends in operating margin and clinical outcomes over time.**

**Figure 3. Trends in operating margin and process measures over time.** Abbreviations: A&E, Accident & Emergency.

**Figure 4. 2011-12 correlation between delayed transfers of care, elective operation cancellations, agency spend, A&E breaches and operating margin.** Elective surgery cancellations are last-minute elective operation cancellations (for non-clinical reasons) standardised in this figure to number of available beds at the Trust (as a proxy for hospital capacity). Agency spend is displayed as a proportion of turnover. Operating margin is as defined in study methods. Abbreviations: A&E, Accident & Emergency; DTOC, delayed transfer of care.

**Figure 5. 2015-16 correlation between delayed transfers of care, elective operation cancellations, agency spend, A&E breaches and operating margin.** Elective surgery cancellations are last-minute elective operation cancellations (for non-clinical reasons) standardised in this figure to number of available beds at the Trust (as a proxy for hospital capacity). Agency spend is displayed as a proportion of turnover. Operating margin is as defined in study methods. Abbreviations: A&E, Accident & Emergency; DTOC, delayed transfer of care.

## TABLE LEGENDS

**Table 1. Trust metrics by decile of Trust operating margin.** Higher deprivation score indicates more deprivation.

**Table 2. Outcomes and process measures by decile of Trust operating margin.** Values are median (IQR). P-value refers to a one-way analysis of variance (ANOVA) test. Abbreviations: A&E, Accident & Emergency.

**Table 3. Variation in outcomes and process measures over time by Trust financial performance.** 'Best 10%' refers to Trusts with operating margins in the top 10% of the sample. 'Worst 10%' refers to Trusts with operating margins in the bottom 10% of the sample.

**Table 4. Association of operating margin with outcomes and process measures.** These estimates are derived from a linear regression with outcome/process measure as the dependent variable and the following independent variables: operating margin, number of beds available and year. Each Trust in each year was treated as a separate observation with standard errors clustered by Trust to account for the non-independence of Trust-level data. Abbreviations: A&E, Accident & Emergency; CI, confidence interval.

**Table 5. Outcomes and process measures in trusts struggling (i.e. in special measures or subject to enforcement action) versus those that are not.** Values are median (IQR). P-value refers to a Kruskal-Wallis equality-of-populations rank test.

Table 1. Trust metrics by decile of Trust operating margin.

|                                                                 | Operating margin       |                      |                     |                   |
|-----------------------------------------------------------------|------------------------|----------------------|---------------------|-------------------|
|                                                                 | Bottom 10%             | 11-50%               | 51-89%              | Top 10%           |
| <b>Operating surplus / deficit (£ millions, median (range))</b> | -30.9 (-61.1 to -12.4) | -6.3 (-63.1 to -1.2) | -1.5 (-13.8 to 6.8) | 5.4 (1.3 to 32.6) |
| <b>Agency spend as proportion of turnover (%)</b>               | 6.9 (2.0)              | 4.8 (2.4)            | 3.8 (2.0)           | 3.9 (1.2)         |
| <b>Consultancy spend as proportion of turnover (%)</b>          | 0.96 (0.54)            | 0.44 (0.35)          | 0.45 (0.74)         | 0.46 (0.29)       |
| <b>Annual admissions, mean (SD)</b>                             | 26,978 (9,698)         | 29,006 (13,326)      | 36,411 (21,300)     | 30,445 (12,455)   |
| <b>Annual outpatient attendances, mean (SD)</b>                 | 271,508 (109,938)      | 295,223 (142,784)    | 374,266 (210,861)   | 407,595 (209,956) |
| <b>Bed availability, mean (SD)</b>                              | 716 (267)              | 718 (321)            | 822 (387)           | 740 (226)         |
| <b>Bed occupancy (%)</b>                                        | 90.1                   | 88.3                 | 87.2                | 88.1              |
| <b>Deprivation score, mean (SD)</b>                             | 23.4 (11.8)            | 19.2 (13.2)          | 23.3 (14.6)         | 23.5 (11.9)       |
| <b>Teaching trust (%)</b>                                       | 6.7                    | 17.0                 | 33.3                | 35.7              |
| <b>Foundation status (%)</b>                                    |                        |                      |                     |                   |
| Non-foundation trust                                            | 40.0                   | 49.2                 | 35.0                | 42.9              |
| Foundation trust                                                | 53.3                   | 47.5                 | 50.0                | 50.0              |
| Transitioned to Foundation                                      | 6.7                    | 3.4                  | 15.0                | 7.1               |
| <b>Region (%)</b>                                               |                        |                      |                     |                   |
| London                                                          | 20                     | 17                   | 17                  | 21                |
| South                                                           | 20                     | 17                   | 38                  | 7                 |
| Midlands                                                        | 40                     | 36                   | 15                  | 29                |
| North                                                           | 20                     | 31                   | 30                  | 43                |

**Table 2. Outcomes/process measures by decile of Trust operating margin.**

|                                                               | Operating margin    |                     |                     |                     | p-value |
|---------------------------------------------------------------|---------------------|---------------------|---------------------|---------------------|---------|
|                                                               | Bottom 10%          | 11-50%              | 51-89%              | Top 10%             |         |
| <b>Readmission rate (%)</b>                                   | 3.6 (3.4 to 3.9)    | 3.6 (3.1 to 3.9)    | 3.7 (3.2 to 4.0)    | 3.3 (3.0 to 3.8)    | 0.137   |
| <b>Inpatient satisfaction score (out of 10)</b>               | 8.0 (7.8 to 8.2)    | 8.0 (7.8 to 8.2)    | 7.9 (7.7 to 8.1)    | 7.9 (7.7 to 8.2)    | <0.001  |
| <b>4 hour A&amp;E target breach rate (%)</b>                  | 10.2 (6.7 to 15.1)  | 6.7 (4.9 to 10.7)   | 5.3 (4.2 to 7.3)    | 5.3 (3.9 to 6.7)    | <0.001  |
| <b>Delayed transfer of care days per hospital bed</b>         | 11.1 (6.0 to 17.1)  | 7.4 (4.5 to 10.9)   | 6.5 (3.7 to 11.0)   | 5.7 (2.6 to 8.1)    | <0.001  |
| <b>Cancer two week wait target adherence (%)</b>              | 94.9 (93.2 to 96.2) | 95.5 (94.2 to 96.7) | 95.4 (94.4 to 96.7) | 95.6 (95.0 to 96.5) | 0.009   |
| <b>Cancer 62 days to first treatment target adherence (%)</b> | 86.2 (81.9 to 88.2) | 86.6 (83.6 to 89.1) | 87.6 (85.6 to 89.6) | 88.0 (86.3 to 89.9) | <0.001  |



Table 3. Variation in outcomes and process measures over time by Trust financial performance.

| Readmissions (%)                                  |       |       |       |       |       |       |
|---------------------------------------------------|-------|-------|-------|-------|-------|-------|
|                                                   | 2011  | 2012  | 2013  | 2014  | 2015  | 2016  |
| <b>Worst 10%</b>                                  | -     | -     | -     | 3.6   | 3.7   | 3.8   |
| <b>Middle 80%</b>                                 | -     | -     | -     | 3.4   | 3.6   | 3.6   |
| <b>Best 10%</b>                                   | -     | -     | -     | 3.4   | 3.5   | 3.6   |
| <b>Ratio of worst to best</b>                     | -     | -     | -     | 1.1   | 1.0   | 1.1   |
| <b>Difference (best and worst)</b>                | -     | -     | -     | 0.2   | 0.1   | 0.2   |
| Inpatient satisfaction survey (score out of 10)   |       |       |       |       |       |       |
|                                                   | 2011  | 2012  | 2013  | 2014  | 2015  | 2016  |
| <b>Worst 10%</b>                                  | 7.5   | 7.7   | 7.9   | 7.9   | 8.0   | 8.0   |
| <b>Middle 80%</b>                                 | 7.7   | 7.8   | 7.9   | 8.0   | 8.1   | 8.1   |
| <b>Best 10%</b>                                   | 7.8   | 7.8   | 7.9   | 8.0   | 8.1   | 8.1   |
| <b>Ratio of worst to best</b>                     | 1.0   | 1.0   | 1.0   | 1.0   | 1.0   | 1.0   |
| <b>Difference (best and worst)</b>                | 0.3   | 0.1   | 0.0   | 0.1   | 0.1   | 0.1   |
| Accident & Emergency breach rate (%)              |       |       |       |       |       |       |
|                                                   | 2011  | 2012  | 2013  | 2014  | 2015  | 2016  |
| <b>Worst 10%</b>                                  | 8.2   | 6.4   | 7.8   | 7.8   | 11.9  | 13.6  |
| <b>Middle 80%</b>                                 | 5.2   | 4.9   | 6.0   | 6.3   | 9.3   | 12.0  |
| <b>Best 10%</b>                                   | 4.2   | 4.5   | 5.5   | 5.9   | 7.5   | 10.4  |
| <b>Ratio of worst to best</b>                     | 2.0   | 1.4   | 1.4   | 1.3   | 1.6   | 1.3   |
| <b>Difference (best and worst)</b>                | 4.0   | 1.9   | 2.3   | 1.9   | 4.4   | 3.2   |
| Delayed transfers of care days                    |       |       |       |       |       |       |
|                                                   | 2011  | 2012  | 2013  | 2014  | 2015  | 2016  |
| <b>Worst 10%</b>                                  | 5,077 | 6,657 | 7,248 | 6,972 | 7,813 | 8,284 |
| <b>Middle 80%</b>                                 | 4,851 | 5,082 | 5,558 | 6,046 | 7,311 | 8,044 |
| <b>Best 10%</b>                                   | 3,850 | 3,722 | 3,884 | 3,932 | 5,712 | 6,477 |
| <b>Ratio of worst to best</b>                     | 1.3   | 1.8   | 1.9   | 1.8   | 1.4   | 1.3   |
| <b>Difference (best and worst)</b>                | 1,227 | 2,935 | 3,364 | 3,040 | 2,101 | 1,807 |
| Cancer two week wait target breach rate (%)       |       |       |       |       |       |       |
|                                                   | 2011  | 2012  | 2013  | 2014  | 2015  | 2016  |
| <b>Worst 10%</b>                                  | 4.2   | 4.2   | 4.6   | 4.8   | 6.2   | 5.9   |
| <b>Middle 80%</b>                                 | 4.3   | 3.9   | 4.3   | 4.4   | 5.7   | 5.5   |
| <b>Best 10%</b>                                   | 4.6   | 4.1   | 4.0   | 4.6   | 5.9   | 5.2   |
| <b>Ratio of worst to best</b>                     | 0.9   | 1.0   | 1.2   | 1.0   | 1.1   | 1.1   |
| <b>Difference (best and worst)</b>                | -0.4  | 0.1   | 0.6   | 0.2   | 0.3   | 0.7   |
| Cancer 62 days to first treatment breach rate (%) |       |       |       |       |       |       |
|                                                   | 2011  | 2012  | 2013  | 2014  | 2015  | 2016  |
| <b>Worst 10%</b>                                  | 11.9  | 11.7  | 12.2  | 13.7  | 16.6  | 18.3  |
| <b>Middle 80%</b>                                 | 12.1  | 12.0  | 12.2  | 13.4  | 15.6  | 16.2  |
| <b>Best 10%</b>                                   | 11.9  | 11.7  | 10.0  | 11.7  | 13.5  | 15.2  |
| <b>Ratio of worst to best</b>                     | 1.0   | 1.0   | 1.2   | 1.2   | 1.2   | 1.2   |
| <b>Difference (best and worst)</b>                | 0.0   | 0.0   | 2.2   | 2.0   | 3.1   | 3.1   |

**Table 4. Association of operating margin on outcomes and process measures.**

| Outcome                                         | n   | Trust clusters | Coefficient | 95% CI          | p-value |
|-------------------------------------------------|-----|----------------|-------------|-----------------|---------|
| Readmission rate (%)                            | 387 | 135            | -0.012      | -0.029 to 0.005 | 0.164   |
| Inpatient satisfaction score (out of 10)        | 825 | 148            | 0.80        | -0.06 to 1.67   | 0.067   |
| A&E 4 hour breach rate (%)                      | 835 | 148            | -0.24       | -0.33 to -0.15  | <0.001  |
| Delayed transfers of care days per hospital bed | 837 | 148            | -25.1       | -39.1 to -11.0  | 0.001   |
| 2 week wait cancer target adherence (%)         | 833 | 148            | 0.05        | 0.00 to 0.09    | 0.031   |
| 62 day cancer treatment target adherence (%)    | 833 | 148            | 0.12        | 0.03 to 0.21    | 0.009   |

**Table 5. Outcomes and process measures in trusts struggling (i.e. in special measures or subject to enforcement action) versus those that are not.**

|                                                        | Struggling trust    | Non-struggling trust | p-value |
|--------------------------------------------------------|---------------------|----------------------|---------|
| Readmission rate (%)                                   | 3.6 (3.1 to 3.9)    | 3.7 (3.1 to 3.9)     | 0.285   |
| Inpatient satisfaction score (out of 10)               | 7.9 (7.8 to 8.1)    | 7.9 (7.8 to 8.1)     | 0.378   |
| A&E 4 hour target breach rate (%)                      | 6.8 (5.2 to 10.2)   | 5.5 (4.2 to 8.3)     | <0.001  |
| Delayed transfer of care days per hospital bed         | 8.2 (4.5 to 11.9)   | 6.4 (4.0 to 10.4)    | 0.005   |
| Cancer two week wait target adherence (%)              | 95.1 (94.0 to 96.4) | 95.5 (94.4 to 96.8)  | 0.002   |
| Cancer 62 days to first treatment target adherence (%) | 86.6 (83.7 to 88.9) | 87.4 (84.8 to 89.6)  | 0.002   |

1  
2  
3  
4  
5  
6  
7  
8  
9  
10  
11  
12  
13  
14  
15  
16  
17  
18  
19  
20  
21  
22  
23  
24  
25  
26  
27  
28  
29  
30  
31  
32  
33  
34  
35  
36  
37  
38  
39  
40  
41  
42  
43  
44  
45  
46  
47  
48  
49  
50  
51  
52  
53  
54  
55  
56  
57  
58  
59  
60

For peer review only

1  
2  
3  
4  
5  
6  
7  
8  
9  
10  
11  
12  
13  
14  
15  
16  
17  
18  
19  
20  
21  
22  
23  
24  
25  
26  
27  
28  
29  
30  
31  
32  
33  
34  
35  
36  
37  
38  
39  
40  
41  
42  
43  
44  
45  
46  
47  
48  
49  
50  
51  
52  
53  
54  
55  
56  
57  
58  
59  
60

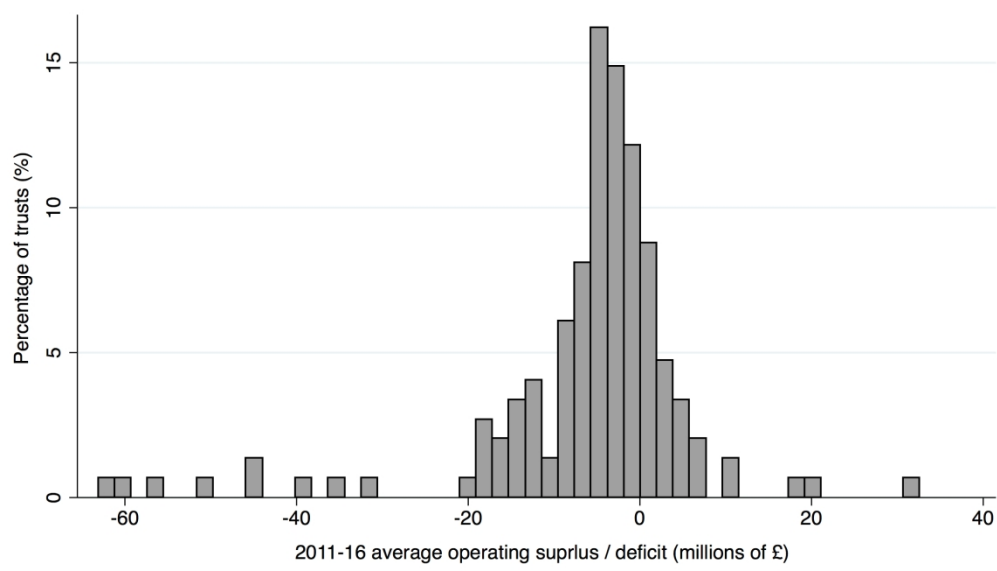

Figure 1. Distribution of average operating surplus/deficit over the 2011-16 period.

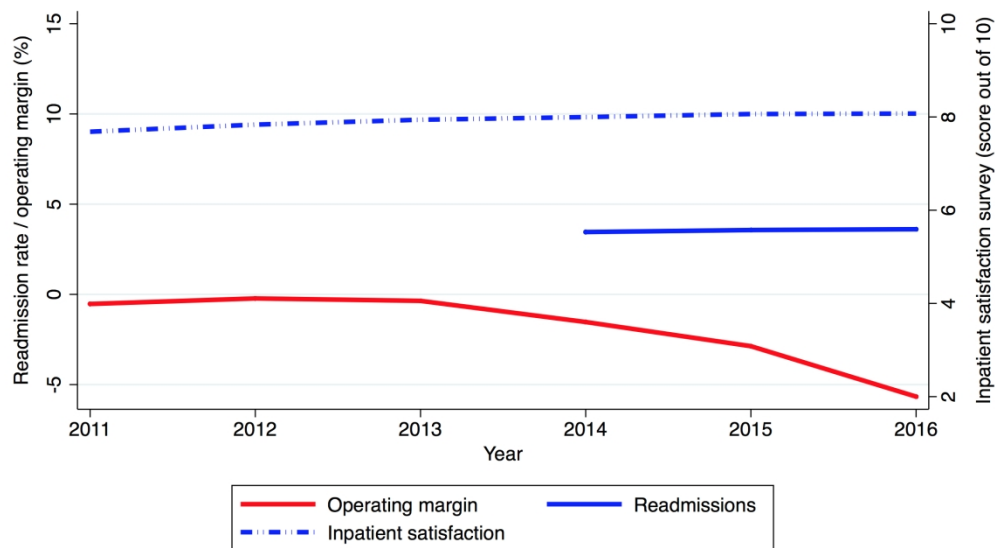

Figure 2. Trends in operating margin and clinical outcomes over time.

1  
2  
3  
4  
5  
6  
7  
8  
9  
10  
11  
12  
13  
14  
15  
16  
17  
18  
19  
20  
21  
22  
23  
24  
25  
26  
27  
28  
29  
30  
31  
32  
33  
34  
35  
36  
37  
38  
39  
40  
41  
42  
43  
44  
45  
46  
47  
48  
49  
50  
51  
52  
53  
54  
55  
56  
57  
58  
59  
60

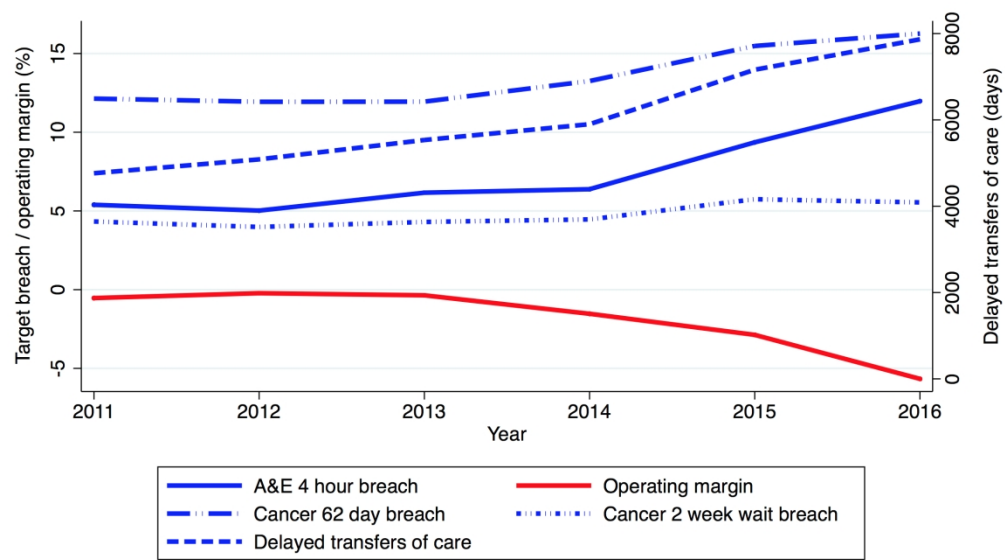

Figure 3. Trends in operating margin and process measures over time. Abbreviations: A&E, Accident & Emergency.

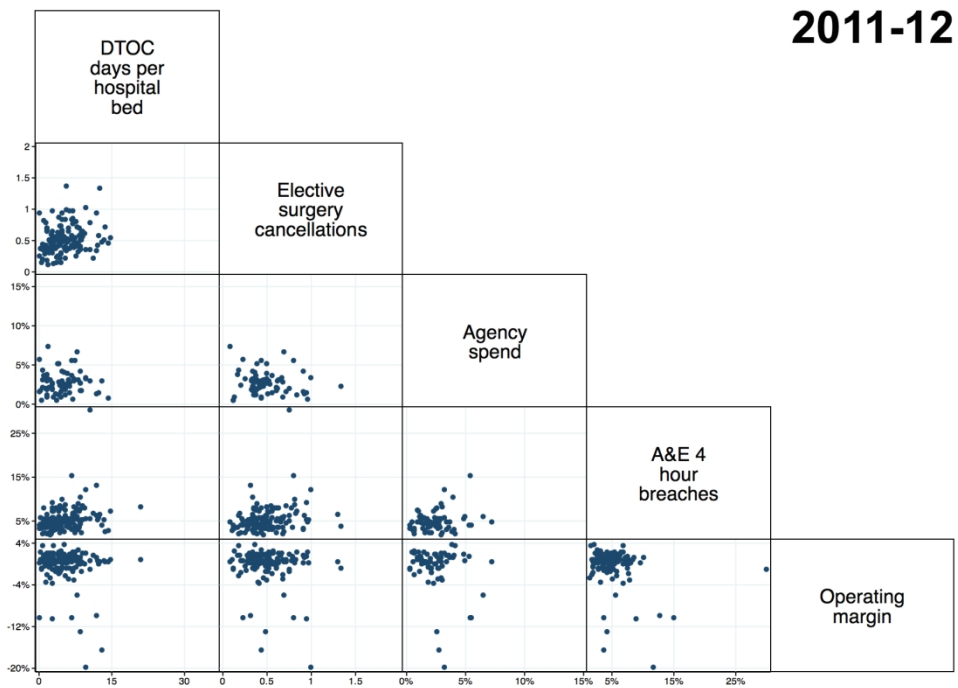

Figure 4. 2011-12 correlation between delayed transfers of care, elective operation cancellations, agency spend, A&E breaches and operating margin. Elective surgery cancellations are last-minute elective operation cancellations (for non-clinical reasons) standardised in this figure to number of available beds at the Trust (as a proxy for hospital capacity). Agency spend is displayed as a proportion of turnover. Operating margin is as defined in study methods. Abbreviations: A&E, Accident & Emergency; DTOC, delayed transfer of care.

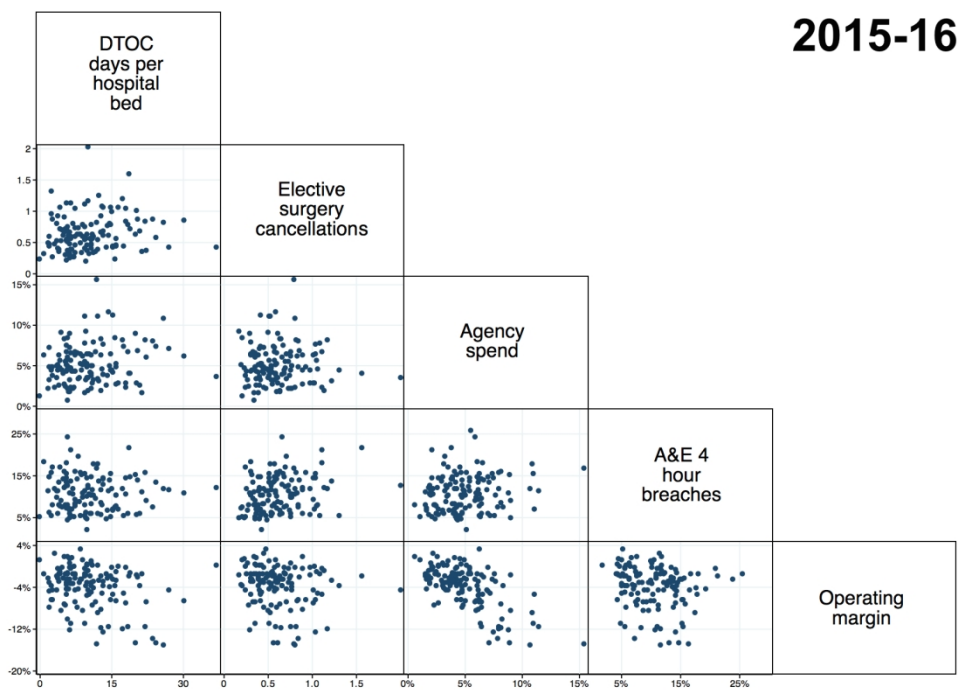

Figure 5. 2015-16 correlation between delayed transfers of care, elective operation cancellations, agency spend, A&E breaches and operating margin. Elective surgery cancellations are last-minute elective operation cancellations (for non-clinical reasons) standardised in this figure to number of available beds at the Trust (as a proxy for hospital capacity). Agency spend is displayed as a proportion of turnover. Operating margin is as defined in study methods. Abbreviations: A&E, Accident & Emergency; DTOC, delayed transfer of care.



STROBE Statement—Checklist of items that should be included in reports of *cohort studies*

|                              | Item No | Recommendation                                                                                                                                                                                           |
|------------------------------|---------|----------------------------------------------------------------------------------------------------------------------------------------------------------------------------------------------------------|
| <b>Title and abstract</b>    | 1       | (a) Indicate the study's design with a commonly used term in the title or the abstract<br><b>PAGE 1</b>                                                                                                  |
|                              |         | (b) Provide in the abstract an informative and balanced summary of what was done and what was found<br><b>PAGE 2</b>                                                                                     |
| <b>Introduction</b>          |         |                                                                                                                                                                                                          |
| Background/rationale         | 2       | Explain the scientific background and rationale for the investigation being reported<br><b>PAGE 4</b>                                                                                                    |
| Objectives                   | 3       | State specific objectives, including any pre-specified hypotheses<br><b>PAGE 4</b>                                                                                                                       |
| <b>Methods</b>               |         |                                                                                                                                                                                                          |
| Study design                 | 4       | Present key elements of study design early in the paper<br><b>PAGES 5-7</b>                                                                                                                              |
| Setting                      | 5       | Describe the setting, locations, and relevant dates, including periods of recruitment, exposure, follow-up, and data collection<br><b>PAGES 5-7 (IN SO FAR AS APPLICABLE TO THIS STUDY)</b>              |
| Participants                 | 6       | (a) Give the eligibility criteria, and the sources and methods of selection of participants. Describe methods of follow-up<br><b>PAGE 5 (NO PARTICIPANTS, DESCRIBED FOR CENTRES)</b>                     |
|                              |         | (b) For matched studies, give matching criteria and number of exposed and unexposed<br><b>NOT APPLICABLE</b>                                                                                             |
| Variables                    | 7       | Clearly define all outcomes, exposures, predictors, potential confounders, and effect modifiers. Give diagnostic criteria, if applicable<br><b>PAGES 5-7</b>                                             |
| Data sources/<br>measurement | 8*      | For each variable of interest, give sources of data and details of methods of assessment (measurement). Describe comparability of assessment methods if there is more than one group<br><b>PAGES 5-7</b> |
| Bias                         | 9       | Describe any efforts to address potential sources of bias                                                                                                                                                |
| Study size                   | 10      | Explain how the study size was arrived at<br><b>PAGE 5</b>                                                                                                                                               |
| Quantitative variables       | 11      | Explain how quantitative variables were handled in the analyses. If applicable, describe which groupings were chosen and why                                                                             |
| Statistical methods          | 12      | (a) Describe all statistical methods, including those used to control for confounding<br><b>PAGES 7-8</b>                                                                                                |
|                              |         | (b) Describe any methods used to examine subgroups and interactions<br><b>PAGE 7</b>                                                                                                                     |
|                              |         | (c) Explain how missing data were addressed<br><b>PAGES 6-7</b>                                                                                                                                          |
|                              |         | (d) If applicable, explain how loss to follow-up was addressed<br><b>NOT APPLICABLE</b>                                                                                                                  |
|                              |         | (e) Describe any sensitivity analyses<br><b>PAGE 8</b>                                                                                                                                                   |

1  
2  
3  
4  
5  
6  
7  
8  
9  
10  
11  
12  
13  
14  
15  
16  
17  
18  
19  
20  
21  
22  
23  
24  
25  
26  
27  
28  
29  
30  
31  
32  
33  
34  
35  
36  
37  
38  
39  
40  
41  
42  
43  
44  
45  
46  
47  
48  
49  
50  
51  
52  
53  
54  
55  
56  
57  
58  
59  
60**Results**

|                          |     |                                                                                                                                                                                                                                                                                                                                                                                                                                                                                                                        |
|--------------------------|-----|------------------------------------------------------------------------------------------------------------------------------------------------------------------------------------------------------------------------------------------------------------------------------------------------------------------------------------------------------------------------------------------------------------------------------------------------------------------------------------------------------------------------|
| Participants             | 13* | (a) Report numbers of individuals at each stage of study—eg numbers potentially eligible, examined for eligibility, confirmed eligible, included in the study, completing follow-up, and analysed<br><b>NOT APPLICABLE</b><br>(b) Give reasons for non-participation at each stage<br><b>NOT APPLICABLE BUT DETAILS GIVEN IN ONLINE APPENDIX REGARDING CHANGE IN COMPOSITION OF TRUSTS</b><br>(c) Consider use of a flow diagram<br><b>NOT APPLICABLE</b>                                                              |
| Descriptive data         | 14* | (a) Give characteristics of study participants (eg demographic, clinical, social) and information on exposures and potential confounders<br><b>NOT APPLICABLE BUT DETAILS FOR TRUSTS GIVEN ON PAGES 9 &amp; 24</b><br>(b) Indicate number of participants with missing data for each variable of interest<br><b>NOT APPLICABLE BUT DETAILS FOR TRUSTS GIVEN ON PAGE 5 IN METHODS SECTION</b><br>(c) Summarise follow-up time (eg, average and total amount)<br><b>NOT APPLICABLE AS FOLLOW-UP TIME IS STUDY-PERIOD</b> |
| Outcome data             | 15* | Report numbers of outcome events or summary measures over time<br><b>NOT APPLICABLE IN THE FORMAT OF NUMBER OF OUTCOME EVENTS</b>                                                                                                                                                                                                                                                                                                                                                                                      |
| Main results             | 16  | (a) Give unadjusted estimates and, if applicable, confounder-adjusted estimates and their precision (eg, 95% confidence interval). Make clear which confounders were adjusted for and why they were included<br><b>PAGES 9-11</b><br>(b) Report category boundaries when continuous variables were categorized<br><b>PAGES 9-11</b><br>(c) If relevant, consider translating estimates of relative risk into absolute risk for a meaningful time period<br><b>NOT APPLICABLE</b>                                       |
| Other analyses           | 17  | Report other analyses done—eg analyses of subgroups and interactions, and sensitivity analyses<br><b>PAGE 11 AND ONLINE APPENDIX</b>                                                                                                                                                                                                                                                                                                                                                                                   |
| <b>Discussion</b>        |     |                                                                                                                                                                                                                                                                                                                                                                                                                                                                                                                        |
| Key results              | 18  | Summarise key results with reference to study objectives<br><b>PAGE 11</b>                                                                                                                                                                                                                                                                                                                                                                                                                                             |
| Limitations              | 19  | Discuss limitations of the study, taking into account sources of potential bias or imprecision. Discuss both direction and magnitude of any potential bias<br><b>PAGES 13-14</b>                                                                                                                                                                                                                                                                                                                                       |
| Interpretation           | 20  | Give a cautious overall interpretation of results considering objectives, limitations, multiplicity of analyses, results from similar studies, and other relevant evidence<br><b>PAGES 14-16</b>                                                                                                                                                                                                                                                                                                                       |
| Generalisability         | 21  | Discuss the generalisability (external validity) of the study results<br><b>PAGES 14-16</b>                                                                                                                                                                                                                                                                                                                                                                                                                            |
| <b>Other information</b> |     |                                                                                                                                                                                                                                                                                                                                                                                                                                                                                                                        |
| Funding                  | 22  | Give the source of funding and the role of the funders for the present study and, if applicable, for the original study on which the present article is based                                                                                                                                                                                                                                                                                                                                                          |

\*Give information separately for exposed and unexposed groups.

**Note:** An Explanation and Elaboration article discusses each checklist item and gives methodological background and published examples of transparent reporting. The STROBE checklist is best used in conjunction with this article (freely available on the Web sites of PLoS Medicine at <http://www.plosmedicine.org/>, Annals of Internal Medicine at <http://www.annals.org/>, and Epidemiology at <http://www.epidem.com/>). Information on the STROBE Initiative is available at <http://www.strobe-statement.org>.

For peer review only

# Financial Performance of English NHS Trusts and Clinical Outcomes: A Longitudinal Observational Study

## ONLINE SUPPLEMENTAL DATA

Myura Nagendran, MRCP<sup>1</sup>

Grace Kiew, MB BChir<sup>2</sup>

Rosalind Raine, PhD<sup>3</sup>

Rifat Atun, FRCP<sup>4</sup>

Mahiben Maruthappu, BM BCh<sup>5</sup>

1. Honorary Clinical Research Fellow, Division of Anaesthetics, Pain Medicine and Intensive Care, Imperial College London, UK
2. Foundation Doctor, North West Anglia NHS Foundation Trust, Peterborough, UK
3. Professor, Department of Applied Health Care, University College London, UK
4. Professor, Harvard T.H. Chan School of Public Health, Harvard University, Boston, MA, USA
5. Public Health Registrar, Department of Epidemiology and Public Health, University College London, UK

**Supplement version:** 2.2

## FINANCIAL DATA EXTRACTION

Where financial data was extracted from consolidated end of year accounts files via the gov.uk open data portal, the following fields were extracted:

### For foundation trusts:

Turnover --> Table ID 1, Subcode 100  
Surplus/Deficit --> Table ID 1, Subcode 160  
Consultancy --> 07A and 07I, subcode 280  
Agency spend --> 1415TRU06\_EXP\_P13, maincode 01, subcode 180

### For non-Foundation trusts:

Turnover --> Table ID CNE, Subcode 120 and 130  
Surplus/Deficit --> Table ID CNE, Subcode 390  
Consultancy --> 08C, subcode 125 (*only available for 2014-16*)  
Agency spend --> 1415TRU09\_EMP\_P13, maincode 04, subcode 100 (*only available for 2015-16*)

## DELAYED TRANSFERS OF CARE IN FINANCIAL YEAR ENDING 2011

Delayed transfer of care data were only available at Trust level for the latter eight months of the 2011 financial year. To ensure comparability with other years, a 1.5x multiplier was applied for each trust in this financial year with a sensitivity analysis to examine any impact of this change.

The total numbers of delayed transfers for all hospitals were available as an aggregate total (data obtained from King's Fund Quarterly Monitoring Report for 2010-11).

The ratio of aggregate delayed transfer of care days for the first 4 months (April 2010 to July 2010) to the last 8 months (August 2010 to March 2011) was 0.492; suggesting that a 1.5x multiplier appeared reasonable.

| Year | Month | Number of DTOCs | 4-monthly total |
|------|-------|-----------------|-----------------|
| 2010 | Apr   | 113900          | -               |
| 2010 | May   | 112442          | -               |
| 2010 | Jun   | 115336          | -               |
| 2010 | Jul   | 109918          | <b>451596</b>   |
| -    | -     | -               | -               |
| 2010 | Aug   | 115855          | -               |
| 2010 | Sep   | 113246          | -               |
| 2010 | Oct   | 113091          | -               |
| 2010 | Nov   | 116466          | <b>458658</b>   |
| -    | -     | -               | -               |
| 2010 | Dec   | 114346          | -               |
| 2011 | Jan   | 112386          | -               |
| 2011 | Feb   | 123130          | -               |
| 2011 | Mar   | 109362          | <b>459224</b>   |

## CHANGES TO TRUST COMPOSITION

The 168 Trusts listed below include specialist Trusts (e.g. Great Ormond Street Hospital for Children NHS Foundation Trust) that were excluded prior to analysis. Changes in composition to the Trusts (creation of a new Trust, dissolution of an existing Trust, acquisitions of a hospital or entire Trust to another Trust and mergers between Trusts) are detailed at the end of the table.

| Trust                                                           | Trust identifier | Change in composition | Transitioned to Foundation status | Foundation Trust transition date |
|-----------------------------------------------------------------|------------------|-----------------------|-----------------------------------|----------------------------------|
| Aintree University Hospital NHS Foundation Trust                | REM              |                       |                                   |                                  |
| Airedale NHS Foundation Trust                                   | RCF              |                       | Yes                               | 01/06/2010                       |
| Alder Hey Children's NHS Foundation Trust                       | RBS              |                       |                                   |                                  |
| Ashford and St Peter's Hospitals NHS Foundation Trust           | RTK              |                       | Yes                               | 01/12/2010                       |
| Barking, Havering and Redbridge University Hospitals NHS Trust  | RF4              |                       |                                   |                                  |
| Barnet and Chase Farm Hospitals NHS Trust                       | RVL              | Yes (1)               |                                   |                                  |
| Barnsley Hospital NHS Foundation Trust                          | RFF              |                       |                                   |                                  |
| Barts and the London NHS Trust                                  | RNJ              | Yes (2)               |                                   |                                  |
| Barts Health NHS Trust                                          | R1H              | Yes (3)               |                                   |                                  |
| Basildon and Thurrock University Hospitals NHS Foundation Trust | RDD              |                       |                                   |                                  |
| Bedford Hospital NHS Trust                                      | RC1              |                       |                                   |                                  |
| Birmingham Children's Hospital NHS Foundation Trust             | RQ3              |                       |                                   |                                  |
| Birmingham Women's NHS Foundation Trust                         | RLU              |                       |                                   |                                  |
| Blackpool Teaching Hospitals NHS Foundation Trust               | RXL              |                       |                                   |                                  |
| Bolton NHS Foundation Trust                                     | RMC              |                       |                                   |                                  |
| Bradford Teaching Hospitals NHS Foundation Trust                | RAE              |                       |                                   |                                  |
| Brighton and Sussex University Hospitals NHS Trust              | RXH              |                       |                                   |                                  |
| Buckinghamshire Healthcare NHS Trust                            | RXQ              |                       |                                   |                                  |

|    |                                                                |     |         |            |
|----|----------------------------------------------------------------|-----|---------|------------|
| 1  |                                                                |     |         |            |
| 2  |                                                                |     |         |            |
| 3  | Burton Hospitals NHS Foundation Trust                          | RJF |         |            |
| 4  | Calderdale and Huddersfield NHS Foundation Trust               | RWY |         |            |
| 5  | Cambridge University Hospitals NHS Foundation Trust            | RGT |         |            |
| 6  | Central Manchester University Hospitals NHS Foundation Trust   | RW3 | Yes (4) |            |
| 7  | Chelsea and Westminster Hospital NHS Foundation Trust          | RQM | Yes (5) |            |
| 8  | Chesterfield Royal Hospital NHS Foundation Trust               | RFS |         |            |
| 9  | City Hospitals Sunderland NHS Foundation Trust                 | RLN |         |            |
| 10 | Colchester Hospital University NHS Foundation Trust            | RDE |         |            |
| 11 | Countess Of Chester Hospital NHS Foundation Trust              | RJR |         |            |
| 12 | County Durham and Darlington NHS Foundation Trust              | RXP |         |            |
| 13 | Croydon Health Services NHS Trust                              | RJ6 |         |            |
| 14 | Dartford and Gravesham NHS Trust                               | RN7 |         |            |
| 15 | Derby Teaching Hospitals NHS Foundation Trust                  | RTG |         |            |
| 16 | Doncaster and Bassetlaw Hospitals NHS Foundation Trust         | RP5 |         |            |
| 17 | Dorset County Hospital NHS Foundation Trust                    | RBD |         |            |
| 18 | Ealing Hospital NHS Trust                                      | RC3 | Yes (6) |            |
| 19 | East and North Hertfordshire NHS Trust                         | RWH |         |            |
| 20 | East Cheshire NHS Trust                                        | RJN |         |            |
| 21 | East Kent Hospitals University NHS Foundation Trust            | RVV |         |            |
| 22 | East Lancashire Hospitals NHS Trust                            | RXR |         |            |
| 23 | East Sussex Healthcare NHS Trust                               | RXC |         |            |
| 24 | Epsom and St Helier University Hospitals NHS Trust             | RVR |         |            |
| 25 | Frimley Health NHS Foundation Trust                            | RDU | Yes (7) |            |
| 26 | Gateshead Health NHS Foundation Trust                          | RR7 |         |            |
| 27 | George Eliot Hospital NHS Trust                                | RLT |         |            |
| 28 | Gloucestershire Hospitals NHS Foundation Trust                 | RTE |         |            |
| 29 | Great Ormond Street Hospital for Children NHS Foundation Trust | RP4 |         | Yes        |
| 30 | Great Western Hospitals NHS Foundation Trust                   | RN3 |         | 01/03/2012 |
| 31 | Guy's and St Thomas' NHS Foundation Trust                      | RJ1 |         |            |
| 32 | Hampshire Hospitals NHS Foundation Trust                       | RN5 | Yes (8) |            |
| 33 |                                                                |     |         |            |
| 34 |                                                                |     |         |            |
| 35 |                                                                |     |         |            |
| 36 |                                                                |     |         |            |
| 37 |                                                                |     |         |            |
| 38 |                                                                |     |         |            |
| 39 |                                                                |     |         |            |
| 40 |                                                                |     |         |            |
| 41 |                                                                |     |         |            |
| 42 |                                                                |     |         |            |
| 43 |                                                                |     |         |            |
| 44 |                                                                |     |         |            |
| 45 |                                                                |     |         |            |
| 46 |                                                                |     |         |            |
| 47 |                                                                |     |         |            |



|    |                                                               |     |          |            |
|----|---------------------------------------------------------------|-----|----------|------------|
| 1  |                                                               |     |          |            |
| 2  |                                                               |     |          |            |
| 3  | Harrogate and District NHS Foundation Trust                   | RCD |          |            |
| 4  | Heart Of England NHS Foundation Trust                         | RR1 |          |            |
| 5  | Heatherwood and Wexham Park Hospitals NHS Foundation Trust    | RD7 | Yes (9)  |            |
| 6  | Hinchingbrooke Health Care NHS Trust                          | RQQ |          |            |
| 7  | Homerton University Hospital NHS Foundation Trust             | RQX |          |            |
| 8  | Hull and East Yorkshire Hospitals NHS Trust                   | RWA |          |            |
| 9  | Imperial College Healthcare NHS Trust                         | RYJ |          |            |
| 10 | Ipswich Hospital NHS Trust                                    | RGQ |          |            |
| 11 | Isle Of Wight NHS Trust                                       | R1F | Yes (10) |            |
| 12 | James Paget University Hospitals NHS Foundation Trust         | RGP |          |            |
| 13 | Kettering General Hospital NHS Foundation Trust               | RNQ |          |            |
| 14 | King's College Hospital NHS Foundation Trust                  | RJZ | Yes (11) |            |
| 15 | Kingston Hospital NHS Foundation Trust                        | RAX |          | Yes        |
| 16 | Lancashire Teaching Hospitals NHS Foundation Trust            | RXN |          | 01/05/2013 |
| 17 | Leeds Teaching Hospitals NHS Trust                            | RR8 |          |            |
| 18 | Lewisham and Greenwich NHS Trust                              | RJ2 | Yes (12) |            |
| 19 | Liverpool Heart and Chest NHS Foundation Trust                | RBQ |          |            |
| 20 | Liverpool Women's NHS Foundation Trust                        | REP |          |            |
| 21 | London North West Healthcare NHS Trust                        | R1K | Yes (13) |            |
| 22 | Luton and Dunstable University Hospital NHS Foundation Trust  | RC9 |          |            |
| 23 | Maidstone and Tunbridge Wells NHS Trust                       | RWF |          |            |
| 24 | Medway NHS Foundation Trust                                   | RPA |          |            |
| 25 | Mid Cheshire Hospitals NHS Foundation Trust                   | RBT |          |            |
| 26 | Mid Essex Hospital Services NHS Trust                         | RQ8 |          |            |
| 27 | Mid Staffordshire NHS Foundation Trust                        | RJD | Yes (14) |            |
| 28 | Mid Yorkshire Hospitals NHS Trust                             | RXF |          |            |
| 29 | Milton Keynes University Hospital NHS Foundation Trust        | RD8 |          |            |
| 30 | Moorfields Eye Hospital NHS Foundation Trust                  | RP6 |          |            |
| 31 | Newham University Hospital NHS Trust                          | RNH | Yes (15) |            |
| 32 | Norfolk and Norwich University Hospitals NHS Foundation Trust | RM1 |          |            |
| 33 |                                                               |     |          |            |
| 34 |                                                               |     |          |            |
| 35 |                                                               |     |          |            |
| 36 |                                                               |     |          |            |
| 37 |                                                               |     |          |            |
| 38 |                                                               |     |          |            |
| 39 |                                                               |     |          |            |
| 40 |                                                               |     |          |            |
| 41 |                                                               |     |          |            |
| 42 |                                                               |     |          |            |
| 43 |                                                               |     |          |            |
| 44 |                                                               |     |          |            |
| 45 |                                                               |     |          |            |
| 46 |                                                               |     |          |            |
| 47 |                                                               |     |          |            |

|    |                                                                                    |     |          |     |            |
|----|------------------------------------------------------------------------------------|-----|----------|-----|------------|
| 1  |                                                                                    |     |          |     |            |
| 2  |                                                                                    |     |          |     |            |
| 3  | North Bristol NHS Trust                                                            | RVJ |          |     |            |
| 4  | North Cumbria University Hospitals NHS Trust                                       | RNL |          |     |            |
| 5  | North Middlesex University Hospital NHS Trust                                      | RAP |          |     |            |
| 6  | North Tees and Hartlepool NHS Foundation Trust                                     | RVW |          |     |            |
| 7  |                                                                                    |     |          |     |            |
| 8  | North West London Hospitals NHS Trust                                              | RV8 | Yes (16) |     |            |
| 9  | Northampton General Hospital NHS Trust                                             | RNS |          |     |            |
| 10 |                                                                                    |     |          |     |            |
| 11 | Northern Devon Healthcare NHS Trust                                                | RBZ |          |     |            |
| 12 | Northern Lincolnshire and Goole NHS Foundation Trust                               | RJL |          |     |            |
| 13 | Northumbria Healthcare NHS Foundation Trust                                        | RTF |          |     |            |
| 14 | Nottingham University Hospitals NHS Trust                                          | RX1 |          |     |            |
| 15 |                                                                                    |     |          |     |            |
| 16 | Oxford University Hospitals NHS Foundation Trust                                   | RTH | Yes (17) | Yes | 01/10/2015 |
| 17 | Papworth Hospital NHS Foundation Trust                                             | RGM |          |     |            |
| 18 | Pennine Acute Hospitals NHS Trust                                                  | RW6 |          |     |            |
| 19 |                                                                                    |     |          |     |            |
| 20 | Peterborough and Stamford Hospitals NHS Foundation Trust                           | RGN |          |     |            |
| 21 | Plymouth Hospitals NHS Trust                                                       | RK9 |          |     |            |
| 22 | Poole Hospital NHS Foundation Trust                                                | RD3 |          |     |            |
| 23 | Portsmouth Hospitals NHS Trust                                                     | RHU |          |     |            |
| 24 |                                                                                    |     |          |     |            |
| 25 | Queen Victoria Hospital NHS Foundation Trust                                       | RPC |          |     |            |
| 26 | Robert Jones and Agnes Hunt Orthopaedic and District Hospital NHS Foundation Trust | RL1 |          | Yes | 01/08/2011 |
| 27 | Royal Berkshire NHS Foundation Trust                                               | RHW |          |     |            |
| 28 |                                                                                    |     |          |     |            |
| 29 | Royal Brompton and Harefield NHS Foundation Trust                                  | RT3 |          |     |            |
| 30 | Royal Cornwall Hospitals NHS Trust                                                 | REF |          |     |            |
| 31 | Royal Devon and Exeter NHS Foundation Trust                                        | RH8 |          |     |            |
| 32 | Royal Free London NHS Foundation Trust                                             | RAL | Yes (18) | Yes | 01/04/2012 |
| 33 |                                                                                    |     |          |     |            |
| 34 | Royal Liverpool and Broadgreen University Hospitals NHS Trust                      | RQ6 |          |     |            |
| 35 | Royal National Hospital For Rheumatic Diseases NHS Foundation Trust                | RBB | Yes (19) |     |            |
| 36 | Royal National Orthopaedic Hospital NHS Trust                                      | RAN |          |     |            |
| 37 | Royal Surrey County NHS Foundation Trust                                           | RA2 |          |     |            |
| 38 |                                                                                    |     |          |     |            |
| 39 | Royal United Hospitals Bath NHS Foundation Trust                                   | RD1 | Yes (20) | Yes | 01/11/2014 |
| 40 | Salford Royal NHS Foundation Trust                                                 | RM3 |          |     |            |

|    |                                                                       |     |          |            |
|----|-----------------------------------------------------------------------|-----|----------|------------|
| 1  |                                                                       |     |          |            |
| 2  |                                                                       |     |          |            |
| 3  | Salisbury NHS Foundation Trust                                        | RNZ |          |            |
| 4  | Sandwell and West Birmingham Hospitals NHS Trust                      | RXK |          |            |
| 5  | Scarborough and North East Yorkshire Healthcare NHS Trust             | RCC | Yes (21) |            |
| 6  | Sheffield Children's NHS Foundation Trust                             | RCU |          |            |
| 7  | Sheffield Teaching Hospitals NHS Foundation Trust                     | RHQ |          |            |
| 8  | Sherwood Forest Hospitals NHS Foundation Trust                        | RK5 |          |            |
| 9  | Shrewsbury and Telford Hospital NHS Trust                             | RXW |          |            |
| 10 | South London NHS Healthcare Trust                                     | RYQ | Yes (22) |            |
| 11 | South Tees Hospitals NHS Foundation Trust                             | RTR |          |            |
| 12 | South Tyneside NHS Foundation Trust                                   | RE9 |          |            |
| 13 | South Warwickshire NHS Foundation Trust                               | RJC |          |            |
| 14 | Southend University Hospital NHS Foundation Trust                     | RAJ |          |            |
| 15 | Southport and Ormskirk Hospital NHS Trust                             | RVY |          |            |
| 16 | St George's University Hospitals NHS Foundation Trust                 | RJ7 | Yes      | 01/02/2015 |
| 17 | St Helens and Knowsley Hospitals NHS Trust                            | RBN |          |            |
| 18 | Stockport NHS Foundation Trust                                        | RWJ |          |            |
| 19 | Surrey and Sussex Healthcare NHS Trust                                | RTP |          |            |
| 20 | Tameside Hospital NHS Foundation Trust                                | RMP |          |            |
| 21 | Taunton and Somerset NHS Foundation Trust                             | RBA |          |            |
| 22 | The Christie NHS Foundation Trust                                     | RBV |          |            |
| 23 | The Clatterbridge Cancer Centre NHS Foundation Trust                  | REN |          |            |
| 24 | The Dudley Group NHS Foundation Trust                                 | RNA |          |            |
| 25 | The Hillingdon Hospitals NHS Foundation Trust                         | RAS | Yes      | 01/04/2011 |
| 26 | The Newcastle Upon Tyne Hospitals NHS Foundation Trust                | RTD |          |            |
| 27 | The Princess Alexandra Hospital NHS Trust                             | RQW |          |            |
| 28 | The Queen Elizabeth Hospital, King's Lynn. NHS Foundation Trust       | RCX | Yes      | 01/02/2011 |
| 29 | The Rotherham NHS Foundation Trust                                    | RFR |          |            |
| 30 | The Royal Bournemouth and Christchurch Hospitals NHS Foundation Trust | RDZ |          |            |
| 31 | The Royal Marsden NHS Foundation Trust                                | RPY |          |            |
| 32 | The Royal Orthopaedic Hospital NHS Foundation Trust                   | RRJ |          |            |
| 33 |                                                                       |     |          |            |
| 34 |                                                                       |     |          |            |
| 35 |                                                                       |     |          |            |
| 36 |                                                                       |     |          |            |
| 37 |                                                                       |     |          |            |
| 38 |                                                                       |     |          |            |
| 39 |                                                                       |     |          |            |
| 40 |                                                                       |     |          |            |
| 41 |                                                                       |     |          |            |
| 42 |                                                                       |     |          |            |
| 43 |                                                                       |     |          |            |
| 44 |                                                                       |     |          |            |
| 45 |                                                                       |     |          |            |
| 46 |                                                                       |     |          |            |
| 47 |                                                                       |     |          |            |

|    |                                                              |     |          |                |
|----|--------------------------------------------------------------|-----|----------|----------------|
| 1  |                                                              |     |          |                |
| 2  |                                                              |     |          |                |
| 3  | The Royal Wolverhampton NHS Trust                            | RL4 | Yes (23) |                |
| 4  | The Walton Centre NHS Foundation Trust                       | RET |          |                |
| 5  | The Whittington Hospital NHS Trust                           | RKE |          |                |
| 6  | Torbay and South Devon NHS Foundation Trust                  | RA9 | Yes (24) |                |
| 7  | Torbay and South Devon NHS Foundation Trust                  | RA9 | Yes (24) |                |
| 8  | Trafford Healthcare NHS Trust                                | RM4 | Yes (25) |                |
| 9  | United Lincolnshire Hospitals NHS Trust                      | RWD |          |                |
| 10 | University College London Hospitals NHS Foundation Trust     | RRV |          |                |
| 11 | University College London Hospitals NHS Foundation Trust     | RRV |          |                |
| 12 | University Hospital Of South Manchester NHS Foundation Trust | RM2 |          |                |
| 13 | University Hospital Southampton NHS Foundation Trust         | RHM |          | Yes 01/10/2011 |
| 14 | University Hospitals Birmingham NHS Foundation Trust         | RRK |          |                |
| 15 | University Hospitals Bristol NHS Foundation Trust            | RA7 |          |                |
| 16 | University Hospitals Bristol NHS Foundation Trust            | RA7 |          |                |
| 17 | University Hospitals Coventry and Warwickshire NHS Trust     | RKB |          |                |
| 18 | University Hospitals Of Leicester NHS Trust                  | RWE |          |                |
| 19 | University Hospitals Of Leicester NHS Trust                  | RWE |          |                |
| 20 | University Hospitals Of Morecambe Bay NHS Foundation Trust   | RTX |          | Yes 01/10/2010 |
| 21 | University Hospitals of North Midlands NHS Trust             | RJE | Yes (26) |                |
| 22 | Walsall Healthcare NHS Trust                                 | RBK |          |                |
| 23 | Warrington and Halton Hospitals NHS Foundation Trust         | RWW |          |                |
| 24 | Warrington and Halton Hospitals NHS Foundation Trust         | RWW |          |                |
| 25 | West Hertfordshire Hospitals NHS Trust                       | RWG |          |                |
| 26 | West Middlesex University Hospital NHS Trust                 | RFW | Yes (27) |                |
| 27 | West Suffolk NHS Foundation Trust                            | RGR |          | Yes 01/12/2011 |
| 28 | Western Sussex Hospitals NHS Foundation Trust                | RYR |          | Yes 01/07/2013 |
| 29 | Western Sussex Hospitals NHS Foundation Trust                | RYR |          | Yes 01/07/2013 |
| 30 | Weston Area Health NHS Trust                                 | RA3 |          |                |
| 31 | Whipps Cross University Hospital NHS Trust                   | RGC | Yes (28) |                |
| 32 | Winchester and Eastleigh Healthcare Trust                    | RN1 | Yes (29) |                |
| 33 | Winchester and Eastleigh Healthcare Trust                    | RN1 | Yes (29) |                |
| 34 | Wirral University Teaching Hospital NHS Foundation Trust     | RBL |          |                |
| 35 | Worcestershire Acute Hospitals NHS Trust                     | RWP |          |                |
| 36 | Wrightington, Wigan and Leigh NHS Foundation Trust           | RRF |          |                |
| 37 | Wye Valley NHS Trust                                         | RLQ | Yes (30) |                |
| 38 | Wye Valley NHS Trust                                         | RLQ | Yes (30) |                |
| 39 | Yeovil District Hospital NHS Foundation Trust                | RA4 |          |                |
| 40 | York Teaching Hospital NHS Foundation Trust                  | RCB | Yes (31) |                |

1. Acquired by Royal Free London NHS FT in 2014
2. Merged with Newham University Hospital NHS Trust and Whipps Cross University Hospital NHS Trust to form Barts Health NHS Trust in 2012
3. Formed from the merger of Barts and the London NHS Trust, Whipps Cross University Hospital NHS Trust and Newham University Hospital NHS Trust in 2012
4. Acquired Trafford Healthcare NHS Trust in Apr 2012
5. Acquired West Middlesex University Hospital NHS Trust in Sep 2015
6. Merged with North West London Hospitals NHS Trust to form London North West Healthcare NHS Trust in 2014
7. Formed by merger of Heatherwood and Wexham Park Hospitals NHS FT and Frimley Park Hospital NHS FT on 1 October 2014
8. Formed by acquisition of Winchester and Eastleigh Healthcare Trust by Basingstoke and North Hampshire NHS FT in Jan 2012
9. Merged with Frimley Park Hospital NHS FT to form Frimley Health NHS FT on 1 October 2014
10. Created in Apr 2012 by a provider split from Isle of Wight NHS PCT (5QT)
11. Acquired Princess Royal University Hospital from South London NHS Healthcare Trust's dissolution in Oct 2013
12. Formed on 1 Oct 2013 by merger of merger of Lewisham Healthcare NHS Trust and Queen Elizabeth Hospital (previously part of South London NHS Healthcare Trust)
13. Formed by merger of Ealing Hospital NHS Trust and North West London Hospitals NHS Trust in 2014
14. Mid Staffordshire NHS FT which ran Stafford hospital dissolved In Nov 2014. Stafford hospital renamed to County Hospital and acquired by newly named University Hospitals of North Midlands NHS Trust
15. Merged with Barts and the London NHS Trust and Whipps Cross University Hospital NHS Trust to form Barts Health NHS Trust in 2012
16. Merged with Ealing Hospital NHS Trust to form London North West Healthcare NHS Trust in 2014
17. Formed from Oxford Radcliffe Hospitals NHS Trust by acquisition of Nuffield Orthopaedic Acute Centre NHS Trust in 2011
18. Acquired Barnet and Chase Farm Hospitals NHS Trust in 2014
19. Acquired by Royal United Hospital Bath NHS FT on 1 Feb 2015
20. Acquired Royal National Hospital For Rheumatic Diseases NHS FT on 1 Feb 2015
21. Acquired by York Teaching Hospital NHS Foundation Trust in Jul 2013
22. Dissolved in Oct 2013

- 1
- 2
- 3 23. Acquired Cannock Chase Hospital when Mid Staffordshire NHS FT dissolved In Nov 2014
- 4 24. Created on 1 Oct 2015 from South Devon Healthcare NHS Foundation Trust merging with Torbay and Southern Devon Health and Care NHS Trust
- 5 (community and social care services)
- 6
- 7 25. Acquired by Central Manchester University Hospitals NHS FT in Apr 2012
- 8 26. Formed from University Hospital Of North Staffordshire NHS Trust taking over Stafford Hospital (now named County Hospital) on 1 Nov 2014. Mid
- 9 Staffordshire NHS FT which ran Stafford hospital dissolved In Nov 2014
- 10
- 11 27. Acquired by Chelsea and Westminster Hospital NHS FT in Sep 2015
- 12
- 13 28. Merged with Newham University Hospital NHS Trust and Barts and the London NHS Trust to form Barts Health NHS Trust in 2012
- 14
- 15 29. Acquired by Basingstoke and North Hampshire NHS FT to form Hampshire Hospitals NHS FT in Jan 2012
- 16 30. Formed from Hereford Hospitals NHS Trust on 1 April 2011 following Herefordshire's health and adult social care providers joining to form an
- 17 integrated provider of acute, community and social care in England
- 18
- 19 31. Acquired Scarborough and North East Yorkshire Healthcare NHS Trust in Jul 2013
- 20
- 21
- 22
- 23
- 24
- 25
- 26
- 27
- 28
- 29
- 30
- 31
- 32
- 33
- 34
- 35
- 36
- 37
- 38
- 39
- 40
- 41
- 42
- 43
- 44
- 45
- 46
- 47

## SENSITIVITY ANALYSES AND ADDITIONAL TABLES

**Table A. Assessment of the impact of not adjusting for missing 2011 delayed transfer of care data.** Abbreviations: CI, confidence interval.

| Delayed transfers of care days per hospital bed | n   | Trust clusters | Coefficient | 95% CI         | p-value |
|-------------------------------------------------|-----|----------------|-------------|----------------|---------|
| Without adjustment for missing 2011 data        | 837 | 148            | -21.9       | -35.5 to -8.4  | 0.002   |
| With adjustment for missing 2011 data           | 837 | 148            | -25.1       | -39.1 to -11.0 | 0.001   |

**Table B. Association of operating margin with outcomes and process measures.** Adjusted regression analyses as per table 3 in the manuscript excluding Trusts that had changed in composition between 2011 and 2016. Abbreviations: A&E, Accident & Emergency; SHMI, Summary Hospital-level Mortality Indicator.

| Outcome                                         | n   | Trust clusters | Coefficient | 95% CI         | p-value |
|-------------------------------------------------|-----|----------------|-------------|----------------|---------|
| Readmission rate (%)                            | 344 | 119            | -0.01       | -0.03 to 0.01  | 0.403   |
| Inpatient satisfaction score (out of 10)        | 706 | 119            | 0.66        | -0.23 to 1.55  | 0.142   |
| A&E 4 hour breach rate (%)                      | 710 | 119            | -0.20       | -0.30 to -0.11 | <0.001  |
| Delayed transfers of care days per hospital bed | 711 | 119            | -29.5       | -44.1 to -14.8 | <0.001  |
| 2 week wait cancer target adherence (%)         | 710 | 119            | 0.05        | 0.00 to 0.10   | 0.042   |
| 62 day cancer treatment target adherence (%)    | 710 | 119            | 0.12        | 0.02 to 0.23   | 0.018   |

1  
2  
3  
4  
5  
6  
7  
8  
9  
10  
11  
12  
13  
14  
15  
16  
17  
18  
19  
20  
21  
22  
23  
24  
25  
26  
27  
28  
29  
30  
31  
32  
33  
34  
35  
36  
37  
38  
39  
40  
41  
42  
43  
44  
45  
46  
47

**Table C. Association of operating margin with outcomes and process measures (summary model for 2011-13).** Operating margin and outcomes were averaged over the 3 years from 2011-13 to form the inputs to the summary model. Readmission rate is not included as data was not available for 2011-13. Abbreviations: A&E, Accident & Emergency; CI, confidence interval.

| <b>Agency spend as a proportion of turnover (%)</b> |             |             |             |             |             |             |
|-----------------------------------------------------|-------------|-------------|-------------|-------------|-------------|-------------|
|                                                     | <b>2011</b> | <b>2012</b> | <b>2013</b> | <b>2014</b> | <b>2015</b> | <b>2016</b> |
| <b>Worst 10%</b>                                    | 3.9         | 3.9         | 4.6         | 6.0         | 8.5         | 9.1         |
| <b>Middle 80%</b>                                   | 2.4         | 2.3         | 2.6         | 3.0         | 4.6         | 5.1         |
| <b>Best 10%</b>                                     | 2.7         | 2.9         | 3.4         | 3.8         | 4.0         | 4.5         |
|                                                     |             |             |             |             |             |             |
| <b>Ratio of worst to best</b>                       | 1.4         | 1.3         | 1.4         | 1.6         | 2.1         | 2.0         |
| <b>Difference (best and worst)</b>                  | 1.2         | 1.0         | 1.2         | 2.2         | 4.5         | 4.6         |



**Table D. Outcomes and process measures in Foundation trusts versus non-foundation trusts.** Excludes trusts that changed in composition or transitioned to Foundation status during the study period. Values are median (IQR). P-value refers to a Kruskal-Wallis equality-of-populations rank test.

|                                                               | Foundation trust    | Non-foundation trust | p-value |
|---------------------------------------------------------------|---------------------|----------------------|---------|
| <b>Readmission rate (%)</b>                                   | 3.5 (3.0 to 3.9)    | 3.7 (3.3 to 4.0)     | <0.001  |
| <b>Inpatient satisfaction score (out of 10)</b>               | 8.0 (7.8 to 8.2)    | 7.8 (7.7 to 8.0)     | <0.001  |
| <b>A&amp;E 4 hour target breach rate (%)</b>                  | 5.4 (4.2 to 7.8)    | 6.9 (4.9 to 10.5)    | <0.001  |
| <b>Delayed transfer of care days per hospital bed</b>         | 6.8 (3.5 to 11.0)   | 7.0 (4.5 to 11.2)    | 0.241   |
| <b>Cancer two week wait target adherence (%)</b>              | 95.5 (94.6 to 96.7) | 94.9 (94.0 to 96.3)  | <0.001  |
| <b>Cancer 62 days to first treatment target adherence (%)</b> | 87.7 (85.4 to 89.7) | 86.2 (82.5 to 88.2)  | <0.001  |

**Tables E1 & E2. Association of operating margin on outcomes and process measures. Association of operating margin with outcomes and process measures.** These estimates are derived from a linear regression with outcome/process measure as the dependent variable and the following independent variables: operating margin, number of beds available and year. Each Trust in each year was treated as a separate observation with standard errors clustered by Trust to account for the non-independence of Trust-level data. Abbreviations: A&E, Accident & Emergency; CI, confidence interval. E1 includes Foundation trusts only. E2 includes non-Foundation trusts only. Trusts that transitioned to Foundation status are excluded in both tables.

**Table E1. Association of operating margin on outcomes and process measures in Foundation trusts.**

| Outcome                                         | n   | Trust clusters | Coefficient | 95% CI          | p-value |
|-------------------------------------------------|-----|----------------|-------------|-----------------|---------|
| Readmission rate (%)                            | 206 | 71             | -0.015      | -0.039 to 0.008 | 0.202   |
| Inpatient satisfaction score (out of 10)        | 429 | 73             | 0.52        | -0.46 to 1.49   | 0.293   |
| A&E 4 hour breach rate (%)                      | 430 | 73             | -0.25       | -0.37 to -0.13  | <0.001  |
| Delayed transfers of care days per hospital bed | 431 | 73             | -21.8       | -40.7 to -2.9   | 0.024   |
| 2 week wait cancer target adherence (%)         | 431 | 73             | 0.05        | -0.01 to 0.10   | 0.083   |
| 62 day cancer treatment target adherence (%)    | 431 | 73             | 0.08        | -0.02 to 0.17   | 0.110   |

**Table E2. Association of operating margin on outcomes and process measures in non-foundation trusts.**

| Outcome                                         | n   | Trust clusters | Coefficient | 95% CI          | p-value |
|-------------------------------------------------|-----|----------------|-------------|-----------------|---------|
| Readmission rate (%)                            | 142 | 51             | 0.004       | -0.023 to 0.032 | 0.751   |
| Inpatient satisfaction score (out of 10)        | 318 | 62             | 1.59        | 0.43 to 2.76    | 0.008   |
| A&E 4 hour breach rate (%)                      | 327 | 62             | -0.23       | -0.39 to -0.07  | 0.005   |
| Delayed transfers of care days per hospital bed | 328 | 62             | -39.2       | -63.3 to -15.1  | 0.002   |
| 2 week wait cancer target adherence (%)         | 324 | 62             | 0.26        | -0.06 to 0.11   | 0.527   |
| 62 day cancer treatment target adherence (%)    | 324 | 62             | 0.22        | 0.05 to 0.38    | 0.010   |



# BMJ Open

## Financial Performance of English NHS Trusts and Variation in Clinical Outcomes: A Longitudinal Observational Study

|                                 |                                                                                                                                                                                                                                                                                                                                                                                                                   |
|---------------------------------|-------------------------------------------------------------------------------------------------------------------------------------------------------------------------------------------------------------------------------------------------------------------------------------------------------------------------------------------------------------------------------------------------------------------|
| Journal:                        | <i>BMJ Open</i>                                                                                                                                                                                                                                                                                                                                                                                                   |
| Manuscript ID                   | bmjopen-2018-021854.R3                                                                                                                                                                                                                                                                                                                                                                                            |
| Article Type:                   | Research                                                                                                                                                                                                                                                                                                                                                                                                          |
| Date Submitted by the Author:   | 24-Oct-2018                                                                                                                                                                                                                                                                                                                                                                                                       |
| Complete List of Authors:       | Nagendran, Myura; Imperial College London, Division of Anaesthetics, Pain Medicine and Intensive Care<br>Kiew, Grace; North West Anglia NHS Foundation Trust<br>Raine, Rosalind; University College London, Department of Applied Health Care<br>Atun, Rifat; Harvard University, Harvard School of Public Health<br>Maruthappu, Mahiben; University College London, Department of Epidemiology and Public Health |
| <b>Primary Subject Heading</b>: | Health services research                                                                                                                                                                                                                                                                                                                                                                                          |
| Secondary Subject Heading:      | Health economics, Health policy                                                                                                                                                                                                                                                                                                                                                                                   |
| Keywords:                       | hospital, finance, outcomes, process measures                                                                                                                                                                                                                                                                                                                                                                     |
|                                 |                                                                                                                                                                                                                                                                                                                                                                                                                   |

SCHOLARONE™  
Manuscripts

# Financial Performance of English NHS Trusts and Variation in Clinical Outcomes: A Longitudinal Observational Study

Myura Nagendran, MRCP, FRCA<sup>1</sup>

Grace Kiew, MB BChir<sup>2</sup>

Rosalind Raine, PhD<sup>3</sup>

Rifat Atun, FRCP<sup>4</sup>

Mahiben Maruthappu, BM BCh<sup>5</sup>

1. Academic Clinical Fellow, Division of Anaesthetics, Pain Medicine and Intensive Care, Imperial College London, UK
2. Foundation Doctor, North West Anglia NHS Foundation Trust, Peterborough, UK
3. Professor, Department of Applied Health Care, University College London, UK
4. Professor, Harvard T.H. Chan School of Public Health, Harvard University, Boston, MA, USA
5. Public Health Registrar, Department of Epidemiology and Public Health, University College London, UK

**Manuscript version:** 3.9

**Date of version:** 24 October 2018

**Corresponding author:** Dr. Mahiben Maruthappu  
Academic Clinical Fellow in Public Health  
Department of Epidemiology and Public Health  
University College London, UK

**E-mail:** [mahiben.maruthappu@nhs.net](mailto:mahiben.maruthappu@nhs.net)

**Phone:** + 44 7535 184 912

## 1 ABSTRACT

### 2 3 4 5 Objectives

6 To examine the association between financial performance as measured by operating margin  
7 (surplus/deficit as a proportion of turnover) and clinical outcomes in English NHS trusts.  
8  
9

### 10 11 Setting

12 Longitudinal, observational study in 149 acute NHS trusts in England between the financial years 2011 and  
13 2016.  
14  
15

### 16 17 Participants

18 Our analysis focused on outcomes at individual NHS Trust-level (composed of one or more acute hospitals).  
19  
20  
21

### 22 23 Primary and secondary outcomes

24 Outcome measures included readmissions, inpatient satisfaction score and the following process measures:  
25 emergency department (A&E) waiting time targets, cancer referral and treatment targets, and delayed  
26 transfers of care.  
27  
28  
29

### 30 31 Results

32 There was a progressive increase in the proportion of trusts in financial deficit: 22% in 2011, 27% in 2012,  
33 28% in 2013, 51% in 2014, 68% in 2015 and 91% in 2016. In linear regression analyses, there was no  
34 significant association between operating margin and clinical outcomes (readmission rate or inpatient  
35 satisfaction score). There was, however, a significant association between operating margin and process  
36 measures (delayed transfers of care, A&E breaches and cancer waiting time targets). Between the best and  
37 worst financially performing Trusts, there was an approximately 2-fold increase in A&E breaches and  
38 delayed transfers of care overall although this variation decreased over the six years. Between the best and  
39 worst performing trusts on cancer targets, the magnitude of difference was smaller (1·16 and 1·15-fold),  
40 although the variation slowly rose during the six years.  
41  
42  
43  
44  
45  
46  
47

### 48 49 Conclusions

50 Operating margins in English NHS trusts progressively worsened during 2011-16, and this change was  
51 associated with poorer performance on several process measures but not with hospital readmissions or  
52 inpatient satisfaction. Significant variation exists between the best and worst financially performing Trusts.  
53 Further research is needed to examine the causal nature of relationships between financial performance,  
54 process measures and outcomes.  
55  
56  
57  
58  
59  
60

## STRENGTHS AND LIMITATIONS

- To our knowledge, one of the first empirical exploratory analyses of the relationship between funding and outcomes in the English NHS
- Operating margin may not be the ideal measure of an organisation's financial position
- The proportion of activity at each Trust which is elective, acute or specialised was not taken into account nor was the percentage of activity subject to a national tariff
- There may be additional unmeasured confounders that have impacted the results
- This observational study is limited to demonstrating associations rather than causal links

## INTRODUCTION

The combination of higher demand due to ageing, growing populations, with more chronic illness and disability, in addition to rising treatment and technology costs, is driving increased health spending in high-income countries.<sup>1</sup> The National Health Service (NHS) in England is introducing policies to address these demands, attempting to contain costs while improving health outcomes. The NHS Five Year Forward View, published in October 2014, set out a strategic vision for sustaining a high-quality, comprehensive health system in England.<sup>2</sup> Specifically, it identified a £22 billion funding gap by 2020/21, based on the current funding trajectory of the NHS, to be met by ambitious efficiency savings of 2-3% annually (given a long-term track-record of 1% each year).

The call for increased efficiency comes in an austere climate, in which individual NHS Trusts are progressively challenged to achieve financial control,<sup>3,4</sup> while responding to high demand, especially in winter months, reported widely in the British media.<sup>5</sup> NHS Improvement, the body responsible for overseeing Trust performance, reported an overall third quarter deficit of £886 million for the 2016-17 financial year, £300 million higher than the planned target.<sup>6</sup> Higher demand for services, with rising emergency attendances and admissions, and delayed transfers of care (DTOCs), have been cited as key reasons for increasing deficit.<sup>7</sup> While control of Trust financial deficits is important for sustainability of the NHS, there are concerns on the adverse impact of worsening financial performance on clinical outcomes and processes,<sup>8</sup> but few studies which have explored this relationship.

We investigated the relationship between operating margin (surplus/deficit as a proportion of turnover) at English NHS Trusts during 2011-16, with outcomes and process measures. We selected performance measures that are commonly used for benchmarking performance of NHS Trusts and that could plausibly be related to quality, namely, hospital readmissions, inpatient satisfaction scores, emergency department waiting time targets, cancer referral and treatment targets, and delayed transfers of care.<sup>9</sup> Lastly, we



1 investigated the variation in outcome and process measures between the financially best and worst  
2  
3 performing Trusts, both overall and over time.  
4  
5  
6  
7  
8  
9  
10  
11  
12  
13  
14  
15  
16  
17  
18  
19  
20  
21  
22  
23  
24  
25  
26  
27  
28  
29  
30  
31  
32  
33  
34  
35  
36  
37  
38  
39  
40  
41  
42  
43  
44  
45  
46  
47  
48  
49  
50  
51  
52  
53  
54  
55  
56  
57  
58  
59  
60

For peer review only

## METHODS

### Data sources and extraction

NHS Hospitals in England are categorised into financially and operationally distinct legal entities known as Trusts, which deliver services on behalf of the NHS. Trusts may be located at multiple sites and can be responsible for one or more hospitals. Well-performing Trusts are able to gain Foundation status, which allows a degree of financial and operational autonomy from the Department of Health. Data was sought for acute NHS Trusts in the 6-year period encompassing the financial years from April 2010 to March 2016.

We obtained financial data for Trusts from the gov.uk open data portal.<sup>10</sup> Where information was lacking for specific Trusts, we sought the original data from the published accounts available on individual Trust websites or from NHS 'The Quarter' reports.<sup>11</sup>

Data on four financial metrics were extracted and examined: first, the retained surplus/deficit for the financial year; second, the turnover for the Trust (calculated as "Revenue from patient care activities" and "Other operating revenue"); third, trust spend on agency staff, and fourth, spend on consultancy. The precise table IDs and sub-codes for extraction are detailed in the online Supplementary Appendix. Only the first two metrics are measures of financial performance. The second two reflect Trust spending choices and we included these as exploratory variables given the public and media interest in rising agency and consultancy spend.

Bed availability for the quarter preceding the end of each financial year was obtained from publicly available NHS England data<sup>12</sup> with occupancy rate calculated as the percentage of beds (as a proportion of total available) occupied on average during that quarter. Teaching status of the trusts was defined dichotomously on the basis of membership of The Association of UK University Hospitals.<sup>13</sup> For each NHS Trust, the postcode of the Trust was extracted and used as a proxy for location to calculate the region of the country in which the trust hospitals were located.

1  
2  
3 This postcode data were matched to the 2015 Indices of Multiple Deprivation (IMD) score.<sup>14</sup> The Office for  
4 National Statistics uses UK census data to generate the IMD score which encompasses census information  
5 from the following domains: income, employment, crime, living environment, health deprivation and  
6 disability, education and skills/training, barriers to housing and services.  
7  
8  
9  
10

11  
12  
13 Using publicly available NHS England datasets, we obtained data on hospital activity in the form of number  
14 of annual admissions per Trust and annual outpatient attendances.<sup>15</sup> Data on last-minute elective operation  
15 cancellations (for non-clinical reasons) and the number of such patients not being treated within 28 days of  
16 such a cancellation were also extracted from publicly available NHS England datasets.<sup>15</sup>  
17  
18  
19  
20  
21  
22  
23

## 24 **Outcome measures**

25  
26 The outcomes we measured consisted of two clinical measures and three process measures that are  
27 commonly used for benchmarking NHS Trusts and have plausible mechanisms for a relation to quality. We  
28 openly acknowledge that there are several other outcomes and process measures which may also relate to  
29 quality and could have been chosen. Our selection was based on a combination of logistical constraints (i.e.  
30 what data was publicly available) and an effort to include measures which are commonly used for  
31 benchmarking trusts and thereby also reported in the mainstream media.<sup>9</sup>  
32  
33  
34  
35  
36  
37  
38  
39  
40

41 The clinical measures were (i) the proportion of discharges readmitted as an emergency within 7 days of  
42 discharge and (ii) annual overall patient satisfaction for each trust using data from the National Adult  
43 Inpatient Survey compiled by the Care Quality Commission.<sup>16</sup> Data on readmissions was only available for  
44 the years 2014-16. The three process measures were: (i) Accident and Emergency (A&E) 4-hour waiting  
45 time breaches (ii) delayed transfers of care from an acute Trust, and (iii) cancer waiting time targets.  
46  
47  
48  
49  
50  
51  
52  
53  
54  
55  
56  
57  
58  
59  
60

1 The first process measure, Accident and Emergency (A&E) 4-hour waiting time breaches, was defined as  
2 the percentage of patient attendances in type 1 departments (major A&E) who waited greater than four  
3 hours from arrival to admission, transfer or discharge.  
4  
5  
6  
7  
8

9 The second process measure, a delayed transfer of care from an acute Trust, was said to occur when a  
10 patient was ready to depart from acute care but was still occupying a bed. These data were extracted as  
11 'total number of bed days attributed to delayed transfers of care' and standardised to number of beds  
12 available in the Trust. Delayed transfer of care data were only available for the latter eight months of the  
13 2011 financial year. To ensure comparability with other years, a 1.5x multiplier was applied for each trust in  
14 this financial year (see online Supplementary Appendix for further details). No other missing data in the  
15 study was imputed.  
16  
17  
18  
19  
20  
21  
22  
23  
24  
25

26 For the third process measure, cancer waiting time targets, we assessed two specific targets (a) the  
27 proportion of patients who received a first consultant appointment within two weeks of urgent referral for  
28 suspected cancer by their General Practitioner (GP) and (b) the proportion of patients who commenced a  
29 first treatment for cancer within 62 days of being urgently referred by their GP.  
30  
31  
32  
33  
34  
35  
36

### 37 **Unit of analysis**

38 Our analysis focused on the outcomes at individual NHS Trust-level (composed of one or more acute  
39 hospitals).  
40  
41  
42  
43  
44

### 45 **Statistical analysis**

46 Our financial metric of interest was the annual Trust operating margin. Similarly to prior literature,<sup>17-19</sup> we  
47 defined operating margin as the retained surplus (or deficit) for the Trust in a financial year divided by the  
48 turnover (turnover being calculated as "Revenue from patient care activities" and "Other operating  
49 revenue"). This value was winsorised to set all outliers beyond the 2.5<sup>th</sup> and 97.5<sup>th</sup> percentiles to the values  
50  
51  
52  
53  
54  
55  
56  
57  
58  
59  
60

1 at these percentiles. We first calculated summary statistics of the operating surplus/deficit and metrics of  
2 trust characteristics, breaking the sample into 4 groups of deciles by Trust margin.  
3  
4  
5

6  
7 As a second step, we compared the variation in process and outcome measures between the financially  
8 best and worst performing trusts as categorised by operating margin decile (highest versus lowest). Third,  
9 we performed multiple linear regression with our outcomes as the dependent variable and the following  
10 independent variables: operating margin, number of beds available and year. Each Trust in each year was  
11 treated as a separate observation with standard errors clustered by Trust to account for the non-  
12 independence of Trust-level data.  
13  
14  
15  
16  
17  
18

19  
20  
21  
22 Fourth, we compared outcomes and process measures between 'struggling' and 'non-struggling' Trusts. For  
23 this purpose, a struggling Trust was defined as either: (i) in financial or quality special measures as of  
24 December 2016 or (ii) a Foundation Trust subject to enforcement actions by Monitor as of September 2016.  
25  
26  
27 Fifth, we investigated the relationships between delayed transfers of care, cancelled elective operations,  
28 agency spend, A&E breaches and operating margin by assessing correlation between these variables over  
29 an early period (2011-12) and a late period (2015-16).  
30  
31  
32  
33  
34  
35  
36

37 We performed sensitivity analyses to assess the impact of (i) adjustment for missing 2011 delayed transfer  
38 of care data and (ii) inclusion of Trusts that had changed in composition during the study period.  
39  
40  
41  
42

43 All reported  $p$ -values are two sided with the statistical significance threshold set to a  $p$ -value of less than  
44 0.05. Given the hypothesis generating nature of this study, no corrections were made for multiple  
45 comparisons. Approximately 1 in every 20 comparisons could be expected to achieve statistical significance  
46 by chance alone. All analyses were performed using STATA statistical software version 12.1 (College  
47 Station, TX). This study had no external funding source.  
48  
49  
50  
51  
52  
53  
54  
55

## 56 Patient involvement

57  
58  
59  
60

1 Patients were not involved in any aspect of the study design, conduct or in the development of the research  
2  
3 question or outcome measures. This study was a retrospective longitudinal observational study of publicly  
4  
5 available Trust-level data and therefore there was no active patient recruitment for data collection or  
6  
7 requirement for ethical approval.  
8  
9  
10  
11  
12  
13  
14  
15  
16  
17  
18  
19  
20  
21  
22  
23  
24  
25  
26  
27  
28  
29  
30  
31  
32  
33  
34  
35  
36  
37  
38  
39  
40  
41  
42  
43  
44  
45  
46  
47  
48  
49  
50  
51  
52  
53  
54  
55  
56  
57  
58  
59  
60

For peer review only

## RESULTS

Over the 6-year period of study, encompassing the financial years from April 2010 to March 2016, there were changes in the composition to 31 of 149 Trusts. These are detailed in the online Supplementary Appendix and took the form of creation of a new Trust, dissolution of an existing Trust, acquisitions of a hospital or entire Trust to another Trust and mergers between Trusts. 13 Trusts (9%) transitioned to Foundation Status during the 6-year study period. Of the remaining 136 Trusts, 63 (42%) were non Foundation Trusts and 73 (49%) were Foundation Trusts.

There was a progressive increase in the proportion of Trusts in deficit over the 6-year study period: 22% in 2011, 27% in 2012, 28% in 2013, 51% in 2014, 68% in 2015 and 91% in 2016. The distribution of average operating surplus/deficit over the study period is displayed in Figure 1. Operating surplus/deficit varied widely across Trusts ranging from -£250 million to £181 million over the six years. Median operating surplus/deficit over the study period was -£3.8 million (IQR -£8.7 million to -£0.7 million, range -£63.1 million to £32.6 million). Median operating margin over the study period was -1.1% (IQR -2.7% to -0.2%, range -42.5% to 4.6%). Median operating margin was higher in teaching Trusts compared to non-Teaching Trusts (-0.5% versus -1.4%,  $p=0.002$ ) and lowest in the Midlands compared to other regions (-2.3% in the Midlands, -1.2% in London, -0.8% in the South, -1.0% in the North;  $p=0.028$ ).

During the 6-year study period, there was a nationwide decline in overnight general and acute beds from 110,568 to 103,422 (6.5% reduction) with a concomitant increase in day only beds from 11,572 to 12,207 (5.5% increase).

Trust metrics are shown in Table 1 stratified by decile of operating margin. Between the best and worst financially performing Trusts, there was an approximately 1.75-fold and 2-fold increase in agency and consultancy spend respectively as a proportion of turnover. The best financially performing Trusts also had a 1.5-fold higher annual number of outpatient attendances. In contrast, the annual number of admissions,

1 bed occupancy rates, local deprivation scores and proportion of Foundation Trusts were broadly similar  
2  
3 between the best and worst performing Trusts. The proportion of Trusts with teaching status increased  
4  
5 throughout deciles of operating margin. Trends in the variation of operating margin over time with clinical  
6  
7 outcomes and process measures are displayed in figures 2 and 3 respectively.  
8  
9

10  
11 Clinical outcomes and process measures, stratified by decile of operating margin, are shown in table 2.  
12  
13 Between the best and worst financially performing Trusts, there was an approximately 2-fold increase in  
14  
15 A&E breach rates and delayed transfers of care. In contrast, despite significant differences between the best  
16  
17 and worst performing trusts on cancer targets, the magnitude of difference was smaller (both approximately  
18  
19 1.15-fold).  
20  
21

22  
23  
24 Trends in the variation between the best and worst financially performing Trusts over time for both clinical  
25  
26 outcomes and process measures are shown in table 3. There was no appreciable variation in readmission  
27  
28 rate or inpatient satisfaction score with the latter increasing over time at a slightly faster rate in the worst  
29  
30 financially performing Trusts.  
31  
32

33  
34  
35 Performance on process measures in both the best and worst financially performing Trusts deteriorated  
36  
37 over time (table 3). However, variation between the best and worst groups narrowed for A&E breaches,  
38  
39 returned to baseline for delayed transfers of care after an initial rise, and rose slowly for both cancer target  
40  
41 breaches. The variation in agency spend as a proportion of turnover between the best and worst financially  
42  
43 performing trusts increased substantially between 2011 (best 2.7% and worst 3.9%, difference 1.2%) and  
44  
45 2016 (best 4.5% and worst 9.1%, difference 4.6%) (see table A in online Supplementary Appendix).  
46  
47  
48

49  
50 In our linear regression analyses, there was no significant association between operating margin and clinical  
51  
52 outcomes (readmission rate or inpatient satisfaction score; table 4). There was, however, a significant  
53  
54 association between operating margin and process measures (delayed transfers of care, A&E breaches and  
55  
56 cancer waiting time targets; table 4). Trusts defined as struggling (i.e. in special measures or subject to  
57  
58  
59



1 enforcement action) were associated with worse performance on all process measures but not with  
2 readmission rate or inpatient satisfaction scores (table 5). Foundation Trusts were associated with better  
3 performance on clinical outcomes and all process measures except delayed transfers of care (see table B in  
4 online Supplementary Appendix). Broadly speaking, the associations between operating margins and  
5 outcomes/process measures were not as strong for Foundation Trusts as non-Foundation Trusts (see  
6 tables C1 & C2 in online Supplementary Appendix).  
7  
8  
9  
10  
11  
12  
13  
14  
15

16 The associations between delayed transfers of care, elective surgery cancellations, agency spend, A&E  
17 breaches and operating margins are displayed in a correlation matrix for the early years (2011 and 2012;  
18 figure 4) and the later years (2015 and 2016; figure 5) of the six year study period (same scale applied to  
19 both figures 4 and 5). There was weak positive correlation between all factors except operating margin for  
20 which there was weak negative correlation with the other measures. These associations were maintained in  
21 the later years though with a greater spread among trusts.  
22  
23  
24  
25  
26  
27  
28  
29

30 Sensitivity analyses are reported in the online Supplementary Appendix. There was no change to the results  
31 with and without adjustment for missing 2011 delayed transfer of care data (Table D in online  
32 Supplementary Appendix). There was no change to the results when excluding Trusts that had changed in  
33 composition over the study period (Table E in online Supplementary Appendix).  
34  
35  
36  
37  
38  
39  
40  
41  
42  
43  
44  
45  
46  
47  
48  
49  
50  
51  
52  
53  
54  
55  
56  
57  
58  
59  
60

## DISCUSSION

### Principal findings

Our study has a number of important findings. First, in the period 2011-16, there was a substantial increase in the proportion of NHS Trusts with negative operating margins. Second, the overall variation between the best and worst financially performing Trusts was larger for A&E breach rates and delayed transfers of care than for cancer targets. Third, the variation over time between the best and worst financially performing trusts was static for clinical outcomes and mixed for process measures (decreased over the six years for A&E breaches, was static for delayed transfers of care while increasing slightly for cancer targets). Fourth, there was a significant association between worsened operating margin and deteriorating process measures (four-hour A&E targets, cancer waiting time targets and delayed transfers of care), but not between operating margin and either readmission rates or inpatient satisfaction scores.

### Comparison with other studies

The extant literature on the association between financial performance and outcomes comes primarily from the United States (US) and is mixed in pronouncement. Volpp and colleagues assessed the impact of a budget act reducing Medicare reimbursements on processes of care for acute myocardial infarction (MI).<sup>20</sup> They found that while the budget act added moderate financial strain to organisations, there was no appreciable worsening of care with respect to MI processes of care or mortality in 236,506 patients from 208 hospitals. An analysis by Bazzoli and colleagues in 2008 concluded that while there may be an association between some measures of financial performance and adverse events, it was much weaker than previously reported by Encinosa and Bernard who found a concerning association between frequency of patient safety alerts and operating margin.<sup>17,18</sup> Further, a study by Ly and colleagues in over 3,000 US hospitals found that low hospital margins were associated with worse processes of care and higher readmissions, although not with higher mortality.<sup>21</sup>

1 Placing our findings in the context of earlier studies requires extreme caution given the differences between  
2 the US and UK health systems. Specifically, Ly et al. excluded public hospitals (which comprise the vast  
3 majority of English hospitals) from their analysis. However, these prior studies do highlight the difficulty in  
4 disentangling the relationship between financial performance and outcomes. Meanwhile, a large European  
5 cohort study revealed that attempts to save money by cutting nurse to patient ratios may adversely affect  
6 patient outcomes.<sup>22</sup> An increase in a nurses' workload by one patient increased the likelihood of a 30-day  
7 inpatient death by 7% (odds ratio 1.07, 95% CI 1.03 to 1.11).<sup>22</sup>

### 17 **Study limitations**

18 Our findings must be borne in light of several study limitations. First, while we had access to a considerable  
19 volume of data, the granularity of data was limited. For example, our unit of analysis was at the Trust level,  
20 giving a sample size of approximately 149 compared to equivalent US studies that have analysed over 3000  
21 hospitals.<sup>21</sup> Lack of 'high-frequency' data also prevented us performing interrupted time-series and time-lag  
22 analyses.

23  
24  
25  
26  
27  
28  
29  
30  
31  
32  
33 Second, it may be that operating margin is not the ideal measure of an organisation's financial position. A  
34 Trust's deficit may be exaggerated if it realises that a deficit is unavoidable and careful accounting allows for  
35 a larger than necessary deficit in one year to ensure a small surplus in the following year (as opposed to two  
36 years of deficit); potential gamification.<sup>23</sup> Organisations including NHS Improvement and the Department of  
37 Health typically use breakeven performance figures instead of operating surplus/deficits. We chose not to  
38 use such figures as the data were not easily available at Trust level for much of the period under  
39 investigation.

40  
41  
42  
43  
44  
45  
46  
47  
48  
49 Third, we utilised only a small selection of existing clinical outcomes and process. This decision was driven  
50 by two factors. Logistically, there is limited public access to many clinical outcomes. While there is access to  
51 many process measures, we opted for a small selection that is commonly used for benchmarking trusts (i.e.  
52 often quoted in media reports and receive major public scrutiny) so as to avoid the issues of multiple

1 comparisons. It is entirely possible that other process measures may well display differing relationships with  
2  
3 respect to operating margins.  
4  
5  
6

7 Fourth, we did not take into account the proportion of activity at each Trust which is elective, acute or  
8 specialised nor did we assess the percentage of activity subject to a national tariff. Work from the Health  
9 Foundation in 2016 suggests a link between financial performance and the proportion of Trust income  
10 arising from activities subject to the national tariff.<sup>24</sup> Reimbursement prices for specialist activity tend to be  
11 higher than average treatment costs. Furthermore, best practice tariffs tend to reward more efficient  
12 treatment delivery such as an increased proportion of day cases. Although there is likely to be correlation  
13 between teaching hospital status (which we did assess) and the share of activity subject to a specialised  
14 services tariff, this is nonetheless a crude proxy.  
15  
16  
17  
18  
19  
20  
21  
22  
23  
24  
25

26 Fifth, there may be additional unmeasured confounders that have impacted on our results. For example,  
27 surrounding Primary Care systems may impact on the efficiency with which the acute Trusts function. Or  
28 alternatively, competition from independent sector treatment centres (ISTCs) may lead to a loss of revenue  
29 and market share for some Trusts, who may then need to invest more of their operating funds in attracting  
30 patients, especially given an increasing emphasis on patient choice and the freedom for patients to select  
31 hospitals by publicly reported outcomes. We adjusted for hospital size in the form of number of beds as well  
32 as using operating margin as a more standardised measure of financial performance than gross surplus or  
33 deficit (as turnover showed wide variation between trusts). Trusts that treat greater volumes of patients may  
34 benefit from economies of scale. However, as with any observational research, we cannot fully discount the  
35 impact of confounding on our results. For example, financial underperformance may be a signal of general  
36 underperformance in a Trust where clinical and other functions that might be suboptimal affect outcomes.  
37  
38  
39  
40  
41  
42  
43  
44  
45  
46  
47  
48

49 Sixth, we are limited to demonstrating associations rather than causal links.  
50  
51  
52  
53

## 54 **Conclusions and policy implications**

55  
56  
57  
58  
59  
60

1 Notwithstanding limitations, our findings have important ramifications for clinical leads, managers and policy  
2 makers. The relationship between financial performance and clinical outcomes is far more complex and  
3 associated with myriad other factors which will vary among Trusts. This is highlighted in a 2017 briefing from  
4 the Nuffield Trust which discusses the current financial health of Trusts and attempts to predict what is likely  
5 to occur in the coming years.<sup>23</sup> Trusts with financial deficits may be spending more than they can afford (for  
6 example, on extra nursing staff) and one could therefore argue that higher quality should be expected for  
7 this extra financial outlay. Conversely, the existence of such deficit might instead indicate reduced efficiency  
8 and challenged management. Alternatively, financial penalties due to poor clinical performance or financial  
9 management could exacerbate deficits. For example, marginal rate payment reductions for emergency  
10 admissions, penalties for readmissions and withholding payment for cases resulting in never events.  
11 Attempts to redress this balance may inadvertently lead to reflex spending cuts and poorer quality care. The  
12 role of clinical leads, management and leadership within a Trust is likely to be a key contributor to how  
13 financial deficits impact quality of care. For example, cutting down on management personnel to save costs  
14 may result in worse productivity if clinicians have to allocate more time to administrative activities and away  
15 from revenue producing clinical activities. In this regard, it is interesting that the associations between  
16 operating margins and outcomes/process measures were not as strong for Foundation versus non-  
17 Foundation Trusts. It may be that an earlier move to new reimbursement and funding models exposed  
18 Foundation Trusts to financial stress that inoculated them to some extent against later financial pressures.  
19  
20  
21  
22  
23  
24  
25  
26  
27  
28  
29  
30  
31  
32  
33  
34  
35  
36  
37  
38  
39  
40  
41 There are a number of specific points to consider also. First, there is substantial variation between Trusts,  
42 which in some cases is worsening. Between the best and worst financially performing Trusts, there are up-to  
43 2-fold differences in agency spend, delayed transfers of care, A&E breaches and cancer waiting times. This  
44 is notable and needs to be explicitly tackled with greater efficacy. While national regulators such as the Care  
45 Quality Commission (CQC) and NHS Improvement do seek to support challenged Trusts, the effectiveness  
46 of this has not necessarily translated into improved performance metrics. An argument could also be made  
47 that although the magnitude of difference in cancer targets was smaller than for A&E breaches, there may  
48  
49  
50  
51  
52  
53  
54  
55  
56  
57  
58  
59  
60

1 be greater concern from even small increases in cancer waiting times compared to A&E breaches which  
2  
3 include less severe illnesses.  
4  
5  
6

7 Second, the lack of significant association between operating margin and either readmissions or inpatient  
8  
9 satisfaction may suggest that clinical outcomes are more resilient to financial pressures than process  
10  
11 measures, or that the driver for such clinical metrics is not predominantly financial-based. Third, the recent  
12  
13 narrowing of variation between the best and worst performing Trusts on the measures of A&E targets and  
14  
15 delayed transfers of care, may be a cause for concern, suggesting that now even the best financially  
16  
17 performing Trusts are struggling to manage demand. This indicates that a more system-wide approach to  
18  
19 demand-management and improving Trust performance may be required to address the identified  
20  
21 deteriorations, given the entire Trust cohort is now showing signs of deterioration. Stated plainly, it seems  
22  
23 that even if best practice is adopted from the most well managed Trusts, demands on secondary and tertiary  
24  
25 care may not be adequately addressed.  
26  
27  
28  
29

30 Finally, studies assessing the micro level spending decisions by Trusts when confronted by financial  
31  
32 pressures may lend more insight into the causal pathway and suggest appropriate targets for intervention  
33  
34 (see figure A in in online Supplementary Appendix).  
35  
36  
37  
38

### 39 **Summary**

40  
41 Notwithstanding limitations, our results demonstrate that operating margins at English NHS Trusts have  
42  
43 progressively worsened over 2011-16, and that this change correlates with poorer Trust performance on a  
44  
45 range of widely benchmarked process measures, but not significantly with readmissions or inpatient  
46  
47 satisfaction. The variation between the best and worst financially performing Trusts was larger for A&E  
48  
49 breach rates and delayed transfers of care than for cancer targets but showed differing patterns of variation  
50  
51 over time. The causal nature of relationships between financial performance, process measures and  
52  
53 outcomes remains difficult to disentangle.  
54  
55  
56  
57  
58  
59  
60

## **COMPETING INTERESTS STATEMENT**

All authors have completed the ICMJE uniform disclosure at [ww.icmje.org/coi\\_disclosure.pdf](http://www.icmje.org/coi_disclosure.pdf). Mahiben Maruthappu serves as NHS England's Innovation Adviser and is a co-founder of Cera, a technology-enabled homecare provider. All authors declare no support from any organisation for the submitted work, no financial relationships with any organisations that might have an interest in the submitted work in the previous three years and no other relationships or activities that could appear to have influenced the submitted work.

## **CONTRIBUTORSHIP**

MN and MM conceived the study. RR and RA had critical input into study direction and interpretation. MN and GK extracted and sorted data for the study. MN performed the analysis and wrote the first draft of the manuscript. All authors (MN, GK, RR, RA, MM) contributed to critical revision of the manuscript for important intellectual content and approved the final version. MN and MM are the guarantors.

## **ACKNOWLEDGEMENTS**

BMJ Open Peer Reviewers whose suggestions have been incorporated into the manuscript.

## **FUNDING**

No specific funding for this study.

## **SPONSOR**

No sponsor for this study.

## DATA SHARING

Raw data and analysis available on request from authors.

## TRANSPARENCY STATEMENT

The study guarantors (MN and MM) affirm that the manuscript is an honest, accurate, and transparent account of the study being reported; that no important aspects of the study have been omitted; and that any discrepancies from the study as planned have been explained.

## ETHICS

No ethical approval required as retrospective longitudinal observational study of publicly available Trust-level data.



**REFERENCES**

1. Lorenzoni L, Belloni A, Sassi F. Health-care expenditure and health policy in the USA versus other high-spending OECD countries. *Lancet* 2014; 384(9937): 83-92.
2. NHS. Five Year Forward View, 2014. Available online at: <http://www.england.nhs.uk/wp-content/uploads/2014/10/5yfv-web.pdf> (last accessed 29 August 2017).
3. Gulland A. NHS chief warns of more financial challenges. *BMJ* 2017; 356: J212.
4. NHS Improvement. 10 ways for NHS providers to find savings and make cost improvements. 2016. Available online at: [https://improvement.nhs.uk/uploads/documents/FIP\\_-\\_where\\_to\\_look\\_to\\_make\\_NHS\\_savings.pdf](https://improvement.nhs.uk/uploads/documents/FIP_-_where_to_look_to_make_NHS_savings.pdf) (last accessed 29 August 2017).
5. Campbell D, Morris S, Marsh S. NHS faces 'humanitarian crisis' as demand rises, British Red Cross warns. 2017. Available online at: <https://www.theguardian.com/society/2017/jan/06/nhs-faces-humanitarian-crisis-rising-demand-british-red-cross> (last accessed 29 August 2017).
6. NHS Improvement. Quarterly performance of the NHS provider sector: quarter 3 2016/17. 2017. Available online at: <https://improvement.nhs.uk/resources/quarterly-performance-nhs-provider-sector-quarter-3-1617/> (last accessed 29 August 2017).
7. NHS England. NHS England Business Plan. 2016. Available online at: <https://www.england.nhs.uk/wp-content/uploads/2016/03/bus-plan-16.pdf> (last accessed 29 August 2017).
8. Hopson C. We need to be honest and realistic about what is deliverable at the NHS front line. 2017. Available online at: <http://blogs.bmj.com/bmj/2017/01/29/chris-hopson-we-need-to-be-honest-and-realistic-about-what-is-deliverable-at-the-nhs-front-line/> (last accessed 29 August 2017).
9. QualityWatch. Indicators. Available online at: <http://www.qualitywatch.org.uk/indicators-results> (last accessed 7 May 2018).
10. Gov.uk. NHS trusts accounts data for 2015 to 2016. 2016. Available online at: <https://www.gov.uk/government/publications/nhs-trusts-accounts-data-for-2015-to-2016> (last accessed 29 August 2017).
11. Gov.uk. The Quarter, quarter 4 2010/11. 2011. Available online at: <https://www.gov.uk/government/publications/the-quarter-quarter-4-2010-11> (last accessed 29 August 2017).
12. NHS England. Bed Availability and Occupancy. 2017. Available online at: <https://www.england.nhs.uk/statistics/statistical-work-areas/bed-availability-and-occupancy/> (last accessed 29 August 2017).
13. Association of UK University Hospital Trusts. List of AUKUH Members. 2016. Available online at: <http://www.aukuh.org.uk/index.php/members/aukuh-members> (last accessed 29 August 2017).
14. Gov.uk. English indices of deprivation 2015. 2015. Available online at: <https://www.gov.uk/government/statistics/english-indices-of-deprivation-2015> (last accessed 29 August 2017).

- 1 15. NHS England. Statistical Work Areas. 2017. Available online at:  
2 <https://www.england.nhs.uk/statistics/statistical-work-areas/> (last accessed 29 August 2017).
- 3  
4 16. NHS Surveys. Current surveys. 2017. Available online at: <http://www.nhssurveys.org/surveys> (last  
5 accessed 29 August 2017).
- 6  
7 17. Bazzoli GJ, Chen HF, Zhao M, Lindrooth RC. Hospital financial condition and the quality of patient  
8 care. *Health Econ* 2008; 17(8): 977-95.
- 9  
10 18. Encinosa WE, Bernard DM. Hospital finances and patient safety outcomes. *Inquiry* 2005; 42(1): 60-  
11 72.
- 12  
13 19. Joynt KE, Orav EJ, Jha AK. Association between hospital conversions to for-profit status and clinical  
14 and economic outcomes. *JAMA* 2014; 312(16): 1644-52.
- 15  
16 20. Volpp KG, Konetzka RT, Zhu J, Parsons L, Peterson E. Effect of cuts in Medicare reimbursement on  
17 process and outcome of care for acute myocardial infarction patients. *Circulation* 2005; 112(15): 2268-75.
- 18  
19 21. Ly DP, Jha AK, Epstein AM. The association between hospital margins, quality of care, and closure  
20 or other change in operating status. *J Gen Intern Med* 2011; 26(11): 1291-6.
- 21  
22 22. Aiken LH, Sloane DM, Bruyneel L, et al. Nurse staffing and education and hospital mortality in nine  
23 European countries: a retrospective observational study. *Lancet* 2014; 383(9931): 1824-30.
- 24  
25 23. Gainsbury S. The bottom line. Understanding the NHS deficit and why it won't go away: The Nuffield  
26 Trust, 2017. Available online at: [https://www.nuffieldtrust.org.uk/research/the-bottom-line-understanding-the-  
27 nhs-deficit-and-why-it-won-t-go-away](https://www.nuffieldtrust.org.uk/research/the-bottom-line-understanding-the-nhs-deficit-and-why-it-won-t-go-away) (last accessed 4 October 2018).
- 28  
29 24. The Health Foundation. System-wide problems driving NHS deficit. 2016. Available online at:  
30 <http://www.health.org.uk/news/system-wide-problems-driving-nhs-deficit> (last accessed 29 August 2017).
- 31  
32  
33  
34  
35  
36  
37  
38  
39  
40  
41  
42  
43  
44  
45  
46  
47  
48  
49  
50  
51  
52  
53  
54  
55  
56  
57  
58  
59  
60

## FIGURE LEGENDS

**Figure 1. Distribution of average operating surplus/deficit over the 2011-16 period.**

**Figure 2. Trends in operating margin and clinical outcomes over time.**

**Figure 3. Trends in operating margin and process measures over time.** Abbreviations: A&E, Accident & Emergency.

**Figure 4. 2011-12 correlation between delayed transfers of care, elective operation cancellations, agency spend, A&E breaches and operating margin.** Elective surgery cancellations are last-minute elective operation cancellations (for non-clinical reasons) standardised in this figure to number of available beds at the Trust (as a proxy for hospital capacity). Agency spend is displayed as a proportion of turnover. Operating margin is as defined in study methods. Abbreviations: A&E, Accident & Emergency; DTOC, delayed transfer of care.

**Figure 5. 2015-16 correlation between delayed transfers of care, elective operation cancellations, agency spend, A&E breaches and operating margin.** Elective surgery cancellations are last-minute elective operation cancellations (for non-clinical reasons) standardised in this figure to number of available beds at the Trust (as a proxy for hospital capacity). Agency spend is displayed as a proportion of turnover. Operating margin is as defined in study methods. Abbreviations: A&E, Accident & Emergency; DTOC, delayed transfer of care.

## TABLE LEGENDS

**Table 1. Trust metrics by decile of Trust operating margin.** Higher deprivation score indicates more deprivation.

**Table 2. Outcomes and process measures by decile of Trust operating margin.** Values are median (IQR). P-value refers to a one-way analysis of variance (ANOVA) test. Abbreviations: A&E, Accident & Emergency.

**Table 3. Variation in outcomes and process measures over time by Trust financial performance.** 'Best 10%' refers to Trusts with operating margins in the top 10% of the sample. 'Worst 10%' refers to Trusts with operating margins in the bottom 10% of the sample.

**Table 4. Association of operating margin with outcomes and process measures.** These estimates are derived from a linear regression with outcome/process measure as the dependent variable and the following independent variables: operating margin, number of beds available and year. Each Trust in each year was treated as a separate observation with standard errors clustered by Trust to account for the non-independence of Trust-level data. Abbreviations: A&E, Accident & Emergency; CI, confidence interval.

**Table 5. Outcomes and process measures in trusts struggling (i.e. in special measures or subject to enforcement action) versus those that are not.** Values are median (IQR). P-value refers to a Kruskal-Wallis equality-of-populations rank test.

Table 1. Trust metrics by decile of Trust operating margin.

|                                                                 | Operating margin       |                      |                     |                   |
|-----------------------------------------------------------------|------------------------|----------------------|---------------------|-------------------|
|                                                                 | Bottom 10%             | 11-50%               | 51-89%              | Top 10%           |
| <b>Operating surplus / deficit (£ millions, median (range))</b> | -30.9 (-61.1 to -12.4) | -6.3 (-63.1 to -1.2) | -1.5 (-13.8 to 6.8) | 5.4 (1.3 to 32.6) |
| <b>Agency spend as proportion of turnover (%)</b>               | 6.9 (2.0)              | 4.8 (2.4)            | 3.8 (2.0)           | 3.9 (1.2)         |
| <b>Consultancy spend as proportion of turnover (%)</b>          | 0.96 (0.54)            | 0.44 (0.35)          | 0.45 (0.74)         | 0.46 (0.29)       |
| <b>Annual admissions, mean (SD)</b>                             | 26,978 (9,698)         | 29,006 (13,326)      | 36,411 (21,300)     | 30,445 (12,455)   |
| <b>Annual outpatient attendances, mean (SD)</b>                 | 271,508 (109,938)      | 295,223 (142,784)    | 374,266 (210,861)   | 407,595 (209,956) |
| <b>Bed availability, mean (SD)</b>                              | 716 (267)              | 718 (321)            | 822 (387)           | 740 (226)         |
| <b>Bed occupancy (%)</b>                                        | 90.1                   | 88.3                 | 87.2                | 88.1              |
| <b>Deprivation score, mean (SD)</b>                             | 23.4 (11.8)            | 19.2 (13.2)          | 23.3 (14.6)         | 23.5 (11.9)       |
| <b>Teaching trust (%)</b>                                       | 6.7                    | 17.0                 | 33.3                | 35.7              |
| <b>Foundation status (%)</b>                                    |                        |                      |                     |                   |
| Non-foundation trust                                            | 40.0                   | 49.2                 | 35.0                | 42.9              |
| Foundation trust                                                | 53.3                   | 47.5                 | 50.0                | 50.0              |
| Transitioned to Foundation                                      | 6.7                    | 3.4                  | 15.0                | 7.1               |
| <b>Region (%)</b>                                               |                        |                      |                     |                   |
| London                                                          | 20                     | 17                   | 17                  | 21                |
| South                                                           | 20                     | 17                   | 38                  | 7                 |
| Midlands                                                        | 40                     | 36                   | 15                  | 29                |
| North                                                           | 20                     | 31                   | 30                  | 43                |

**Table 2. Outcomes/process measures by decile of Trust operating margin.**

|                                                               | Operating margin    |                     |                     |                     | p-value |
|---------------------------------------------------------------|---------------------|---------------------|---------------------|---------------------|---------|
|                                                               | Bottom 10%          | 11-50%              | 51-89%              | Top 10%             |         |
| <b>Readmission rate (%)</b>                                   | 3.6 (3.4 to 3.9)    | 3.6 (3.1 to 3.9)    | 3.7 (3.2 to 4.0)    | 3.3 (3.0 to 3.8)    | 0.137   |
| <b>Inpatient satisfaction score (out of 10)</b>               | 8.0 (7.8 to 8.2)    | 8.0 (7.8 to 8.2)    | 7.9 (7.7 to 8.1)    | 7.9 (7.7 to 8.2)    | <0.001  |
| <b>4 hour A&amp;E target breach rate (%)</b>                  | 10.2 (6.7 to 15.1)  | 6.7 (4.9 to 10.7)   | 5.3 (4.2 to 7.3)    | 5.3 (3.9 to 6.7)    | <0.001  |
| <b>Delayed transfer of care days per hospital bed</b>         | 11.1 (6.0 to 17.1)  | 7.4 (4.5 to 10.9)   | 6.5 (3.7 to 11.0)   | 5.7 (2.6 to 8.1)    | <0.001  |
| <b>Cancer two week wait target adherence (%)</b>              | 94.9 (93.2 to 96.2) | 95.5 (94.2 to 96.7) | 95.4 (94.4 to 96.7) | 95.6 (95.0 to 96.5) | 0.009   |
| <b>Cancer 62 days to first treatment target adherence (%)</b> | 86.2 (81.9 to 88.2) | 86.6 (83.6 to 89.1) | 87.6 (85.6 to 89.6) | 88.0 (86.3 to 89.9) | <0.001  |

Table 3. Variation in outcomes and process measures over time by Trust financial performance.

| Readmissions (%)                                  |       |       |       |       |       |       |
|---------------------------------------------------|-------|-------|-------|-------|-------|-------|
|                                                   | 2011  | 2012  | 2013  | 2014  | 2015  | 2016  |
| <b>Worst 10%</b>                                  | -     | -     | -     | 3·6   | 3·7   | 3·8   |
| <b>Middle 80%</b>                                 | -     | -     | -     | 3·4   | 3·6   | 3·6   |
| <b>Best 10%</b>                                   | -     | -     | -     | 3·4   | 3·5   | 3·6   |
| <b>Ratio of worst to best</b>                     | -     | -     | -     | 1·1   | 1·0   | 1·1   |
| <b>Difference (best and worst)</b>                | -     | -     | -     | 0·2   | 0·1   | 0·2   |
| Inpatient satisfaction survey (score out of 10)   |       |       |       |       |       |       |
|                                                   | 2011  | 2012  | 2013  | 2014  | 2015  | 2016  |
| <b>Worst 10%</b>                                  | 7·5   | 7·7   | 7·9   | 7·9   | 8·0   | 8·0   |
| <b>Middle 80%</b>                                 | 7·7   | 7·8   | 7·9   | 8·0   | 8·1   | 8·1   |
| <b>Best 10%</b>                                   | 7·8   | 7·8   | 7·9   | 8·0   | 8·1   | 8·1   |
| <b>Ratio of worst to best</b>                     | 1·0   | 1·0   | 1·0   | 1·0   | 1·0   | 1·0   |
| <b>Difference (best and worst)</b>                | 0·3   | 0·1   | 0·0   | 0·1   | 0·1   | 0·1   |
| Accident & Emergency breach rate (%)              |       |       |       |       |       |       |
|                                                   | 2011  | 2012  | 2013  | 2014  | 2015  | 2016  |
| <b>Worst 10%</b>                                  | 8·2   | 6·4   | 7·8   | 7·8   | 11·9  | 13·6  |
| <b>Middle 80%</b>                                 | 5·2   | 4·9   | 6·0   | 6·3   | 9·3   | 12·0  |
| <b>Best 10%</b>                                   | 4·2   | 4·5   | 5·5   | 5·9   | 7·5   | 10·4  |
| <b>Ratio of worst to best</b>                     | 2·0   | 1·4   | 1·4   | 1·3   | 1·6   | 1·3   |
| <b>Difference (best and worst)</b>                | 4·0   | 1·9   | 2·3   | 1·9   | 4·4   | 3·2   |
| Delayed transfers of care days                    |       |       |       |       |       |       |
|                                                   | 2011  | 2012  | 2013  | 2014  | 2015  | 2016  |
| <b>Worst 10%</b>                                  | 5,077 | 6,657 | 7,248 | 6,972 | 7,813 | 8,284 |
| <b>Middle 80%</b>                                 | 4,851 | 5,082 | 5,558 | 6,046 | 7,311 | 8,044 |
| <b>Best 10%</b>                                   | 3,850 | 3,722 | 3,884 | 3,932 | 5,712 | 6,477 |
| <b>Ratio of worst to best</b>                     | 1·3   | 1·8   | 1·9   | 1·8   | 1·4   | 1·3   |
| <b>Difference (best and worst)</b>                | 1,227 | 2,935 | 3,364 | 3,040 | 2,101 | 1,807 |
| Cancer two week wait target breach rate (%)       |       |       |       |       |       |       |
|                                                   | 2011  | 2012  | 2013  | 2014  | 2015  | 2016  |
| <b>Worst 10%</b>                                  | 4·2   | 4·2   | 4·6   | 4·8   | 6·2   | 5·9   |
| <b>Middle 80%</b>                                 | 4·3   | 3·9   | 4·3   | 4·4   | 5·7   | 5·5   |
| <b>Best 10%</b>                                   | 4·6   | 4·1   | 4·0   | 4·6   | 5·9   | 5·2   |
| <b>Ratio of worst to best</b>                     | 0·9   | 1·0   | 1·2   | 1·0   | 1·1   | 1·1   |
| <b>Difference (best and worst)</b>                | -0·4  | 0·1   | 0·6   | 0·2   | 0·3   | 0·7   |
| Cancer 62 days to first treatment breach rate (%) |       |       |       |       |       |       |
|                                                   | 2011  | 2012  | 2013  | 2014  | 2015  | 2016  |
| <b>Worst 10%</b>                                  | 11·9  | 11·7  | 12·2  | 13·7  | 16·6  | 18·3  |
| <b>Middle 80%</b>                                 | 12·1  | 12·0  | 12·2  | 13·4  | 15·6  | 16·2  |

|                                    |      |      |      |      |      |      |
|------------------------------------|------|------|------|------|------|------|
| <b>Best 10%</b>                    | 11.9 | 11.7 | 10.0 | 11.7 | 13.5 | 15.2 |
| <b>Ratio of worst to best</b>      | 1.0  | 1.0  | 1.2  | 1.2  | 1.2  | 1.2  |
| <b>Difference (best and worst)</b> | 0.0  | 0.0  | 2.2  | 2.0  | 3.1  | 3.1  |

**Table 4. Association of operating margin on outcomes and process measures.**

| <b>Outcome</b>                                         | <b>n</b> | <b>Trust clusters</b> | <b>Coefficient</b> | <b>95% CI</b>   | <b>p-value</b> |
|--------------------------------------------------------|----------|-----------------------|--------------------|-----------------|----------------|
| <b>Readmission rate (%)</b>                            | 387      | 135                   | -0.012             | -0.029 to 0.005 | 0.164          |
| <b>Inpatient satisfaction score (out of 10)</b>        | 825      | 148                   | 0.80               | -0.06 to 1.67   | 0.067          |
| <b>A&amp;E 4 hour breach rate (%)</b>                  | 835      | 148                   | -0.24              | -0.33 to -0.15  | <0.001         |
| <b>Delayed transfers of care days per hospital bed</b> | 837      | 148                   | -25.1              | -39.1 to -11.0  | 0.001          |
| <b>2 week wait cancer target adherence (%)</b>         | 833      | 148                   | 0.05               | 0.00 to 0.09    | 0.031          |
| <b>62 day cancer treatment target adherence (%)</b>    | 833      | 148                   | 0.12               | 0.03 to 0.21    | 0.009          |

**Table 5. Outcomes and process measures in trusts struggling (i.e. in special measures or subject to enforcement action) versus those that are not.**

|                                                               | <b>Struggling trust</b> | <b>Non-struggling trust</b> | <b>p-value</b> |
|---------------------------------------------------------------|-------------------------|-----------------------------|----------------|
| <b>Readmission rate (%)</b>                                   | 3.6 (3.1 to 3.9)        | 3.7 (3.1 to 3.9)            | 0.285          |
| <b>Inpatient satisfaction score (out of 10)</b>               | 7.9 (7.8 to 8.1)        | 7.9 (7.8 to 8.1)            | 0.378          |
| <b>A&amp;E 4 hour target breach rate (%)</b>                  | 6.8 (5.2 to 10.2)       | 5.5 (4.2 to 8.3)            | <0.001         |
| <b>Delayed transfer of care days per hospital bed</b>         | 8.2 (4.5 to 11.9)       | 6.4 (4.0 to 10.4)           | 0.005          |
| <b>Cancer two week wait target adherence (%)</b>              | 95.1 (94.0 to 96.4)     | 95.5 (94.4 to 96.8)         | 0.002          |
| <b>Cancer 62 days to first treatment target adherence (%)</b> | 86.6 (83.7 to 88.9)     | 87.4 (84.8 to 89.6)         | 0.002          |



1  
2  
3  
4  
5  
6  
7  
8  
9  
10  
11  
12  
13  
14  
15  
16  
17  
18  
19  
20  
21  
22  
23  
24  
25  
26  
27  
28  
29  
30  
31  
32  
33  
34  
35  
36  
37  
38  
39  
40  
41  
42  
43  
44  
45  
46  
47  
48  
49  
50  
51  
52  
53  
54  
55  
56  
57  
58  
59  
60



Figure 1. Distribution of average operating surplus/deficit over the 2011-16 period.



Figure 2. Trends in operating margin and clinical outcomes over time.



Figure 3. Trends in operating margin and process measures over time. Abbreviations: A&E, Accident & Emergency.

1  
2  
3  
4  
5  
6  
7  
8  
9  
10  
11  
12  
13  
14  
15  
16  
17  
18  
19  
20  
21  
22  
23  
24  
25  
26  
27  
28  
29  
30  
31  
32  
33  
34  
35  
36  
37  
38  
39  
40  
41  
42  
43  
44  
45  
46  
47  
48  
49  
50  
51  
52  
53  
54  
55  
56  
57  
58  
59  
60



Figure 4. 2011-12 correlation between delayed transfers of care, elective operation cancellations, agency spend, A&E breaches and operating margin. Elective surgery cancellations are last-minute elective operation cancellations (for non-clinical reasons) standardised in this figure to number of available beds at the Trust (as a proxy for hospital capacity). Agency spend is displayed as a proportion of turnover. Operating margin is as defined in study methods. Abbreviations: A&E, Accident & Emergency; DTOC, delayed transfer of care.



Figure 5. 2015-16 correlation between delayed transfers of care, elective operation cancellations, agency spend, A&E breaches and operating margin. Elective surgery cancellations are last-minute elective operation cancellations (for non-clinical reasons) standardised in this figure to number of available beds at the Trust (as a proxy for hospital capacity). Agency spend is displayed as a proportion of turnover. Operating margin is as defined in study methods. Abbreviations: A&E, Accident & Emergency; DTOC, delayed transfer of care.

# Financial Performance of English NHS Trusts and Clinical Outcomes: A Longitudinal Observational Study

## ONLINE SUPPLEMENTAL DATA

Myura Nagendran, MRCP, FRCA<sup>1</sup>

Grace Kiew, MB BChir<sup>2</sup>

Rosalind Raine, PhD<sup>3</sup>

Rifat Atun, FRCP<sup>4</sup>

Mahiben Maruthappu, BM BCh<sup>5</sup>

1. Academic Clinical Fellow, Division of Anaesthetics, Pain Medicine and Intensive Care, Imperial College London, UK
2. Foundation Doctor, North West Anglia NHS Foundation Trust, Peterborough, UK
3. Professor, Department of Applied Health Care, University College London, UK
4. Professor, Harvard T.H. Chan School of Public Health, Harvard University, Boston, MA, USA
5. Public Health Registrar, Department of Epidemiology and Public Health, University College London, UK

**Supplement version:** 2.3

## FINANCIAL DATA EXTRACTION

Where financial data was extracted from consolidated end of year accounts files via the gov.uk open data portal, the following fields were extracted:

### For foundation trusts:

|                 |                                                 |
|-----------------|-------------------------------------------------|
| Turnover        | --> Table ID 1, Subcode 100                     |
| Surplus/Deficit | --> Table ID 1, Subcode 160                     |
| Consultancy     | --> 07A and 07I, subcode 280                    |
| Agency spend    | --> 1415TRU06_EXP_P13, maincode 01, subcode 180 |

### For non-Foundation trusts:

|                 |                                                                                       |
|-----------------|---------------------------------------------------------------------------------------|
| Turnover        | --> Table ID CNE, Subcode 120 and 130                                                 |
| Surplus/Deficit | --> Table ID CNE, Subcode 390                                                         |
| Consultancy     | --> 08C, subcode 125 ( <b>only available for 2014-16</b> )                            |
| Agency spend    | --> 1415TRU09_EMP_P13, maincode 04, subcode 100 ( <b>only available for 2015-16</b> ) |

## 1 DELAYED TRANSFERS OF CARE IN FINANCIAL YEAR ENDING 2011

2  
3  
4 Delayed transfer of care data were only available at Trust level for the latter eight months of the  
5 2011 financial year. To ensure comparability with other years, a 1.5x multiplier was applied for  
6 each trust in this financial year with a sensitivity analysis to examine any impact of this change.  
7  
8

9  
10  
11 The total numbers of delayed transfers for all hospitals were available as an aggregate total  
12 (data obtained from King's Fund Quarterly Monitoring Report for 2010-11).  
13  
14

15  
16 The ratio of aggregate delayed transfer of care days for the first 4 months (April 2010 to July  
17 2010) to the last 8 months (August 2010 to March 2011) was 0.492; suggesting that a 1.5x  
18 multiplier appeared reasonable.  
19  
20  
21  
22

| Year | Month | Number of DTOCs | 4-monthly total |
|------|-------|-----------------|-----------------|
| 2010 | Apr   | 113900          | -               |
| 2010 | May   | 112442          | -               |
| 2010 | Jun   | 115336          | -               |
| 2010 | Jul   | 109918          | <b>451596</b>   |
| -    | -     | -               | -               |
| 2010 | Aug   | 115855          | -               |
| 2010 | Sep   | 113246          | -               |
| 2010 | Oct   | 113091          | -               |
| 2010 | Nov   | 116466          | <b>458658</b>   |
| -    | -     | -               | -               |
| 2010 | Dec   | 114346          | -               |
| 2011 | Jan   | 112386          | -               |
| 2011 | Feb   | 123130          | -               |
| 2011 | Mar   | 109362          | <b>459224</b>   |



## CHANGES TO TRUST COMPOSITION

The 168 Trusts listed below include specialist Trusts (e.g. Great Ormond Street Hospital for Children NHS Foundation Trust) that were excluded prior to analysis. Changes in composition to the Trusts (creation of a new Trust, dissolution of an existing Trust, acquisitions of a hospital or entire Trust to another Trust and mergers between Trusts) are detailed at the end of the table.

| Trust                                                           | Trust identifier | Change in composition | Transitioned to Foundation status | Foundation Trust transition date |
|-----------------------------------------------------------------|------------------|-----------------------|-----------------------------------|----------------------------------|
| Aintree University Hospital NHS Foundation Trust                | REM              |                       |                                   |                                  |
| Airedale NHS Foundation Trust                                   | RCF              |                       | Yes                               | 01/06/2010                       |
| Alder Hey Children's NHS Foundation Trust                       | RBS              |                       |                                   |                                  |
| Ashford and St Peter's Hospitals NHS Foundation Trust           | RTK              |                       | Yes                               | 01/12/2010                       |
| Barking, Havering and Redbridge University Hospitals NHS Trust  | RF4              |                       |                                   |                                  |
| Barnet and Chase Farm Hospitals NHS Trust                       | RVL              | Yes (1)               |                                   |                                  |
| Barnsley Hospital NHS Foundation Trust                          | RFF              |                       |                                   |                                  |
| Barts and the London NHS Trust                                  | RNJ              | Yes (2)               |                                   |                                  |
| Barts Health NHS Trust                                          | R1H              | Yes (3)               |                                   |                                  |
| Basildon and Thurrock University Hospitals NHS Foundation Trust | RDD              |                       |                                   |                                  |
| Bedford Hospital NHS Trust                                      | RC1              |                       |                                   |                                  |
| Birmingham Children's Hospital NHS Foundation Trust             | RQ3              |                       |                                   |                                  |
| Birmingham Women's NHS Foundation Trust                         | RLU              |                       |                                   |                                  |
| Blackpool Teaching Hospitals NHS Foundation Trust               | RXL              |                       |                                   |                                  |
| Bolton NHS Foundation Trust                                     | RMC              |                       |                                   |                                  |
| Bradford Teaching Hospitals NHS Foundation Trust                | RAE              |                       |                                   |                                  |
| Brighton and Sussex University Hospitals NHS Trust              | RXH              |                       |                                   |                                  |
| Buckinghamshire Healthcare NHS Trust                            | RXQ              |                       |                                   |                                  |

|    |                                                                |     |         |     |            |
|----|----------------------------------------------------------------|-----|---------|-----|------------|
| 1  | Burton Hospitals NHS Foundation Trust                          | RJF |         |     |            |
| 2  | Calderdale and Huddersfield NHS Foundation Trust               | RWY |         |     |            |
| 3  | Cambridge University Hospitals NHS Foundation Trust            | RGT |         |     |            |
| 4  | Central Manchester University Hospitals NHS Foundation Trust   | RW3 | Yes (4) |     |            |
| 5  | Chelsea and Westminster Hospital NHS Foundation Trust          | RQM | Yes (5) |     |            |
| 6  | Chesterfield Royal Hospital NHS Foundation Trust               | RFS |         |     |            |
| 7  | City Hospitals Sunderland NHS Foundation Trust                 | RLN |         |     |            |
| 8  | Colchester Hospital University NHS Foundation Trust            | RDE |         |     |            |
| 9  | Countess Of Chester Hospital NHS Foundation Trust              | RJR |         |     |            |
| 10 | County Durham and Darlington NHS Foundation Trust              | RXP |         |     |            |
| 11 | Croydon Health Services NHS Trust                              | RJ6 |         |     |            |
| 12 | Dartford and Gravesham NHS Trust                               | RN7 |         |     |            |
| 13 | Derby Teaching Hospitals NHS Foundation Trust                  | RTG |         |     |            |
| 14 | Doncaster and Bassetlaw Hospitals NHS Foundation Trust         | RP5 |         |     |            |
| 15 | Dorset County Hospital NHS Foundation Trust                    | RBD |         |     |            |
| 16 | Ealing Hospital NHS Trust                                      | RC3 | Yes (6) |     |            |
| 17 | East and North Hertfordshire NHS Trust                         | RWH |         |     |            |
| 18 | East Cheshire NHS Trust                                        | RJN |         |     |            |
| 19 | East Kent Hospitals University NHS Foundation Trust            | RVV |         |     |            |
| 20 | East Lancashire Hospitals NHS Trust                            | RXR |         |     |            |
| 21 | East Sussex Healthcare NHS Trust                               | RXC |         |     |            |
| 22 | Epsom and St Helier University Hospitals NHS Trust             | RVR |         |     |            |
| 23 | Frimley Health NHS Foundation Trust                            | RDU | Yes (7) |     |            |
| 24 | Gateshead Health NHS Foundation Trust                          | RR7 |         |     |            |
| 25 | George Eliot Hospital NHS Trust                                | RLT |         |     |            |
| 26 | Gloucestershire Hospitals NHS Foundation Trust                 | RTE |         |     |            |
| 27 | Great Ormond Street Hospital for Children NHS Foundation Trust | RP4 |         | Yes | 01/03/2012 |
| 28 | Great Western Hospitals NHS Foundation Trust                   | RN3 |         |     |            |
| 29 | Guy's and St Thomas' NHS Foundation Trust                      | RJ1 |         |     |            |
| 30 | Hampshire Hospitals NHS Foundation Trust                       | RN5 | Yes (8) |     |            |

|    |                                                               |     |          |     |            |
|----|---------------------------------------------------------------|-----|----------|-----|------------|
| 1  | Harrogate and District NHS Foundation Trust                   | RCD |          |     |            |
| 2  | Heart Of England NHS Foundation Trust                         | RR1 |          |     |            |
| 3  | Heatherwood and Wexham Park Hospitals NHS Foundation Trust    | RD7 | Yes (9)  |     |            |
| 4  | Hinchingbrooke Health Care NHS Trust                          | RQQ |          |     |            |
| 5  | Homerton University Hospital NHS Foundation Trust             | RQX |          |     |            |
| 6  | Hull and East Yorkshire Hospitals NHS Trust                   | RWA |          |     |            |
| 7  | Imperial College Healthcare NHS Trust                         | RYJ |          |     |            |
| 8  | Ipswich Hospital NHS Trust                                    | RGQ |          |     |            |
| 9  | Isle Of Wight NHS Trust                                       | R1F | Yes (10) |     |            |
| 10 | James Paget University Hospitals NHS Foundation Trust         | RGP |          |     |            |
| 11 | Kettering General Hospital NHS Foundation Trust               | RNQ |          |     |            |
| 12 | King's College Hospital NHS Foundation Trust                  | RJZ | Yes (11) |     |            |
| 13 | Kingston Hospital NHS Foundation Trust                        | RAX |          | Yes | 01/05/2013 |
| 14 | Lancashire Teaching Hospitals NHS Foundation Trust            | RXN |          |     |            |
| 15 | Leeds Teaching Hospitals NHS Trust                            | RR8 |          |     |            |
| 16 | Lewisham and Greenwich NHS Trust                              | RJ2 | Yes (12) |     |            |
| 17 | Liverpool Heart and Chest NHS Foundation Trust                | RBQ |          |     |            |
| 18 | Liverpool Women's NHS Foundation Trust                        | REP |          |     |            |
| 19 | London North West Healthcare NHS Trust                        | R1K | Yes (13) |     |            |
| 20 | Luton and Dunstable University Hospital NHS Foundation Trust  | RC9 |          |     |            |
| 21 | Maidstone and Tunbridge Wells NHS Trust                       | RWF |          |     |            |
| 22 | Medway NHS Foundation Trust                                   | RPA |          |     |            |
| 23 | Mid Cheshire Hospitals NHS Foundation Trust                   | RBT |          |     |            |
| 24 | Mid Essex Hospital Services NHS Trust                         | RQ8 |          |     |            |
| 25 | Mid Staffordshire NHS Foundation Trust                        | RJD | Yes (14) |     |            |
| 26 | Mid Yorkshire Hospitals NHS Trust                             | RXF |          |     |            |
| 27 | Milton Keynes University Hospital NHS Foundation Trust        | RD8 |          |     |            |
| 28 | Moorfields Eye Hospital NHS Foundation Trust                  | RP6 |          |     |            |
| 29 | Newham University Hospital NHS Trust                          | RNH | Yes (15) |     |            |
| 30 | Norfolk and Norwich University Hospitals NHS Foundation Trust | RM1 |          |     |            |

|    |                                                                                    |     |          |     |            |
|----|------------------------------------------------------------------------------------|-----|----------|-----|------------|
| 1  | North Bristol NHS Trust                                                            | RVJ |          |     |            |
| 2  | North Cumbria University Hospitals NHS Trust                                       | RNL |          |     |            |
| 3  | North Middlesex University Hospital NHS Trust                                      | RAP |          |     |            |
| 4  | North Tees and Hartlepool NHS Foundation Trust                                     | RVW |          |     |            |
| 5  | North West London Hospitals NHS Trust                                              | RV8 | Yes (16) |     |            |
| 6  | Northampton General Hospital NHS Trust                                             | RNS |          |     |            |
| 7  | Northern Devon Healthcare NHS Trust                                                | RBZ |          |     |            |
| 8  | Northern Lincolnshire and Goole NHS Foundation Trust                               | RJL |          |     |            |
| 9  | Northumbria Healthcare NHS Foundation Trust                                        | RTF |          |     |            |
| 10 | Nottingham University Hospitals NHS Trust                                          | RX1 |          |     |            |
| 11 | Oxford University Hospitals NHS Foundation Trust                                   | RTH | Yes (17) | Yes | 01/10/2015 |
| 12 | Papworth Hospital NHS Foundation Trust                                             | RGM |          |     |            |
| 13 | Pennine Acute Hospitals NHS Trust                                                  | RW6 |          |     |            |
| 14 | Peterborough and Stamford Hospitals NHS Foundation Trust                           | RGN |          |     |            |
| 15 | Plymouth Hospitals NHS Trust                                                       | RK9 |          |     |            |
| 16 | Poole Hospital NHS Foundation Trust                                                | RD3 |          |     |            |
| 17 | Portsmouth Hospitals NHS Trust                                                     | RHU |          |     |            |
| 18 | Queen Victoria Hospital NHS Foundation Trust                                       | RPC |          |     |            |
| 19 | Robert Jones and Agnes Hunt Orthopaedic and District Hospital NHS Foundation Trust | RL1 |          | Yes | 01/08/2011 |
| 20 | Royal Berkshire NHS Foundation Trust                                               | RHW |          |     |            |
| 21 | Royal Brompton and Harefield NHS Foundation Trust                                  | RT3 |          |     |            |
| 22 | Royal Cornwall Hospitals NHS Trust                                                 | REF |          |     |            |
| 23 | Royal Devon and Exeter NHS Foundation Trust                                        | RH8 |          |     |            |
| 24 | Royal Free London NHS Foundation Trust                                             | RAL | Yes (18) | Yes | 01/04/2012 |
| 25 | Royal Liverpool and Broadgreen University Hospitals NHS Trust                      | RQ6 |          |     |            |
| 26 | Royal National Hospital For Rheumatic Diseases NHS Foundation Trust                | RBB | Yes (19) |     |            |
| 27 | Royal National Orthopaedic Hospital NHS Trust                                      | RAN |          |     |            |
| 28 | Royal Surrey County NHS Foundation Trust                                           | RA2 |          |     |            |
| 29 | Royal United Hospitals Bath NHS Foundation Trust                                   | RD1 | Yes (20) | Yes | 01/11/2014 |
| 30 | Salford Royal NHS Foundation Trust                                                 | RM3 |          |     |            |

|    |                                                                       |     |          |     |            |
|----|-----------------------------------------------------------------------|-----|----------|-----|------------|
| 1  | Salisbury NHS Foundation Trust                                        | RNZ |          |     |            |
| 2  | Sandwell and West Birmingham Hospitals NHS Trust                      | RXK |          |     |            |
| 3  | Scarborough and North East Yorkshire Healthcare NHS Trust             | RCC | Yes (21) |     |            |
| 4  | Sheffield Children's NHS Foundation Trust                             | RCU |          |     |            |
| 5  | Sheffield Teaching Hospitals NHS Foundation Trust                     | RHQ |          |     |            |
| 6  | Sherwood Forest Hospitals NHS Foundation Trust                        | RK5 |          |     |            |
| 7  | Shrewsbury and Telford Hospital NHS Trust                             | RXW |          |     |            |
| 8  | South London NHS Healthcare Trust                                     | RYQ | Yes (22) |     |            |
| 9  | South Tees Hospitals NHS Foundation Trust                             | RTR |          |     |            |
| 10 | South Tyneside NHS Foundation Trust                                   | RE9 |          |     |            |
| 11 | South Warwickshire NHS Foundation Trust                               | RJC |          |     |            |
| 12 | Southend University Hospital NHS Foundation Trust                     | RAJ |          |     |            |
| 13 | Southport and Ormskirk Hospital NHS Trust                             | RVY |          |     |            |
| 14 | St George's University Hospitals NHS Foundation Trust                 | RJ7 |          | Yes | 01/02/2015 |
| 15 | St Helens and Knowsley Hospitals NHS Trust                            | RBN |          |     |            |
| 16 | Stockport NHS Foundation Trust                                        | RWJ |          |     |            |
| 17 | Surrey and Sussex Healthcare NHS Trust                                | RTP |          |     |            |
| 18 | Tameside Hospital NHS Foundation Trust                                | RMP |          |     |            |
| 19 | Taunton and Somerset NHS Foundation Trust                             | RBA |          |     |            |
| 20 | The Christie NHS Foundation Trust                                     | RBV |          |     |            |
| 21 | The Clatterbridge Cancer Centre NHS Foundation Trust                  | REN |          |     |            |
| 22 | The Dudley Group NHS Foundation Trust                                 | RNA |          |     |            |
| 23 | The Hillingdon Hospitals NHS Foundation Trust                         | RAS |          | Yes | 01/04/2011 |
| 24 | The Newcastle Upon Tyne Hospitals NHS Foundation Trust                | RTD |          |     |            |
| 25 | The Princess Alexandra Hospital NHS Trust                             | RQW |          |     |            |
| 26 | The Queen Elizabeth Hospital, King's Lynn. NHS Foundation Trust       | RCX |          | Yes | 01/02/2011 |
| 27 | The Rotherham NHS Foundation Trust                                    | RFR |          |     |            |
| 28 | The Royal Bournemouth and Christchurch Hospitals NHS Foundation Trust | RDZ |          |     |            |
| 29 | The Royal Marsden NHS Foundation Trust                                | RPY |          |     |            |
| 30 | The Royal Orthopaedic Hospital NHS Foundation Trust                   | RRJ |          |     |            |

|    |                                                              |     |          |     |            |
|----|--------------------------------------------------------------|-----|----------|-----|------------|
| 1  | The Royal Wolverhampton NHS Trust                            | RL4 | Yes (23) |     |            |
| 2  | The Walton Centre NHS Foundation Trust                       | RET |          |     |            |
| 3  | The Whittington Hospital NHS Trust                           | RKE |          |     |            |
| 4  | Torbay and South Devon NHS Foundation Trust                  | RA9 | Yes (24) |     |            |
| 5  | Trafford Healthcare NHS Trust                                | RM4 | Yes (25) |     |            |
| 6  | United Lincolnshire Hospitals NHS Trust                      | RWD |          |     |            |
| 7  | University College London Hospitals NHS Foundation Trust     | RRV |          |     |            |
| 8  | University Hospital Of South Manchester NHS Foundation Trust | RM2 |          |     |            |
| 9  | University Hospital Southampton NHS Foundation Trust         | RHM |          | Yes | 01/10/2011 |
| 10 | University Hospitals Birmingham NHS Foundation Trust         | RRK |          |     |            |
| 11 | University Hospitals Bristol NHS Foundation Trust            | RA7 |          |     |            |
| 12 | University Hospitals Coventry and Warwickshire NHS Trust     | RKB |          |     |            |
| 13 | University Hospitals Of Leicester NHS Trust                  | RWE |          |     |            |
| 14 | University Hospitals Of Morecambe Bay NHS Foundation Trust   | RTX |          | Yes | 01/10/2010 |
| 15 | University Hospitals of North Midlands NHS Trust             | RJE | Yes (26) |     |            |
| 16 | Walsall Healthcare NHS Trust                                 | RBK |          |     |            |
| 17 | Warrington and Halton Hospitals NHS Foundation Trust         | RWW |          |     |            |
| 18 | West Hertfordshire Hospitals NHS Trust                       | RWG |          |     |            |
| 19 | West Middlesex University Hospital NHS Trust                 | RFW | Yes (27) |     |            |
| 20 | West Suffolk NHS Foundation Trust                            | RGR |          | Yes | 01/12/2011 |
| 21 | Western Sussex Hospitals NHS Foundation Trust                | RYR |          | Yes | 01/07/2013 |
| 22 | Weston Area Health NHS Trust                                 | RA3 |          |     |            |
| 23 | Whipps Cross University Hospital NHS Trust                   | RGC | Yes (28) |     |            |
| 24 | Winchester and Eastleigh Healthcare Trust                    | RN1 | Yes (29) |     |            |
| 25 | Wirral University Teaching Hospital NHS Foundation Trust     | RBL |          |     |            |
| 26 | Worcestershire Acute Hospitals NHS Trust                     | RWP |          |     |            |
| 27 | Wrightington, Wigan and Leigh NHS Foundation Trust           | RRF |          |     |            |
| 28 | Wye Valley NHS Trust                                         | RLQ | Yes (30) |     |            |
| 29 | Yeovil District Hospital NHS Foundation Trust                | RA4 |          |     |            |
| 30 | York Teaching Hospital NHS Foundation Trust                  | RCB | Yes (31) |     |            |

- 1
- 2 1. Acquired by Royal Free London NHS FT in 2014
- 3
- 4 2. Merged with Newham University Hospital NHS Trust and Whipps Cross University Hospital NHS Trust to form Barts Health NHS Trust in 2012
- 5
- 6 3. Formed from the merger of Barts and the London NHS Trust, Whipps Cross University Hospital NHS Trust and Newham University Hospital NHS
- 7 Trust in 2012
- 8
- 9 4. Acquired Trafford Healthcare NHS Trust in Apr 2012
- 10
- 11 5. Acquired West Middlesex University Hospital NHS Trust in Sep 2015
- 12
- 13 6. Merged with North West London Hospitals NHS Trust to form London North West Healthcare NHS Trust in 2014
- 14
- 15 7. Formed by merger of Heatherwood and Wexham Park Hospitals NHS FT and Frimley Park Hospital NHS FT on 1 October 2014
- 16
- 17 8. Formed by acquisition of Winchester and Eastleigh Healthcare Trust by Basingstoke and North Hampshire NHS FT in Jan 2012
- 18
- 19 9. Merged with Frimley Park Hospital NHS FT to form Frimley Health NHS FT on 1 October 2014
- 20
- 21 10. Created in Apr 2012 by a provider split from Isle of Wight NHS PCT (5QT)
- 22
- 23 11. Acquired Princess Royal University Hospital from South London NHS Healthcare Trust's dissolution in Oct 2013
- 24
- 25 12. Formed on 1 Oct 2013 by merger of merger of Lewisham Healthcare NHS Trust and Queen Elizabeth Hospital (previously part of South London
- 26 NHS Healthcare Trust)
- 27
- 28 13. Formed by merger of Ealing Hospital NHS Trust and North West London Hospitals NHS Trust in 2014
- 29
- 30 14. Mid Staffordshire NHS FT which ran Stafford hospital dissolved In Nov 2014. Stafford hospital renamed to County Hospital and acquired by newly
- 31 named University Hospitals of North Midlands NHS Trust
- 32
- 33 15. Merged with Barts and the London NHS Trust and Whipps Cross University Hospital NHS Trust to form Barts Health NHS Trust in 2012
- 34
- 35 16. Merged with Ealing Hospital NHS Trust to form London North West Healthcare NHS Trust in 2014
- 36
- 37 17. Formed from Oxford Radcliffe Hospitals NHS Trust by acquisition of Nuffield Orthopaedic Acute Centre NHS Trust in 2011
- 38
- 39 18. Acquired Barnet and Chase Farm Hospitals NHS Trust in 2014
- 40
- 41 19. Acquired by Royal United Hospital Bath NHS FT on 1 Feb 2015
- 42
- 43 20. Acquired Royal National Hospital For Rheumatic Diseases NHS FT on 1 Feb 2015
- 44
- 45 21. Acquired by York Teaching Hospital NHS Foundation Trust in Jul 2013
- 46 22. Dissolved in Oct 2013

- 1 23. Acquired Cannock Chase Hospital when Mid Staffordshire NHS FT dissolved In Nov 2014
- 2 24. Created on 1 Oct 2015 from South Devon Healthcare NHS Foundation Trust merging with Torbay and Southern Devon Health and Care NHS Trust
- 3 (community and social care services)
- 4
- 5 25. Acquired by Central Manchester University Hospitals NHS FT in Apr 2012
- 6
- 7 26. Formed from University Hospital Of North Staffordshire NHS Trust taking over Stafford Hospital (now named County Hospital) on 1 Nov 2014. Mid
- 8 Staffordshire NHS FT which ran Stafford hospital dissolved In Nov 2014
- 9
- 10 27. Acquired by Chelsea and Westminster Hospital NHS FT in Sep 2015
- 11
- 12 28. Merged with Newham University Hospital NHS Trust and Barts and the London NHS Trust to form Barts Health NHS Trust in 2012
- 13
- 14 29. Acquired by Basingstoke and North Hampshire NHS FT to form Hampshire Hospitals NHS FT in Jan 2012
- 15
- 16 30. Formed from Hereford Hospitals NHS Trust on 1 April 2011 following Herefordshire's health and adult social care providers joining to form an
- 17 integrated provider of acute, community and social care in England
- 18
- 19 31. Acquired Scarborough and North East Yorkshire Healthcare NHS Trust in Jul 2013
- 20
- 21
- 22
- 23
- 24
- 25
- 26
- 27
- 28
- 29
- 30
- 31
- 32
- 33
- 34
- 35
- 36
- 37
- 38
- 39
- 40
- 41
- 42
- 43
- 44
- 45
- 46



1  
2  
3  
4  
5  
6  
7  
8  
9  
10  
11  
12  
13  
14  
15  
16  
17  
18  
19  
20  
21  
22  
23  
24  
25  
26  
27  
28  
29  
30  
31  
32  
33  
34  
35  
36  
37  
38  
39  
40  
41  
42  
43  
44  
45  
46

**SENSITIVITY ANALYSES, ADDITIONAL TABLES AND FIGURES**

**Table A. Association of operating margin with outcomes and process measures (summary model for 2011-13).** Operating margin and outcomes were averaged over the 3 years from 2011-13 to form the inputs to the summary model. Readmission rate is not included as data was not available for 2011-13. Abbreviations: A&E, Accident & Emergency; CI, confidence interval.

| <b>Agency spend as a proportion of turnover (%)</b> |             |             |             |             |             |             |
|-----------------------------------------------------|-------------|-------------|-------------|-------------|-------------|-------------|
|                                                     | <b>2011</b> | <b>2012</b> | <b>2013</b> | <b>2014</b> | <b>2015</b> | <b>2016</b> |
| <b>Worst 10%</b>                                    | 3.9         | 3.9         | 4.6         | 6.0         | 8.5         | 9.1         |
| <b>Middle 80%</b>                                   | 2.4         | 2.3         | 2.6         | 3.0         | 4.6         | 5.1         |
| <b>Best 10%</b>                                     | 2.7         | 2.9         | 3.4         | 3.8         | 4.0         | 4.5         |
|                                                     |             |             |             |             |             |             |
| <b>Ratio of worst to best</b>                       | 1.4         | 1.3         | 1.4         | 1.6         | 2.1         | 2.0         |
| <b>Difference (best and worst)</b>                  | 1.2         | 1.0         | 1.2         | 2.2         | 4.5         | 4.6         |

**Table B. Outcomes and process measures in Foundation trusts versus non-foundation trusts.** Excludes trusts that changed in composition or transitioned to Foundation status during the study period. Values are median (IQR). P-value refers to a Kruskal-Wallis equality-of-populations rank test.

|                                                               | Foundation trust    | Non-foundation trust | p-value |
|---------------------------------------------------------------|---------------------|----------------------|---------|
| <b>Readmission rate (%)</b>                                   | 3.5 (3.0 to 3.9)    | 3.7 (3.3 to 4.0)     | <0.001  |
| <b>Inpatient satisfaction score (out of 10)</b>               | 8.0 (7.8 to 8.2)    | 7.8 (7.7 to 8.0)     | <0.001  |
| <b>A&amp;E 4 hour target breach rate (%)</b>                  | 5.4 (4.2 to 7.8)    | 6.9 (4.9 to 10.5)    | <0.001  |
| <b>Delayed transfer of care days per hospital bed</b>         | 6.8 (3.5 to 11.0)   | 7.0 (4.5 to 11.2)    | 0.241   |
| <b>Cancer two week wait target adherence (%)</b>              | 95.5 (94.6 to 96.7) | 94.9 (94.0 to 96.3)  | <0.001  |
| <b>Cancer 62 days to first treatment target adherence (%)</b> | 87.7 (85.4 to 89.7) | 86.2 (82.5 to 88.2)  | <0.001  |

**Tables C1 & C2. Association of operating margin on outcomes and process measures. Association of operating margin with outcomes and process measures.** These estimates are derived from a linear regression with outcome/process measure as the dependent variable and the following independent variables: operating margin, number of beds available and year. Each Trust in each year was treated as a separate observation with standard errors clustered by Trust to account for the non-independence of Trust-level data. Abbreviations: A&E, Accident & Emergency; CI, confidence interval. E1 includes Foundation trusts only. E2 includes non-Foundation trusts only. Trusts that transitioned to Foundation status are excluded in both tables.

**Table C1. Association of operating margin on outcomes and process measures in Foundation trusts.**

| Outcome                                         | n   | Trust clusters | Coefficient | 95% CI          | p-value |
|-------------------------------------------------|-----|----------------|-------------|-----------------|---------|
| Readmission rate (%)                            | 206 | 71             | -0.015      | -0.039 to 0.008 | 0.202   |
| Inpatient satisfaction score (out of 10)        | 429 | 73             | 0.52        | -0.46 to 1.49   | 0.293   |
| A&E 4 hour breach rate (%)                      | 430 | 73             | -0.25       | -0.37 to -0.13  | <0.001  |
| Delayed transfers of care days per hospital bed | 431 | 73             | -21.8       | -40.7 to -2.9   | 0.024   |
| 2 week wait cancer target adherence (%)         | 431 | 73             | 0.05        | -0.01 to 0.10   | 0.083   |
| 62 day cancer treatment target adherence (%)    | 431 | 73             | 0.08        | -0.02 to 0.17   | 0.110   |

**Table C2. Association of operating margin on outcomes and process measures in non-foundation trusts.**

| Outcome                                         | n   | Trust clusters | Coefficient | 95% CI          | p-value |
|-------------------------------------------------|-----|----------------|-------------|-----------------|---------|
| Readmission rate (%)                            | 142 | 51             | 0.004       | -0.023 to 0.032 | 0.751   |
| Inpatient satisfaction score (out of 10)        | 318 | 62             | 1.59        | 0.43 to 2.76    | 0.008   |
| A&E 4 hour breach rate (%)                      | 327 | 62             | -0.23       | -0.39 to -0.07  | 0.005   |
| Delayed transfers of care days per hospital bed | 328 | 62             | -39.2       | -63.3 to -15.1  | 0.002   |
| 2 week wait cancer target adherence (%)         | 324 | 62             | 0.26        | -0.06 to 0.11   | 0.527   |
| 62 day cancer treatment target adherence (%)    | 324 | 62             | 0.22        | 0.05 to 0.38    | 0.010   |

**Table D. Assessment of the impact of not adjusting for missing 2011 delayed transfer of care data.** Abbreviations: CI, confidence interval.

| Delayed transfers of care days per hospital bed | n   | Trust clusters | Coefficient | 95% CI         | p-value |
|-------------------------------------------------|-----|----------------|-------------|----------------|---------|
| Without adjustment for missing 2011 data        | 837 | 148            | -21.9       | -35.5 to -8.4  | 0.002   |
| With adjustment for missing 2011 data           | 837 | 148            | -25.1       | -39.1 to -11.0 | 0.001   |

**Table E. Association of operating margin with outcomes and process measures.** Adjusted regression analyses as per table 3 in the manuscript excluding Trusts that had changed in composition between 2011 and 2016. Abbreviations: A&E, Accident & Emergency; SHMI, Summary Hospital-level Mortality Indicator.

| Outcome                                         | n   | Trust clusters | Coefficient | 95% CI         | p-value |
|-------------------------------------------------|-----|----------------|-------------|----------------|---------|
| Readmission rate (%)                            | 344 | 119            | -0.01       | -0.03 to 0.01  | 0.403   |
| Inpatient satisfaction score (out of 10)        | 706 | 119            | 0.66        | -0.23 to 1.55  | 0.142   |
| A&E 4 hour breach rate (%)                      | 710 | 119            | -0.20       | -0.30 to -0.11 | <0.001  |
| Delayed transfers of care days per hospital bed | 711 | 119            | -29.5       | -44.1 to -14.8 | <0.001  |
| 2 week wait cancer target adherence (%)         | 710 | 119            | 0.05        | 0.00 to 0.10   | 0.042   |
| 62 day cancer treatment target adherence (%)    | 710 | 119            | 0.12        | 0.02 to 0.23   | 0.018   |

Figure A. Putative interplay of factors affecting Trust finance and performance.

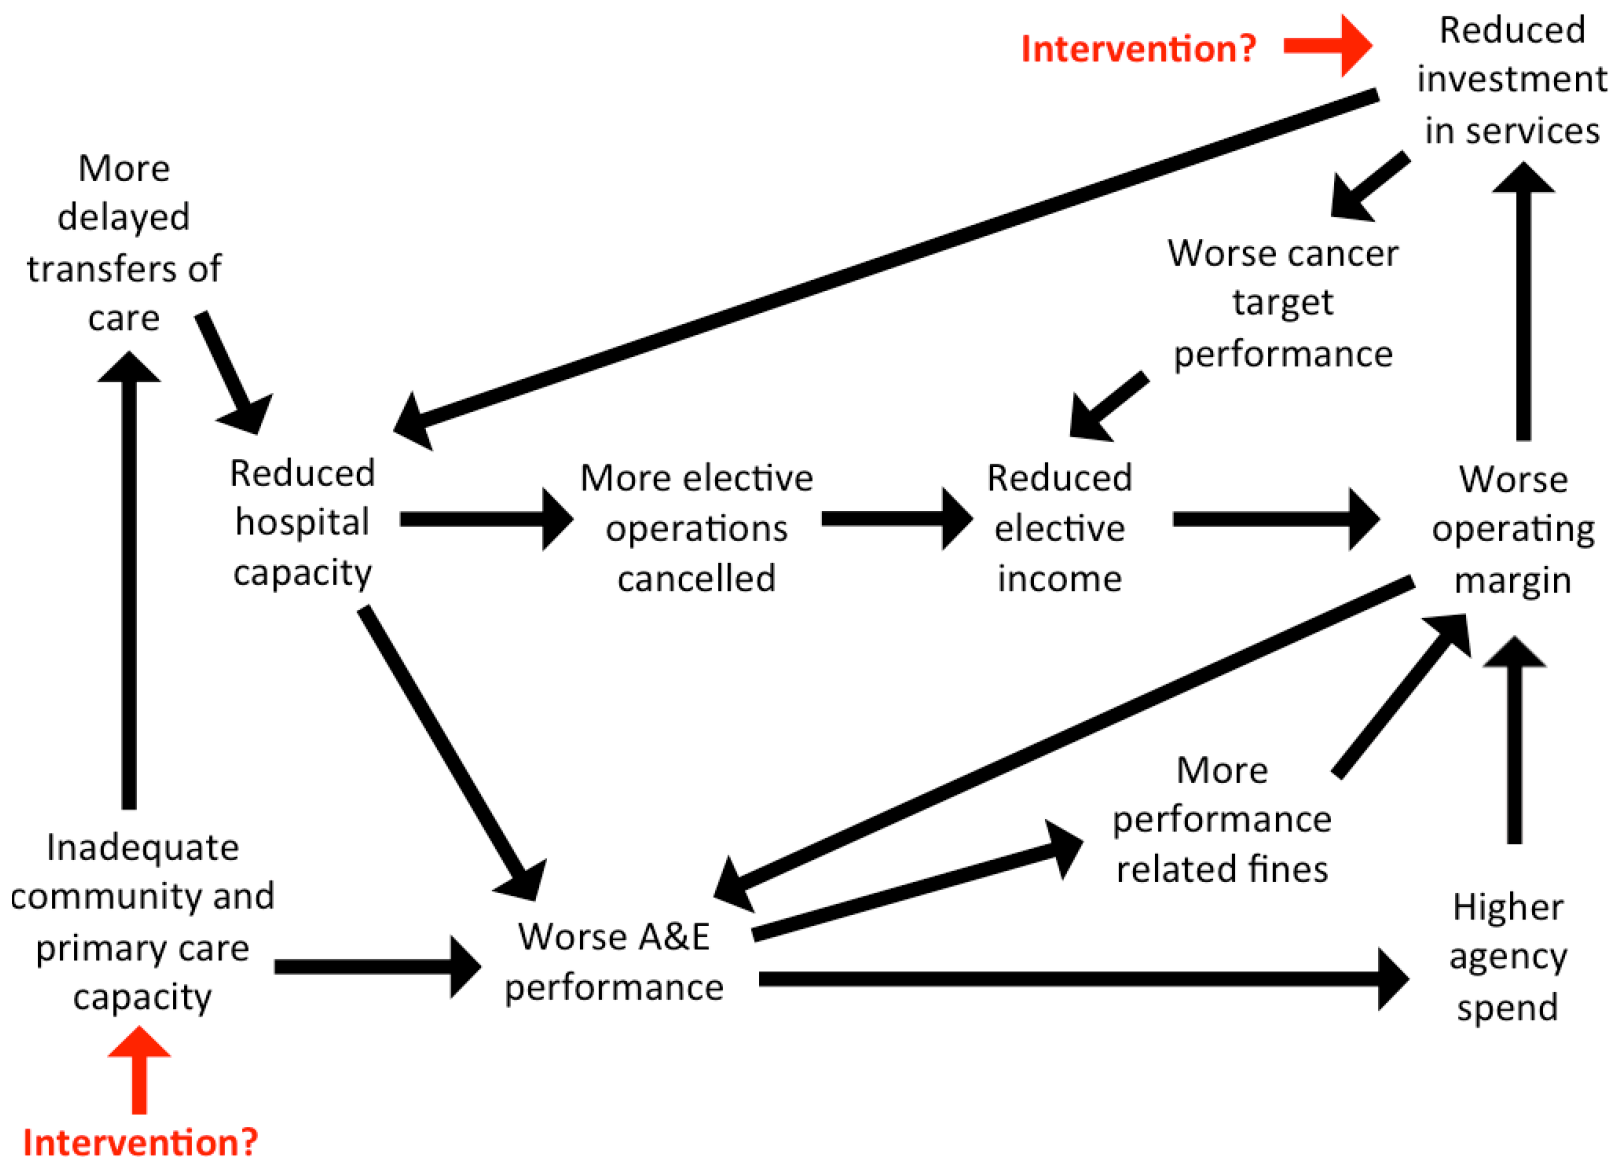

STROBE Statement—Checklist of items that should be included in reports of *cohort studies*

|                              | Item No | Recommendation                                                                                                                                                                                           |
|------------------------------|---------|----------------------------------------------------------------------------------------------------------------------------------------------------------------------------------------------------------|
| <b>Title and abstract</b>    | 1       | (a) Indicate the study's design with a commonly used term in the title or the abstract<br><b>PAGE 1</b>                                                                                                  |
|                              |         | (b) Provide in the abstract an informative and balanced summary of what was done and what was found<br><b>PAGE 2</b>                                                                                     |
| <b>Introduction</b>          |         |                                                                                                                                                                                                          |
| Background/rationale         | 2       | Explain the scientific background and rationale for the investigation being reported<br><b>PAGE 4</b>                                                                                                    |
| Objectives                   | 3       | State specific objectives, including any pre-specified hypotheses<br><b>PAGE 4</b>                                                                                                                       |
| <b>Methods</b>               |         |                                                                                                                                                                                                          |
| Study design                 | 4       | Present key elements of study design early in the paper<br><b>PAGES 5-7</b>                                                                                                                              |
| Setting                      | 5       | Describe the setting, locations, and relevant dates, including periods of recruitment, exposure, follow-up, and data collection<br><b>PAGES 5-7 (IN SO FAR AS APPLICABLE TO THIS STUDY)</b>              |
| Participants                 | 6       | (a) Give the eligibility criteria, and the sources and methods of selection of participants. Describe methods of follow-up<br><b>PAGE 5 (NO PARTICIPANTS, DESCRIBED FOR CENTRES)</b>                     |
|                              |         | (b) For matched studies, give matching criteria and number of exposed and unexposed<br><b>NOT APPLICABLE</b>                                                                                             |
| Variables                    | 7       | Clearly define all outcomes, exposures, predictors, potential confounders, and effect modifiers. Give diagnostic criteria, if applicable<br><b>PAGES 5-7</b>                                             |
| Data sources/<br>measurement | 8*      | For each variable of interest, give sources of data and details of methods of assessment (measurement). Describe comparability of assessment methods if there is more than one group<br><b>PAGES 5-7</b> |
| Bias                         | 9       | Describe any efforts to address potential sources of bias                                                                                                                                                |
| Study size                   | 10      | Explain how the study size was arrived at<br><b>PAGE 5</b>                                                                                                                                               |
| Quantitative variables       | 11      | Explain how quantitative variables were handled in the analyses. If applicable, describe which groupings were chosen and why                                                                             |
| Statistical methods          | 12      | (a) Describe all statistical methods, including those used to control for confounding<br><b>PAGES 7-8</b>                                                                                                |
|                              |         | (b) Describe any methods used to examine subgroups and interactions<br><b>PAGE 7</b>                                                                                                                     |
|                              |         | (c) Explain how missing data were addressed<br><b>PAGES 6-7</b>                                                                                                                                          |
|                              |         | (d) If applicable, explain how loss to follow-up was addressed<br><b>NOT APPLICABLE</b>                                                                                                                  |
|                              |         | (e) Describe any sensitivity analyses<br><b>PAGE 8</b>                                                                                                                                                   |

1  
2  
3  
4  
5  
6  
7  
8  
9  
10  
11  
12  
13  
14  
15  
16  
17  
18  
19  
20  
21  
22  
23  
24  
25  
26  
27  
28  
29  
30  
31  
32  
33  
34  
35  
36  
37  
38  
39  
40  
41  
42  
43  
44  
45  
46  
47  
48  
49  
50  
51  
52  
53  
54  
55  
56  
57  
58  
59  
60

| <b>Results</b>           |     |                                                                                                                                                                                                                                                                                                                                                                                                                                                                                                                                                   |
|--------------------------|-----|---------------------------------------------------------------------------------------------------------------------------------------------------------------------------------------------------------------------------------------------------------------------------------------------------------------------------------------------------------------------------------------------------------------------------------------------------------------------------------------------------------------------------------------------------|
| Participants             | 13* | <p>(a) Report numbers of individuals at each stage of study—eg numbers potentially eligible, examined for eligibility, confirmed eligible, included in the study, completing follow-up, and analysed</p> <p><b>NOT APPLICABLE</b></p> <p>(b) Give reasons for non-participation at each stage</p> <p><b>NOT APPLICABLE BUT DETAILS GIVEN IN ONLINE APPENDIX REGARDING CHANGE IN COMPOSITION OF TRUSTS</b></p> <p>(c) Consider use of a flow diagram</p> <p><b>NOT APPLICABLE</b></p>                                                              |
| Descriptive data         | 14* | <p>(a) Give characteristics of study participants (eg demographic, clinical, social) and information on exposures and potential confounders</p> <p><b>NOT APPLICABLE BUT DETAILS FOR TRUSTS GIVEN ON PAGES 9 &amp; 24</b></p> <p>(b) Indicate number of participants with missing data for each variable of interest</p> <p><b>NOT APPLICABLE BUT DETAILS FOR TRUSTS GIVEN ON PAGE 5 IN METHODS SECTION</b></p> <p>(c) Summarise follow-up time (eg, average and total amount)</p> <p><b>NOT APPLICABLE AS FOLLOW-UP TIME IS STUDY-PERIOD</b></p> |
| Outcome data             | 15* | <p>Report numbers of outcome events or summary measures over time</p> <p><b>NOT APPLICABLE IN THE FORMAT OF NUMBER OF OUTCOME EVENTS</b></p>                                                                                                                                                                                                                                                                                                                                                                                                      |
| Main results             | 16  | <p>(a) Give unadjusted estimates and, if applicable, confounder-adjusted estimates and their precision (eg, 95% confidence interval). Make clear which confounders were adjusted for and why they were included</p> <p><b>PAGES 9-11</b></p> <p>(b) Report category boundaries when continuous variables were categorized</p> <p><b>PAGES 9-11</b></p> <p>(c) If relevant, consider translating estimates of relative risk into absolute risk for a meaningful time period</p> <p><b>NOT APPLICABLE</b></p>                                       |
| Other analyses           | 17  | <p>Report other analyses done—eg analyses of subgroups and interactions, and sensitivity analyses</p> <p><b>PAGE 11 AND ONLINE APPENDIX</b></p>                                                                                                                                                                                                                                                                                                                                                                                                   |
| <b>Discussion</b>        |     |                                                                                                                                                                                                                                                                                                                                                                                                                                                                                                                                                   |
| Key results              | 18  | <p>Summarise key results with reference to study objectives</p> <p><b>PAGE 11</b></p>                                                                                                                                                                                                                                                                                                                                                                                                                                                             |
| Limitations              | 19  | <p>Discuss limitations of the study, taking into account sources of potential bias or imprecision. Discuss both direction and magnitude of any potential bias</p> <p><b>PAGES 13-14</b></p>                                                                                                                                                                                                                                                                                                                                                       |
| Interpretation           | 20  | <p>Give a cautious overall interpretation of results considering objectives, limitations, multiplicity of analyses, results from similar studies, and other relevant evidence</p> <p><b>PAGES 14-16</b></p>                                                                                                                                                                                                                                                                                                                                       |
| Generalisability         | 21  | <p>Discuss the generalisability (external validity) of the study results</p> <p><b>PAGES 14-16</b></p>                                                                                                                                                                                                                                                                                                                                                                                                                                            |
| <b>Other information</b> |     |                                                                                                                                                                                                                                                                                                                                                                                                                                                                                                                                                   |
| Funding                  | 22  | <p>Give the source of funding and the role of the funders for the present study and, if applicable, for the original study on which the present article is based</p>                                                                                                                                                                                                                                                                                                                                                                              |

\*Give information separately for exposed and unexposed groups.

**Note:** An Explanation and Elaboration article discusses each checklist item and gives methodological background and published examples of transparent reporting. The STROBE checklist is best used in conjunction with this article (freely available on the Web sites of PLoS Medicine at <http://www.plosmedicine.org/>, Annals of Internal Medicine at <http://www.annals.org/>, and Epidemiology at <http://www.epidem.com/>). Information on the STROBE Initiative is available at <http://www.strobe-statement.org>.

For peer review only
